# Supplementary material for: Surprising phenotypic diversity of cancer-associated mutations of Gly 34 in the histone H3 tail
Source: eLife. 2021 Feb 1;10:e65369. doi: 10.7554/eLife.65369 (PMC7872514; doi:10.7554/eLife.65369)
Supplement: Supplementary file 1. [file elife-65369-supp1.xlsx]

## Sheet: Strains Used in each Panel
Figure 1a
Figure 1b
Figure 1c	PY 7062
	PY 7108
	PY 7662
	PY 8834
	PY 8835
	PY 9023
	PY 9947
	PY 9949
Figure 1d	PY 7062
	PY 7108
	PY 8834
	PY 9023
Figure 1e	PY 42
	PY 6926
	PY 8197
	PY 8848
	PY 10080
	PY 10148
Figure S1a	PY 7062
	PY 9135
	PY 9136
	PY 9138
	PY 9139
	PY 9186
	PY 9187
Figure S1b	PY 42
	PY 4507
Figue S1c	PY 7062
	PY 10080
Figure 2a	PY 7062
	PY 8834
	PY 9947
	PY 9023
	PY 7108
Figure 2b	PY 7062
	PY 9023
	PY 7108
	PY 8834
Figure 2c	7062
	8834
	9947
	9023
	7108
Figure 2d	7062
	7059
	8834
	9947
	9325
	9326
	A152
	A153
Figure 2e	7062
Figure 3a	8834
	9947
	7108
	9023
	148
Figure 2f	7062
	7108
	8834
	9947
	9023
	6344
Figure S2b	7062
	7108
	8834
	9947
	9023
	9325
Figure 3c	7062
	7108
	8834
	A330
	A332
	A372
	A377
	A364
	A368
	A388
	A393
Figure 3d	7062
	7108
	8834
	A330
	A372
	A364
	A388
Figure 3e	7062
	7108
	8834
	A330
	A372
	A364
	A388
Figure 3f	7062
	7108
	8834
	9023
	9325
	A330
Figure 3g	7062
	7108
	8834
	A330
	A332
	A372
	A377
	A364
	A368
	A388
	A393
Figure 3h	7062
	7108
	A330
	9325
	9350
	A457
	A458
Figure 3i	7062
	8834
	9325
	A457
	A458
Figure 3j	7062
	A116
	A330
	8834
	A211
	A569
	A570
Figure 4a	7062
	7108
	8834
	A330
	9023
Figure 4b	7062
	7108
	8834
	A330
	9023
Figure 4c	7062
	7108
	8834
	9947
	9023
	a330
	a508
Figure 4e	42
	10548
Figure 5a	7062
	7108
	8834
Figure 5b	42
	4392
	10548
Figure 5c	7062
	A192
	A194
	A195
	A196
	A237
	A239
Figure 5d	42
	A191
	A259
	A260
Figure 5e	7062
	10379
	A263
	A264
	A270
	A271
	A272
Figure 5f	7062
	10379
	A263
	A264
	A270
	A271
	A272
Figure 6a	7062
	7108
	8834
	A330
	42
	7095
	7096
	8736
	A302
	A513
Figure 6b	42
	7095
Figure 6c	42
	7095
	a513
	8736
	1798
Figure 6d	42
	9864
	8736
	A513
	A516
Figure 6e	42
	1798
	A513
	A516
	7095
	7096
Figure 6f	42
	7095
	7096
	8834
	9864
	A513
	A516
	4392
	9264
Figure 6g	42
	7095
	A513
Figure 6h	42
	7095
	7096
	A513
	A516
Figure S4	42
	7095
	7096
	A513
	7062
	7108
	A330

## Sheet: Genotypes
Strain	Ref	Genotype
PY 41		h+ ade6-210 arg3D4 his3D1 leu1-32 ura4D18
PY 42		h- ade6-210 arg3D4 his3D1 leu1-32 ura4D18
PY 148		h+ swi6::arg3 ura4DS/E his3D ade6? arg3D leu1-32 A8
PY 1798		h- clr4D::KanR ade6-210 leu1-32 ura4DS/E arg3D his3D
PY 4392		h+/90 set2D::KanR ade6-210 arg3D4 his3D1 leu1-32 ura4D18
PY 4507		h- epe1::KanMX6 ade6-210 arg3-D4 his3-D1 leu1-32 ura4-D18
PY 6926	FY1889 from Susan Forsburg	h- mst2D::ura4+ ade6-M216 leu1-31 ura4D18
PY 7059		h+ H3.1/H4.1::his3+ H3.3/H4.3::arg3+ ade6-210 arg3D1 his3D1 leu1-32 ura4D18?
PY 7062		h- H3.1/H4.1::his3 H3.3/H4.3::arg3 ade6-210 arg3D1 his3D1 leu1-32 ura4D18
PY 7095		h- H3.2 G34R leu1-32 ura4-D18 his3D1 arg3D1 ade6-210
PY 7097		h- H3.2 G34R leu1-32 ura4-D18 his3D1 arg3D1 ade6-210
PY 7096		h- H3.2 G34R leu1-32 ura4-D18 his3D1 arg3D1 ade6-210
PY 7108		h- H3.2 G34R H3.1/H4.1::his3 H3.3/H4.3::arg3 ade6-210 arg3D1 his3D1 leu1-32 ura4D18
PY 7662		h+ H3.2 G34R H3.1/H4.1::his3+ H3.3/H4.3::arg3+ ade6-210 his3D1 arg3D1 his3D1 leu1-32 ura4D18?
PY 8197	MS161 from Elena Hidalgo, Ref: Sanso et al., 2011, NAR 39:6369	h+ gcn5::NatMX6
PY 8271	br352	mat Msmt0 gcn5D::KanMX6 otr::ura4 ade6-210 his2 leu1-32 ura4DS/E
PY 8272	spj 1851 from Songtao Jia	mat Msmt0 mst2D::KanMX6 otr::ura4 ade6-210 his2 leu1-32 ura4DS/E
PY 8621	strain no 2901 from Matthew O’Connell	smt0 rhp51::KanR ade6-704 leu1-32 ura4D18
PY 8736		h- H3.2 G34V ade6-210 his3D1 arg3D1 leu1-32
PY 8834		h- H3.2 G34V H3.1/H4.1::his3 H3.3/H4.3::arg3 ade6-210 arg3D1 his3D1 ura4D18
PY 8835		h- H3.2 G34V H3.1/H4.1::his3 H3.3/H4.3::arg3 ade6-210 arg3D1 his3D1 ura4D18
PY 8848	strain 7027 from matthew O'Connell	h+ rtt109::KanMX4 ade6-210 or 216? leu1-32 ura4D18
PY 8944		h- rtt109::KanMX4 ade6-210 or 216? arg3D his3D leu1-32 ura4D18
PY 9023		h- set2D::KanR H3.1/H4.1::his3 H3.3/H4.3::arg3 ade6-210 arg3D1 his3D1 leu1-32 ura4D18
PY 9024		h- set2D::KanR H3.1/H4.1::his3 H3.3/H4.3::arg3 ade6-210 arg3D1 his3D1 leu1-32 ura4D18
PY 9066	SPK653 From Brian Strahl	h-set2-3x Flag-Kan cen1::ura4 ade6-210 leu1-32 ura4
PY 9135		h- Set2-3x Flag-Kan H3.1/H4.1::his3 H3.3/H4.3::arg3 ade6-210 arg3D1 his3D1 ura4D18?
PY 9136		h- Set2-3x Flag-Kan H3.1/H4.1::his3 H3.3/H4.3::arg3 ade6-210 arg3D1 his3D1 ura4D18?
PY 9138		h? Set2-3x Flag-Kan H3.2 G34R H3.1/H4.1::his3 H3.3/H4.3::arg3 ade6-210 arg3D1 his3D1 ura4-D18?
PY 9139		h? Set2-3x Flag-Kan H3.2 G34R H3.1/H4.1::his3 H3.3/H4.3::arg3 ade6-210 arg3D1 his3D1 ura4D18?
PY 9140		h- H3.1/H4.1::his3 H3.3/H4.3::arg3 [Ch16 ade6-216 m23::LEU2+] ade6-210 arg3D his3D leu1-32 ura4D18 or DS/E
PY 9142		h- H3.1/H4.1::his3 H3.3/H4.3::arg3 [Ch16 ade6-216 m23::LEU2+] ade6-210 arg3D his3D leu1-32 ura4-D18 or DS/E
PY 9144		h+/90? H3.2 K27M H3.1/H4.1::his3 H3.3/H4.3::arg3 [Ch16 ade6-216 m23::LEU2+] ade6-210 arg3D his3D leu1-32 ura4D18 or DS/E
PY 9145		h- H3.2 G34V H3.1/H4.1::his3 H3.3/H4.3::arg3 [Ch16 ade6-216 m23::LEU2+] ade6-210 arg3D his3D leu1-32 ura4D18 or DS/E
PY 9186		h- Set2-3x Flag-Kan H3.2 G34V H3.1/H4.1::his3 H3.3/H4.3::arg3 ade6-210 arg3D1 his3D1 ura4D18?
PY 9187		h+ Set2-3x Flag-Kan H3.2 G34V H3.1/H4.1::his3 H3.3/H4.3::arg3 ade6-210 arg3D1 his3D1 ura4D18?
PY 9189		h- H3.2 G34R H3.1/H4.1::his3 H3.3/H4.3::arg3 [Ch16 ade6-216 m23::LEU2+] ade6-210 arg3D his3D leu1-32 ura4D18 or DS/E
PY 9190		h- H3.2 G34R H3.1/H4.1::his3 H3.3/H4.3::arg3 [Ch16 ade6-216 m23::LEU2+] ade6-210 arg3D his3D leu1-32 ura4D18 or DS/E
PY 9264		smt0 rhp51::kanR ade6-210 arg3D leu1-32 ura4-D18
PY 9325		smt0 rhp51::KanR H3.1/H4.1::his3 H3.3/H4.3::arg3 ade6-210 or 704 arg3D his3D leu1-32 ura4D18
PY 9326		smt0 rhp51::KanR H3.1/H4.1::his3 H3.3/H4.3::arg3 ade6-210 or 704 arg3D his3D leu1-32 ura4D18
PY 9350		rhp51::kanR H3.2 G34R H3.1/H4.1::his3 H3.3/H4.3::arg3 ade6-210 ura4-D18 his3D arg3D leu1-32ade6-704?
PY 9352	6091 strain from Robin Allshire	h? H3.2 H3K9A [Ch16 ade6-216 m23::LEU2+] H3.1/H4.1::his3 H3.3/H4.3::arg3 ade6-210 arg3D1 his3D1 ura4-D18?
PY 9529		h- H3.1/H4.1::his3 H3.3/H4.3::arg3 [Ch16 ade6-216 m23::LEU2+] swi6::arg3 ade6-210 arg3D his3D leu1-32 ura4D18 or DS/E
PY 9530		h- H3.1/H4.1::his3 H3.3/H4.3::arg3 [Ch16 ade6-216 m23::LEU2+] swi6::arg3 ade6-210 arg3D his3D leu1-32 ura4D18 or DS/E
PY 9740		h- set2D::KanR H3.1/H4.1::his3 H3.3/H4.3::arg3 [Ch16 ade6-216 m23::LEU2+] ade6-210 arg3D his3D leu1-32 ura4D18 or DS/E
PY 9741		h- set2D::KanR H3.1/H4.1::his3 H3.3/H4.3::arg3 [Ch16 ade6-216 m23::LEU2+] ade6-210 arg3D his3D leu1-32 ura4D18 or DS/E
PY 9868		h- H3.2 G34V ade6-210 (ura4 D-18?) his3D1 arg3D1
PY 9947		h- H3.2 G34V H3.1/H4.1::his3+ H3.3/H4.3::arg3+ ade6-210 arg3D1 his3D1 ura4D18?
PY 9949		h- H3.2 G34V H3.1/H4.1::his3+ H3.3/H4.3::arg3+ ade6-210 arg3D1 his3D1 ura4D18?
PY 10080	YAM 231 from Atsushi Matsuda	h- hht2 K36A hht1-hhf1::KanR hht3-hhf3::NatR leu1 lys1 ura4
PY 10084		h- H3.2 G34V H3.1/H4.1::his3 H3.3/H4.3::arg3 [Ch16 ade6-216 m23::LEU2+] ade6-210 arg3D his3D leu1-32 ura4D18 or DS/E
PY 10148	From Anthony T. Annunziato, Boston College, Biology Dept.	h- KTP30 hat1D::KanR otr1R(dg-glu BamHI-SpeI fragment) sphI::ura4 ade6-210 leu1-32 ura4-DS/E
PY 10548		h+ mst2D::KanMX6 gcn5D::KanMX6 ade6-210 leu1-32 ura4D18
PY A69		h+ gcn5D::KanMX6 ade-210 arg3-D4 his3D1 leu1-32 ura4D18
PY A73		h+ mst2D::KanMX6 ade-210 arg3-D4 his3D1 leu1-32 ura4D18
PY A116		ku70::ura H3.1/H4.1::his3 H3.3/H4.3::arg3 ade6-210 arg3D1 his3D1 leu1-32 ura4D18
PY A145		h- H3.2 G34V set2D::KanR H3.1/H4.1::his3 H3.3/H4.3::arg3 ade6-210 arg3D1 his3D1 ura4D18
PY A146		h- H3.2 G34V set2D::KanR H3.1/H4.1::his3 H3.3/H4.3::arg3 ade6-210 arg3D1 his3D1 ura4D18
PY A152		H3.2 G34V rhp51::KanR H3.1/H4.1::his3 H3.3/H4.3::arg3 ade6-210 or 704 arg3D his3D leu1-32 ura4D18
PY A153		H3.2 G34V rhp51::KanR H3.1/H4.1::his3 H3.3/H4.3::arg3 ade6-210 or 704 arg3D his3D leu1-32 ura4D18
PY A191	ST2915 from J. Kanoh	h- Sgo2-3x Flag:KanR
PY A192		h- Sgo2-3x Flag:KanR hht1-hhf1::KanR hht3-hhf3::NatR leu1-32 lys? ura4D18
PY A194		h- Sgo2-3x Flag:KanR hht1-hhf1::KanR hht3-hhf3::NatR leu1-32 lys? ura4D18
PY A195		h- Sgo2-3x Flag:KanR H3.2 G34R hht1-hhf1::KanR hht3-hhf3::NatR leu1-32 lys? ura4D18?
PY A196		h- Sgo2-3x Flag:KanR H3.2 G34R hht1-hhf1::KanR hht3-hhf3::NatR leu1-32 lys? ura4D18?
PY A211		h- ku70::ura H3.2 G34V H3.1/H4.1::his3+ H3.3/H4.3::arg3+ ade6-210 (ura4-D18?) his3D1 arg3D1
PY A237		h- H3.2 G34V Sgo2-3x Flag:KanR hht1-hhf1::KanR hht3-hhf3::NatR leu1-32? lys? ura4D18?
PY A239		h- H3.2 G34V Sgo2-3x Flag:KanR hht1-hhf1::KanR hht3-hhf3::NatR leu1-32? lys? ura4D18?
PY A240		h- set2D::KanR Sgo2-3x Flag:KanR ade210? his3-D? leu1-32? ura4D18 or DS/E
PY A241		h- set2D::KanR Sgo2-3x Flag:KanR ade210? his3-D? leu1-32? ura4DD18 or DS/E
PY A243		h- gcn5D::KanMX6 Sgo2-3x Flag:KanR ade210? his3-D? leu1-32? ura4D18 or DS/E
PY A244		h- gcn5D::KanMX6 Sgo2-3x Flag:KanR ade210? his3-D? leu1-32? ura4D18 or DS/E
PY A247		h- mst2D::KanMX6 Sgo2-3x Flag:KanR ade210? his3-D? leu1-32? ura4D18 or DS/E
PY A248		h- mst2D::KanMX6 Sgo2-3x Flag:KanR ade210? his3-D? leu1-32? ura4D18 or DS/E
PY A259		h- gcn5D::KanMX6 mst2D::KanMX6 Sgo2-3x Flag:KanR ade210? his3-D? leu1-32? ura4D18 or DS/E
PY A260		h- gcn5D::KanMX6 mst2D::KanMX6 Sgo2-3x Flag:KanR ade210? his3-D? leu1-32? ura4D18 or DS/E
PY A302		h+ H3.2 G34K ade6-210 arg3D1 his3D1 leu1-32 ura4-D18
PY A303		h+ H3.2 G34K ade6-210 arg3D1 his3D1 leu1-32 ura4-D18
PY A304		h+ H3.2 G34K ade6-210 arg3D1 his3D1 leu1-32 ura4-D18
PY A330		h- H3.2 G34K H3.1/H4.1::his3 H3.3/H4.3::arg3 ade6-210 arg3D1 his3D1 leu1-32 ura4-D18
PY A331		h- H3.2 G34K H3.1/H4.1::his3 H3.3/H4.3::arg3 ade6-210 arg3D1 his3D1 leu1-32 ura4-D18
PY A332		h- H3.2 G34K H3.1/H4.1::his3 H3.3/H4.3::arg3 ade6-210 arg3D1 his3D1 leu1-32 ura4-D18
PY A364		h- H3.2 G34W H3.1/H4.1::his3 H3.3/H4.3::arg3 ade6-210 ura4 D-18 his3D1 arg3D1 Leu1-32
PY A368		h- H3.2 G34W H3.1/H4.1::his3 H3.3/H4.3::arg3 ade6-210 ura4 D-18 his3D1 arg3D1 Leu1-32
PY A372		h- H3.2 G34M H3.1/H4.1::his3 H3.3/H4.3::arg3 ade6-210 ura4 D-18 his3D1 arg3D1 Leu1-32
PY A377		h- H3.2 G34M H3.1/H4.1::his3 H3.3/H4.3::arg3 ade6-210 ura4 D-18 his3D1 arg3D1 Leu1-32
PY A388		h- H3.2 G34Q H3.1/H4.1::his3 H3.3/H4.3::arg3 ade6-210 ura4 D-18 his3D1 arg3D1 Leu1-32
PY A393		h- H3.2 G34Q H3.1/H4.1::his3 H3.3/H4.3::arg3 ade6-210 ura4 D-18 his3D1 arg3D1 Leu1-32
PY A457		rhp51::kanR H3.2 G34K H3.1/H4.1::his3 H3.3/H4.3::arg3 ade6-210 ura4-D18 his3D arg3D leu1-32ade6-704?
PY A458		rhp51::kanR H3.2 G34K H3.1/H4.1::his3 H3.3/H4.3::arg3 ade6-210 ura4-D18 his3D arg3D leu1-32ade6-704?
PY A508		h- H3.2 G34K H3.1/H4.1::his3 H3.3/H4.3::arg3 ade6-210 arg3D1 his3D1 leu1-32 ura4-D18
PY A509		h- H3.2 G34K H3.1/H4.1::his3 H3.3/H4.3::arg3 ade6-210 arg3D1 his3D1 leu1-32 ura4-D18
PY A513		h- H3.2 G34K ade6-210 arg3D1 his3D1 leu1-32 ura4-D18
PY A516		h- H3.2 G34K ade6-210 arg3D1 his3D1 leu1-32 ura4-D18
PY A569		h- ku70::ura H3.2 G34K H3.1/H4.1::his3+ H3.3/H4.3::arg3+ade6-210 arg3D1 his3D1 leu1-32 ura4-D18
PY A570		h- ku70::ura H3.2 G34K H3.1/H4.1::his3+ H3.3/H4.3::arg3+ade6-210 arg3D1 his3D1 leu1-32 ura4-D18
PY A792		h- sgo2-3flag:Kanr H3.2 G34K hht1-hhf1::kanr hht3-hhf3::natr leu1-32 ura4-d18
PY A793		h- sgo2-3flag:Kanr H3.2 G34K hht1-hhf1::kanr hht3-hhf3::natr leu1-32 ura4-d18
