# Supplementary material for: Surprising phenotypic diversity of cancer-associated mutations of Gly 34 in the histone H3 tail
Source: eLife. 2021 Feb 1;10:e65369. doi: 10.7554/eLife.65369 (PMC7872514; doi:10.7554/eLife.65369)
Supplement: Supplementary file 4. [file elife-65369-supp4.xlsx]

## Sheet: DE genes
G34K	Sample IDs	Total DE genes	DE UP-regulated (relative to WT)	DE DOWN-regulated (relative to WT)
Single-copy	BRL141-155	223	128	95
Triple-copy	BRL200-211	142	73	69
G34R	Sample IDs	Total DE genes	DE UP-regulated (relative to WT)	DE DOWN-regulated (relative to WT)
Single-copy	BRL141-155	160	78	82
Triple-copy	BRL200-211	54	24	30
G34V	Sample IDs	Total DE genes	DE UP-regulated (relative to WT)	DE DOWN-regulated (relative to WT)
Single-copy	BRL141-155	183	94	89
Set2D	Sample IDs	Total DE genes	DE UP-regulated (relative to WT)	DE DOWN-regulated (relative to WT)
Single-copy	BRL141-155	478	325	153
Threshold: FDR < 0.05 and FC > 1.5

## Sheet: single copy G34V vs WT_genelist
geneID	Gene.name	log2FC	log2AveExpr	P.Value	FDR	chr	start	end
SPBTRNAASN.02	SPBTRNAASN.02	-2.89	-3.39	0.000109081	0.00118743	II	2032160	2032233
SPBC1289.14	SPBC1289.14	-1.96	4.74	3.22881e-13	8.11586e-10	II	4412072	4413599
SPAPB1A11.02	SPAPB1A11.02	-1.87	1.68	1.34708e-09	2.68395e-07	I	2980428	2981839
SPCC737.04	SPCC737.04	-1.84	5.08	5.19996e-11	2.10901e-08	III	1891328	1893817
SPNCRNA.869	SPNCRNA.869	-1.8	0.61	8.34881e-10	2.03309e-07	I	2979599	2980606
SPBCPT2R1.08c	tlh2	-1.56	3.95	9.46486e-10	2.22255e-07	II	4526885	4532899
SPBC83.19c	SPBC83.19c	-1.5	-1.85	1.397e-05	0.000260946	II	1541452	1541903
SPBPB21E7.04c	SPBPB21E7.04c	-1.48	6.47	1.22497e-09	2.68395e-07	II	64487	65620
SPNCRNA.1304	SPNCRNA.1304	-1.44	4.71	7.41066e-09	8.85911e-07	II	65390	66274
SPBC19C7.04c	SPBC19C7.04c	-1.42	6.82	3.69452e-07	1.8128e-05	II	2825251	2826700
SPNCRNA.1122	SPNCRNA.1122	-1.34	0.93	1.39294e-07	9.34549e-06	III	258116	258797
SPNCRNA.61	prl61	-1.24	1.48	7.29875e-07	2.9623e-05	I	5546205	5546648
SPCC548.02c	wtf3	-1.22	-0.46	1.00124e-05	0.000201205	III	219185	220283
SPNCRNA.318	SPNCRNA.318	-1.2	-1.91	0.000257816	0.00221813	II	605716	606557
SPNCRNA.1223	SPCC191.10-antisense-1	-1.19	0.64	0.000313607	0.00256782	III	1721177	1722876
SPCC191.10	SPCC191.10	-1.18	0.01	0.000480084	0.00349951	III	1721489	1722397
SPNCRNA.175	SPNCRNA.175	-1.16	-1.18	3.94214e-05	0.000555023	I	1573772	1574466
SPAC26H5.08c	bgl2	-1.13	6	1.20849e-05	0.000233701	I	4134378	4136031
SPNCRNA.1553	SPNCRNA.1553	-1.07	4.23	1.99778e-06	6.19593e-05	II	2826631	2828674
SPAC27D7.11c	SPAC27D7.11c	-1.04	7.16	2.84017e-05	0.000436311	I	4529389	4531031
SPAC186.07c	SPAC186.07c	-1.03	2.18	2.6678e-07	1.43777e-05	I	5545615	5546613
SPAPB1A11.03	SPAPB1A11.03	-1.02	4.86	4.75314e-11	2.10901e-08	I	2984439	2986118
SPAC637.03	SPAC637.03	-1	5.76	1.11564e-05	0.000219621	I	4542091	4543533
SPNCRNA.1190	SPNCRNA.1190	-0.99	3.2	1.51579e-10	5.24544e-08	III	1371577	1372674
SPNCRNA.147	SPNCRNA.147	-0.98	-1.09	0.000863852	0.00542656	I	135569	135926
SPAC27D7.09c	SPAC27D7.09c	-0.97	2.27	1.082e-06	3.97439e-05	I	4523298	4524731
SPNCRNA.650	SPNCRNA.650	-0.93	1.19	0.00147347	0.00794757	I	453735	455859
SPAC977.16c	dak2	-0.91	5.46	3.77809e-05	0.00053885	I	64559	66980
SPAC869.02c	SPAC869.02c	-0.9	6.9	1.46396e-07	9.53026e-06	I	5517865	5519950
SPNCRNA.996	SPNCRNA.996	-0.89	3.08	9.41958e-06	0.000191154	I	4531144	4532754
SPAC18B11.04	ncs1	-0.88	6.04	1.67278e-09	3.0183e-07	I	310157	311712
SPNCRNA.451	SPNCRNA.451	-0.88	0.54	0.000445835	0.00331603	III	49802	50142
SPAC3G6.07	SPAC3G6.07	-0.87	1.27	0.000498499	0.00359238	I	5392191	5392898
SPAC977.18	SPAC977.18	-0.87	2.14	0.00106957	0.00628453	I	31140	32345
SPBPB2B2.18	SPBPB2B2.18	-0.87	1.91	0.000199768	0.00185029	II	4502692	4503664
SPNCRNA.1120	SPNCRNA.1120	-0.87	1.15	0.00895296	0.0316994	III	230600	231934
SPAC977.17	SPAC977.17	-0.86	4.69	2.92249e-05	0.000445832	I	66219	69821
SPAC869.06c	SPAC869.06c	-0.86	1.38	0.000790396	0.00507505	I	5502560	5503291
SPNCRNA.217	SPNCRNA.217	-0.84	-0.55	0.000439742	0.00327441	I	3158482	3159120
SPNCRNA.397	SPNCRNA.397	-0.83	1.63	0.000220077	0.00198764	II	2472439	2472537
SPAC15A10.09c	pun1	-0.82	5.45	5.40367e-07	2.2922e-05	I	3694974	3696517
SPNCRNA.995	SPNCRNA.995	-0.81	3.71	2.11869e-05	0.000354462	I	4531036	4532486
SPAC3G9.11c	SPAC3G9.11c	-0.81	8.69	0.000183268	0.00176425	I	3159753	3162245
SPNCRNA.417	SPNCRNA.417	-0.81	1.42	5.61205e-06	0.000133933	II	3241812	3242520
SPAC15A10.10	mde6	-0.8	5.54	1.47309e-09	2.8487e-07	I	3696549	3700027
SPAC20G4.03c	hri1	-0.8	6.2	3.83007e-06	0.000102787	I	4818012	4820749
SPAPJ691.02	SPAPJ691.02	-0.78	3.8	5.6425e-06	0.000133933	I	5187647	5189187
SPAC22F8.03c	SPAC22F8.03c	-0.78	-0.85	0.00107606	0.00631707	I	4788494	4788895
SPBC1E8.05	SPBC1E8.05	-0.78	8.19	0.000984835	0.00592975	II	1970612	1972799
SPCC1235.12c	mug146	-0.78	2.15	4.61938e-07	2.05219e-05	III	201551	202707
SPAC4H3.08	SPAC4H3.08	-0.77	3.98	3.40084e-09	4.65844e-07	I	3841498	3843136
SPAC22H10.06c	SPAC22H10.06c	-0.77	0.41	0.00122788	0.00696574	I	2381320	2381601
SPBC839.06	cta3	-0.76	6.13	5.59259e-05	0.00071679	II	607214	611989
SPAC26H5.09c	SPAC26H5.09c	-0.75	6.82	2.87537e-06	8.32845e-05	I	4137266	4139080
SPNCRNA.940	SPNCRNA.940	-0.74	-0.98	0.00219962	0.0108625	I	3840750	3841441
SPCC330.19c	SPCC330.19c	-0.74	2.55	6.96901e-08	5.48561e-06	III	107859	108710
SPNCRNA.1106	SPCC330.19c-antisense-1	-0.74	2.53	7.09167e-08	5.48561e-06	III	107963	108780
SPAC22H10.13	zym1	-0.73	5.79	1.46239e-06	4.98198e-05	I	2381690	2382200
SPAC11E3.13c	gas5	-0.72	7.06	0.00299529	0.0136575	I	5306742	5309063
SPBC119.03	SPBC119.03	-0.72	7.5	1.69851e-09	3.0183e-07	II	717888	718991
SPAC2F7.11	nrd1	-0.71	6.2	0.00162477	0.00857373	I	555277	559051
SPBC12C2.04	SPBC12C2.04	-0.71	6.87	1.25922e-06	4.49965e-05	II	2468858	2470506
SPAC19G12.10c	cpy1	-0.69	10.91	4.88379e-10	1.41828e-07	I	4061377	4064952
SPNCRNA.928	meu16	-0.69	5.26	7.85715e-09	9.22513e-07	I	3697473	3700084
SPAPB24D3.07c	SPAPB24D3.07c	-0.69	6.47	5.2502e-08	4.60268e-06	I	2957839	2959192
SPAC1687.16c	erg31	-0.69	5.34	0.00021903	0.00198364	I	932425	934021
SPNCRNA.699	SPNCRNA.699	-0.68	1.71	2.71321e-06	7.964e-05	I	948715	949365
SPAC4G9.22	SPAC4G9.22	-0.68	7.17	0.000636167	0.00436335	I	2291666	2292778
SPNCRNA.1374	cta3-antisense-1	-0.68	6	4.54112e-05	0.000618175	II	608000	611638
SPNCRNA.1219	SPNCRNA.1219	-0.68	3.54	0.00609601	0.0237498	III	1705006	1706081
SPAC13C5.05c	SPAC13C5.05c	-0.67	5.83	5.4158e-12	5.08698e-09	I	431367	433274
SPBC2F12.11c	rep2	-0.66	5.66	9.51494e-07	3.58321e-05	II	1717715	1719322
SPBC30B4.01c	wsc1	-0.66	5.83	0.00101233	0.00604001	II	1297676	1301328
SPBC119.05c	lsb1	-0.65	6.3	3.66527e-06	9.8767e-05	II	721007	722432
SPBC530.07c	SPBC530.07c	-0.65	8.07	2.22973e-05	0.000366512	II	804139	805686
SPCC191.01	SPCC191.01	-0.65	6.14	0.00145787	0.00791535	III	1705817	1707734
SPNCRNA.253	SPNCRNA.253	-0.64	2.14	0.0151121	0.0476099	I	4787154	4787928
SPAC2F3.01	imt1	-0.63	5.99	2.3572e-09	3.49719e-07	I	3922354	3923496
SPAC11E3.12	SPAC11E3.12	-0.62	7.27	0.00239141	0.011536	I	5305696	5308686
SPNCRNA.1323	SPBC1198.07c-antisense-1	-0.62	5.15	9.85244e-08	7.44595e-06	II	185042	186959
SPBC1198.07c	SPBC1198.07c	-0.62	5.16	1.23478e-07	8.54598e-06	II	184591	186786
SPCC757.12	SPCC757.12	-0.62	7.03	0.000596473	0.00415446	III	72916	75522
SPBC16E9.16c	lsd90	-0.61	7.1	0.00121648	0.00692496	II	1947985	1950255
SPNCRNA.1218	SPNCRNA.1218	-0.61	0.9	0.000425529	0.00318299	III	1704099	1705906
SPAC23H3.15c	SPAC23H3.15c	-0.6	7.42	0.000184273	0.00176876	I	2523372	2524734
SPNCRNA.832	SPAC23H3.15c-antisense-1	-0.6	7.39	0.000200814	0.00185704	I	2523434	2525232
SPBC887.15c	sur2	-0.59	6.91	0.000958034	0.00581632	II	3570849	3572677
SPNCRNA.394	SPNCRNA.394	-0.59	-0.42	0.0103711	0.0354603	II	2198477	2199461
SPCC1183.09c	pmp31	-0.59	5.62	4.46636e-05	0.000611645	III	612760	613998
SPBC725.06c	ppk31	0.59	6.98	8.99064e-12	7.07809e-09	II	1212690	1216671
SPNCRNA.1421	ppk3-antisense-1	0.59	6.99	9.68864e-12	7.07809e-09	II	1212519	1216202
SPBP22H7.09c	mis15	0.59	4.92	1.63826e-06	5.46779e-05	II	1448815	1450155
SPNCRNA.1107	SPNCRNA.1107	0.59	-0.03	0.00149618	0.00803707	III	108832	109337
SPAC11D3.06	SPAC11D3.06	0.61	6.4	2.35306e-09	3.49719e-07	I	116331	118189
SPNCRNA.488	SPNCRNA.488	0.61	2.19	7.98762e-05	0.000937832	III	1337438	1337811
SPAC1002.19	urg1	0.62	7.92	1.54587e-05	0.000280776	I	1835270	1837060
SPAP7G5.06	per1	0.62	6.54	4.98009e-05	0.000654881	I	3748767	3751729
SPBC1348.07	SPBC1348.07	0.63	0.36	0.00684228	0.0259094	II	19395	20606
SPCPB1C11.03	SPCPB1C11.03	0.63	7.66	5.88773e-06	0.000138256	III	2076393	2079003
SPNCRNA.481	SPNCRNA.481	0.63	-0.55	0.0108674	0.0368505	III	1068658	1068746
SPAC10F6.15	SPAC10F6.15	0.64	4.03	3.4546e-06	9.46417e-05	I	1235601	1237035
SPNCRNA.281	SPNCRNA.281	0.64	0.22	0.00622612	0.0241088	I	5516331	5516951
SPNCRNA.1310	SPNCRNA.1310	0.66	0.34	0.000708016	0.00469275	II	109405	109905
SPAC212.11	tlh1	0.67	0.9	0.00241548	0.011601	I	1	5662
SPNCRNA.121	SPNCRNA.121	0.67	-2.64	0.0102218	0.0350409	III	2308667	2308904
SPNCRNA.299	SPNCRNA.299	0.68	-0.32	0.000953324	0.00579843	II	274745	275832
SPNCRNA.871	SPNCRNA.871	0.7	4.25	1.09365e-10	3.99484e-08	I	2996868	2998123
SPAC1A6.08c	mug125	0.7	3.77	2.50811e-09	3.58497e-07	I	1086242	1087505
SPBC1348.05	SPBC1348.05	0.7	0.59	0.00566148	0.0224513	II	13572	15378
SPNCRNA.454	SPNCRNA.454	0.7	1.64	1.08688e-07	7.89312e-06	III	76513	77990
SPNCRNA.1262	SPNCRNA.1262	0.7	1.28	0.0006784	0.00456082	III	2107549	2108268
SPNCRNA.781	SPNCRNA.781	0.71	4.64	1.27245e-09	2.68395e-07	I	1954820	1956332
SPBC1348.04	SPBC1348.04	0.71	-0.31	0.0045424	0.018725	II	12176	12750
SPAC750.05c	SPAC750.05c	0.72	3.73	2.73539e-08	2.76695e-06	I	5565881	5567337
SPAC22F3.12c	rgs1	0.73	5.01	2.35483e-07	1.33474e-05	I	679062	681890
SPAC750.03c	SPAC750.03c	0.73	1.51	5.20877e-06	0.000126843	I	5562608	5563045
SPNCRNA.21	prl21	0.73	-0.29	0.00591686	0.0232537	I	5454229	5454498
SPBC359.01	SPBC359.01	0.73	5.38	1.02331e-09	2.32008e-07	II	104609	107221
SPNCRNA.782	SPNCRNA.782	0.74	1.59	4.01034e-07	1.89698e-05	I	1955847	1956372
SPNCRNA.1303	SPNCRNA.1303	0.74	0.62	0.00248654	0.0118729	II	63602	64286
SPCC1223.09	SPCC1223.09	0.74	5.41	2.30051e-05	0.000375331	III	1857150	1858621
SPCTRNAILE.09	SPCTRNAILE.09	0.74	-2.46	0.00383123	0.0164535	III	817425	817498
SPAC186.06	SPAC186.06	0.75	4.51	4.40231e-07	2.00752e-05	I	5542290	5543031
SPBPJ4664.02	SPBPJ4664.02	0.76	6.41	0.000388204	0.00300641	II	687626	699886
SPNCRNA.512	SPNCRNA.512	0.76	0.38	0.000234051	0.0020761	III	2107603	2107915
SPAC31G5.07	dni1	0.77	3.65	1.9796e-09	3.1746e-07	I	2997453	2998157
SPAC977.06	SPAC977.06	0.77	0.27	0.000128847	0.00134258	I	39416	40072
SPBC359.03c	aat1	0.78	8.14	2.28806e-11	1.36764e-08	II	111007	113472
SPNCRNA.287	SPNCRNA.287	0.78	0.6	0.000539365	0.00384217	II	21060	21754
SPAC869.03c	SPAC869.03c	0.79	1.2	0.00138371	0.00763249	I	5512757	5514865
SPAC3G9.01	nsk1	0.81	4.88	7.05055e-08	5.48561e-06	I	3181430	3183290
SPAC9E9.01	SPAC9E9.01	0.81	-0.19	0.0012352	0.00699509	I	4434861	4435509
SPNCRNA.291	SPNCRNA.291	0.83	3.44	6.5146e-10	1.71334e-07	II	103165	104528
SPNCRNA.406	SPNCRNA.406	0.84	0.39	3.87839e-05	0.000549578	II	2738941	2739592
SPNCRNA.601	SPNCRNA.601	0.85	1.28	4.70444e-05	0.000634435	I	40916	41770
SPNCRNA.136	SPNCRNA.136	0.85	1.27	5.32279e-05	0.000683807	I	40795	41489
SPBPB2B2.05	SPBPB2B2.05	0.85	3.9	3.28505e-06	9.07529e-05	II	4466517	4467612
SPBC460.05	SPBC460.05	0.95	5	6.38462e-07	2.65689e-05	AB325691	16470	18062
SPNCRNA.935	SPNCRNA.935	0.95	7.73	4.21654e-09	5.54475e-07	I	3745778	3748833
SPNCRNA.934	SPNCRNA.934	0.95	7.75	5.01962e-09	6.34693e-07	I	3745764	3748595
SPBPB2B2.01	SPBPB2B2.01	0.97	5.07	3.57987e-07	1.79677e-05	II	4457661	4459842
SPCC569.01c	SPCC569.01c	0.98	4.83	1.34218e-09	2.68395e-07	III	2434691	2436530
SPNCRNA.860	SPNCRNA.860	0.99	3.07	3.31304e-09	4.63473e-07	I	2931622	2932800
SPAC212.10	SPAC212.10	1	-0.69	1.217e-05	0.00023397	I	5726	6331
SPNCRNA.480	SPNCRNA.480	1.01	0.56	1.41529e-05	0.000263612	III	1066011	1066485
SPAPB24D3.03	SPAPB24D3.03	1.02	6.72	7.25467e-09	8.83324e-07	I	2952226	2953762
SPAC2E1P3.05c	SPAC2E1P3.05c	1.04	6.43	2.86807e-08	2.81456e-06	I	2935116	2937079
SPNCRNA.360	SPNCRNA.360	1.04	-2.64	0.0118982	0.0394903	II	1606372	1609066
SPAC212.07c	SPAC212.07c	1.05	2.07	1.61124e-07	1.01857e-05	I	13665	14555
SPNCRNA.117	SPNCRNA.117	1.05	-1.12	0.000271108	0.00228718	II	4439928	4440156
SPAC186.01	pfl9	1.06	2.47	3.57561e-07	1.79677e-05	I	5527462	5528959
SPAC750.06c	SPAC750.06c	1.07	1.97	1.61272e-06	5.43776e-05	I	5568903	5569803
SPNCRNA.861	SPNCRNA.861	1.08	4.42	3.59957e-12	3.94453e-09	I	2937952	2939052
SPNCRNA.292	SPNCRNA.292	1.1	0.3	3.66278e-05	0.000525825	II	114092	114583
SPAC2E1P3.04	cao1	1.11	7.17	1.816e-13	8.11586e-10	I	2931763	2935115
SPBC359.02	alr2	1.11	6.59	4.97695e-10	1.41828e-07	II	107583	109353
SPNCRNA.1309	alr2-antisense-1	1.11	6.56	5.17699e-10	1.41828e-07	II	107514	108774
SPAC869.04	SPAC869.04	1.14	1.11	0.00287243	0.0132164	I	5511137	5512369
SPAC869.01	SPAC869.01	1.15	2.47	1.35801e-06	4.7243e-05	I	5521275	5523181
SPAC212.06c	SPAC212.06c	1.16	1.48	6.06476e-08	5.04757e-06	I	18042	18974
SPNCRNA.70	SPNCRNA.70	1.18	-0.8	5.32486e-05	0.000683807	I	11027	11556
SPATRNALYS.01	SPATRNALYS.01	1.18	-2.3	0.00498717	0.0202411	I	1704582	1704664
SPBPB2B2.08	SPBPB2B2.08	1.22	3.63	5.64029e-08	4.81622e-06	II	4475953	4476674
SPNCRNA.863	SPNCRNA.863	1.33	8.95	3.29843e-12	3.94453e-09	I	2939138	2940765
SPAC977.03	SPAC977.03	1.33	-1.42	0.000353032	0.00280337	I	33835	34272
SPNCRNA.862	SPNCRNA.862	1.38	8.69	2.21673e-12	3.64375e-09	I	2938121	2939967
SPBPB10D8.01	SPBPB10D8.01	1.4	4.89	3.72531e-09	4.99875e-07	II	80899	83357
SPAC212.04c	SPAC212.04c	1.41	4	6.66086e-08	5.40681e-06	I	21381	23050
SPNCRNA.284	SPNCRNA.284	1.42	-0.72	0.000246705	0.00215416	I	5525499	5525873
SPBPB2B2.07c	SPBPB2B2.07c	1.53	-1.1	6.7472e-05	0.000823058	II	4474145	4474931
SPAC212.08c	SPAC212.08c	1.61	2.3	5.45296e-11	2.10901e-08	I	11784	12994
SPBC359.04c	pfl7	1.64	4.23	3.70306e-13	8.11586e-10	II	117892	121286
SPAC212.12	SPAC212.12	1.67	3.99	9.34833e-09	1.05975e-06	I	15855	16226
SPBPB10D8.02c	SPBPB10D8.02c	1.76	5.17	2.55806e-11	1.4016e-08	II	83229	85631
SPNCRNA.293	SPNCRNA.293	1.76	2.35	1.74566e-10	5.73887e-08	II	120577	121643
SPNCRNA.283	SPNCRNA.283	1.8	-1.76	2.04324e-05	0.000344543	I	5524889	5525299
SPNCRNA.1307	SPBPB10D8.02c-antisense-1	1.8	4.95	3.10208e-11	1.56894e-08	II	83799	85528
SPAC212.09c	SPAC212.09c	2.11	-0.43	4.99667e-07	2.19021e-05	I	7619	9274
SPBPB10D8.03	SPBPB10D8.03	2.18	1.47	5.29759e-11	2.10901e-08	II	87727	89029
SPNCRNA.1299	SPNCRNA.1299	3.05	0.06	0.00347663	0.0152494	III	2448764	2449506
SPRRNA.42	SPRRNA.42	5.19	-2.73	0.00600656	0.0235499	III	1	1390
SPCC1494.11c	Tf2-13	5.27	2.55	1.2209e-11	8.02742e-09	III	2320320	2324320
SPRRNA.52	SPRRNA.52	6.4	-1.81	0.00274106	0.0127277	III	2443248	2443412
FDR 05_ FC1.5

## Sheet: single copy G34K vs WT_genelist
geneID	Gene.name	log2FC	log2AveExpr	P.Value	FDR	chr	start	end
SPBC1289.14	SPBC1289.14	-2.37	4.74	1.25357e-13	4.12113e-10	II	4412072	4413599
SPBPB21E7.04c	SPBPB21E7.04c	-1.92	6.47	8.50026e-11	7.98417e-08	II	64487	65620
SPNCRNA.1304	SPNCRNA.1304	-1.86	4.71	1.11294e-09	2.52331e-07	II	65390	66274
SPAC869.02c	SPAC869.02c	-1.53	6.9	2.91099e-10	9.89642e-08	I	5517865	5519950
SPNCRNA.61	prl61	-1.51	1.48	1.99413e-07	8.62592e-06	I	5546205	5546648
SPAC186.07c	SPAC186.07c	-1.41	2.18	2.25318e-08	1.82897e-06	I	5545615	5546613
SPAC26H5.08c	bgl2	-1.41	6	1.65703e-06	4.25585e-05	I	4134378	4136031
SPCP20C8.03	SPCP20C8.03	-1.17	2.54	1.6723e-10	9.82096e-08	III	32624	33393
SPNCRNA.205	SPNCRNA.205	-1.11	-0.49	0.00226373	0.00888067	I	2738681	2740459
SPNCRNA.1423	SPNCRNA.1423	-1.09	-2.62	0.00199796	0.00806419	II	1264114	1264873
SPNCRNA.296	SPNCRNA.296	-1.09	-1.85	0.0153992	0.0405162	II	140474	141087
SPAC22F8.03c	SPAC22F8.03c	-1.08	-0.85	0.000115125	0.000920861	I	4788494	4788895
SPNCRNA.869	SPNCRNA.869	-1.02	0.61	3.49552e-07	1.33622e-05	I	2979599	2980606
SPAC27D7.09c	SPAC27D7.09c	-1.02	2.27	1.26564e-06	3.49646e-05	I	4523298	4524731
SPAC869.07c	mel1	-1.02	2.83	2.88856e-06	6.12654e-05	I	5499768	5501236
SPNCRNA.115	SPNCRNA.115	-1.01	-2.72	0.0059344	0.0188861	II	3379891	3379982
SPAPB1A11.03	SPAPB1A11.03	-1	4.86	9.73213e-11	7.9986e-08	I	2984439	2986118
SPAPB1A11.02	SPAPB1A11.02	-1	1.68	7.52924e-07	2.38613e-05	I	2980428	2981839
SPAC18B11.04	ncs1	-0.99	6.04	5.26302e-10	1.49922e-07	I	310157	311712
SPNCRNA.699	SPNCRNA.699	-0.99	1.71	1.0793e-07	5.33567e-06	I	948715	949365
SPAC637.03	SPAC637.03	-0.99	5.76	1.68033e-05	0.000217056	I	4542091	4543533
SPNCRNA.417	SPNCRNA.417	-0.97	1.42	1.48427e-06	3.9351e-05	II	3241812	3242520
SPAC4H3.08	SPAC4H3.08	-0.95	3.98	5.79147e-10	1.49922e-07	I	3841498	3843136
SPNCRNA.397	SPNCRNA.397	-0.94	1.63	0.000120361	0.000946621	II	2472439	2472537
SPNCRNA.287	SPNCRNA.287	-0.93	0.6	0.000806347	0.00403481	II	21060	21754
SPAC22F8.02c	pvg5	-0.91	4.8	0.00163756	0.00692409	I	4785162	4786280
SPBC83.19c	SPBC83.19c	-0.89	-1.85	0.00115445	0.00526799	II	1541452	1541903
SPBPB8B6.03	fah1	-0.87	3.55	3.84599e-06	7.59381e-05	II	47056	49071
SPBC30B4.01c	wsc1	-0.87	5.83	0.000130427	0.000998322	II	1297676	1301328
SPNCRNA.1219	SPNCRNA.1219	-0.87	3.54	0.0017543	0.00730035	III	1705006	1706081
SPNCRNA.253	SPNCRNA.253	-0.85	2.14	0.00413113	0.0141617	I	4787154	4787928
SPNCRNA.1302	eno102-antisense-1	-0.83	6.18	2.50525e-06	5.52753e-05	II	58453	59684
SPBPB21E7.01c	eno102	-0.83	6.21	2.53496e-06	5.55579e-05	II	58136	59704
SPBPB8B6.04c	grt1	-0.81	4.9	2.47134e-07	1.01557e-05	II	47369	51220
SPNCRNA.136	SPNCRNA.136	-0.81	1.27	0.000719368	0.00372305	I	40795	41489
SPBC2F12.11c	rep2	-0.8	5.66	1.57701e-07	7.09866e-06	II	1717715	1719322
SPNCRNA.650	SPNCRNA.650	-0.8	1.19	0.00484317	0.0160663	I	453735	455859
SPAC26H5.09c	SPAC26H5.09c	-0.79	6.82	1.63917e-06	4.24313e-05	I	4137266	4139080
SPNCRNA.601	SPNCRNA.601	-0.79	1.28	0.00079	0.00397418	I	40916	41770
SPBC1E8.05	SPBC1E8.05	-0.79	8.19	0.00082595	0.00409858	II	1970612	1972799
SPBC19C7.04c	SPBC19C7.04c	-0.78	6.82	0.000188189	0.00132478	II	2825251	2826700
SPNCRNA.147	SPNCRNA.147	-0.78	-1.09	0.0048168	0.0160195	I	135569	135926
SPCC737.04	SPCC737.04	-0.77	5.08	8.07177e-07	2.47999e-05	III	1891328	1893817
SPAC11E3.13c	gas5	-0.77	7.06	0.00176388	0.00732165	I	5306742	5309063
SPAC977.18	SPAC977.18	-0.77	2.14	0.00317104	0.0115456	I	31140	32345
SPAC186.08c	SPAC186.08c	-0.77	0.64	0.0192013	0.0482048	I	5548884	5550012
SPAC20G4.03c	hri1	-0.76	6.2	7.86555e-06	0.000124254	I	4818012	4820749
SPNCRNA.996	SPNCRNA.996	-0.76	3.08	5.60586e-05	0.000533409	I	4531144	4532754
SPCC191.01	SPCC191.01	-0.76	6.14	0.000512079	0.0028728	III	1705817	1707734
SPNCRNA.318	SPNCRNA.318	-0.76	-1.91	0.00700743	0.0216063	II	605716	606557
SPNCRNA.377	SPNCRNA.377	-0.76	-2.07	0.0163193	0.0424277	II	1804695	1805092
SPNCRNA.1530	SPNCRNA.1530	-0.75	0.63	0.00112943	0.00518939	II	2580400	2581182
SPAC19G12.10c	cpy1	-0.74	10.91	1.79242e-10	9.82096e-08	I	4061377	4064952
SPAC2F7.11	nrd1	-0.73	6.2	0.00145118	0.00632727	I	555277	559051
SPNCRNA.401	SPNCRNA.401	-0.73	0.65	0.00156356	0.00667995	II	2580438	2581248
SPCC1183.09c	pmp31	-0.72	5.62	7.74514e-06	0.000123903	III	612760	613998
SPAC15A10.10	mde6	-0.71	5.54	7.70734e-09	8.75104e-07	I	3696549	3700027
SPAC22H10.13	zym1	-0.71	5.79	2.49662e-06	5.52702e-05	I	2381690	2382200
SPAC2F3.01	imt1	-0.7	5.99	6.77723e-10	1.65038e-07	I	3922354	3923496
SPBCPT2R1.08c	tlh2	-0.7	3.95	4.37252e-06	8.33314e-05	II	4526885	4532899
SPNCRNA.995	SPNCRNA.995	-0.7	3.71	0.00011298	0.000911461	I	4531036	4532486
SPAC22F8.04	pet1	-0.7	6.68	0.000137992	0.0010445	I	4789418	4791232
SPATRNAILE.02	SPATRNAILE.02	-0.7	-0.81	0.00658767	0.0205377	I	2578426	2578524
SPAC13C5.05c	SPAC13C5.05c	-0.69	5.83	5.01019e-12	6.65546e-09	I	431367	433274
SPCC1884.01	SPCC1884.01	-0.69	4.16	5.76201e-10	1.49922e-07	III	36972	38788
SPNCRNA.1301	grt1-antisense-1	-0.69	3.84	3.53593e-06	7.10971e-05	II	50110	52193
SPBC12C2.03c	SPBC12C2.03c	-0.69	7.48	2.87803e-05	0.000325697	II	2473006	2475652
SPNCRNA.1553	SPNCRNA.1553	-0.69	4.23	0.000162742	0.00118105	II	2826631	2828674
SPAC3G9.11c	SPAC3G9.11c	-0.69	8.69	0.000710762	0.00369071	I	3159753	3162245
SPNCRNA.244	SPNCRNA.244	-0.68	1.27	1.49619e-05	0.000199542	I	4360504	4362103
SPNCRNA.1427	SPNCRNA.1427	-0.68	4.05	0.000117355	0.000928781	II	1297699	1298710
SPBC13A2.04c	ptr2	-0.68	5.85	0.000667631	0.00352584	II	3405575	3408492
SPAPB24D3.07c	SPAPB24D3.07c	-0.67	6.47	9.00026e-08	4.793e-06	I	2957839	2959192
SPNCRNA.1190	SPNCRNA.1190	-0.66	3.2	2.34604e-08	1.85846e-06	III	1371577	1372674
SPBC215.13	SPBC215.13	-0.66	4.52	0.0078573	0.0236222	II	4056051	4058223
SPBC15D4.02	gsf1	-0.66	4.92	0.011116	0.0314439	II	3011491	3015079
SPAC11E3.12	SPAC11E3.12	-0.65	7.27	0.00158131	0.00671647	I	5305696	5308686
SPNCRNA.1122	SPNCRNA.1122	-0.64	0.93	0.000209571	0.00144437	III	258116	258797
SPBC887.15c	sur2	-0.64	6.91	0.000467606	0.00267555	II	3570849	3572677
SPBC215.11c	SPBC215.11c	-0.63	6.58	5.41055e-09	7.56901e-07	II	4050360	4051532
SPAC15A10.09c	pun1	-0.63	5.45	1.22545e-05	0.000172427	I	3694974	3696517
SPAC4C5.03	SPAC4C5.03	-0.63	5.91	2.45216e-05	0.000286886	I	1196723	1198284
SPNCRNA.921	SPNCRNA.921	-0.63	1.84	6.79017e-05	0.000618357	I	3610063	3611779
SPAC4H3.03c	SPAC4H3.03c	-0.63	5.75	0.000660327	0.00349802	I	3826456	3829377
SPNCRNA.446	SPNCRNA.446	-0.63	-0.13	0.014139	0.0378672	II	4452172	4452793
SPCC330.19c	SPCC330.19c	-0.62	2.55	7.59268e-07	2.38689e-05	III	107859	108710
SPNCRNA.1106	SPCC330.19c-antisense-1	-0.62	2.53	7.77478e-07	2.40971e-05	III	107963	108780
SPBC119.05c	lsb1	-0.62	6.3	7.8865e-06	0.000124254	II	721007	722432
SPAC27D7.11c	SPAC27D7.11c	-0.62	7.16	0.00241362	0.00931311	I	4529389	4531031
SPCC757.07c	ctt1	-0.62	6.96	0.00532082	0.0173019	III	56654	58865
SPNCRNA.928	meu16	-0.61	5.26	4.42497e-08	2.96879e-06	I	3697473	3700084
SPNCRNA.846	cig2-antisense-1	-0.59	5.75	4.42464e-06	8.38386e-05	I	2710681	2712634
SPCC548.06c	ght8	-0.59	9.34	0.00317975	0.0115572	III	226336	230546
SPBPB2B2.18	SPBPB2B2.18	-0.59	1.91	0.00388145	0.0134886	II	4502692	4503664
SPCC757.12	SPCC757.12	-0.58	7.03	0.000954008	0.00458189	III	72916	75522
SPNCRNA.1258	SPNCRNA.1258	0.59	2.33	1.75954e-05	0.000223771	III	2084111	2085030
SPAC1687.23c	SPAC1687.23c	0.59	-0.1	0.00155174	0.00664237	I	929156	929654
SPNCRNA.993	SPNCRNA.993	0.59	0.75	0.00655219	0.0204368	I	4515182	4515993
SPNCRNA.1101	SPCC757.13-antisense-1	0.6	5.32	2.11041e-09	4.47612e-07	III	76549	78816
SPNCRNA.675	SPNCRNA.675	0.6	4.23	4.61745e-07	1.68665e-05	I	678571	680480
SPAPB1A11.01	mfc1	0.6	3.45	2.7926e-06	5.991e-05	I	2976370	2979495
SPNCRNA.392	SPNCRNA.392	0.6	-0.24	0.018281	0.0463547	II	2162782	2163089
SPBC725.06c	ppk31	0.61	6.98	5.65118e-12	6.65546e-09	II	1212690	1216671
SPNCRNA.1421	ppk3-antisense-1	0.61	6.99	6.07342e-12	6.65546e-09	II	1212519	1216202
SPBC839.16	thf1	0.61	10.91	3.01032e-10	9.89642e-08	II	627934	631710
SPNCRNA.1180	rec11-antisense-1	0.61	4.17	1.7289e-08	1.53591e-06	III	1224631	1225817
SPAC3G6.05	SPAC3G6.05	0.61	7.76	4.14387e-08	2.8985e-06	I	5387884	5389677
SPNCRNA.1182	SPNCRNA.1182	0.61	3.27	1.60957e-06	4.19497e-05	III	1263755	1264380
SPNCRNA.868	mfc1-antisense-1	0.61	3.01	1.06144e-05	0.000153722	I	2977510	2979357
SPNCRNA.628	SPNCRNA.628	0.61	1.37	8.86721e-05	0.000758153	I	238998	240617
SPNCRNA.664	SPNCRNA.664	0.61	0.43	0.00168677	0.00706701	I	597665	598076
SPNCRNA.988	SPNCRNA.988	0.61	-1.9	0.00864074	0.0255568	I	4442520	4442919
SPNCRNA.324	SPNCRNA.324	0.61	-1.44	0.00990814	0.0285603	II	719163	719617
SPNCRNA.862	SPNCRNA.862	0.62	8.69	4.74218e-08	3.07693e-06	I	2938121	2939967
SPBP22H7.09c	mis15	0.62	4.92	1.24933e-06	3.48067e-05	II	1448815	1450155
SPBC8E4.01c	pho84	0.63	10.65	1.16999e-08	1.18349e-06	II	4444125	4446200
SPAC1002.17c	urg2	0.63	7.24	3.83146e-05	0.000394994	I	1830609	1831951
SPAP27G11.11c	SPAP27G11.11c	0.63	-0.16	0.000317146	0.00197279	I	1630900	1631203
SPNCRNA.307	SPNCRNA.307	0.63	1.03	0.00124949	0.00559634	II	487382	487504
SPBC1271.06c	mug96	0.63	-1.42	0.0107586	0.0306091	II	359903	360366
SPCC757.13	SPCC757.13	0.64	5.02	1.47208e-10	9.68471e-08	III	77080	79816
SPNCRNA.871	SPNCRNA.871	0.64	4.25	5.81055e-10	1.49922e-07	I	2996868	2998123
SPNCRNA.1344	SPBC1271.08c-antisense-1	0.64	6.82	3.42327e-09	5.77129e-07	II	355997	357265
SPAC11D3.03c	SPAC11D3.03c	0.64	3.84	1.3627e-07	6.44587e-06	I	110904	112499
SPBC16D10.08c	hsp104	0.64	8.21	1.8922e-07	8.23921e-06	II	3612265	3615320
SPAC3G9.01	nsk1	0.64	4.88	1.97674e-06	4.74346e-05	I	3181430	3183290
SPBC1348.05	SPBC1348.05	0.64	0.59	0.0113022	0.0318269	II	13572	15378
SPNCRNA.90	SPNCRNA.90	0.65	-0.23	0.00539058	0.0174941	I	5172196	5172341
SPAC11D3.05	mfs2	0.66	4.07	2.48805e-05	0.000289538	I	113950	115962
SPAC212.11	tlh1	0.66	0.9	0.00341869	0.0121765	I	1	5662
SPAC13G7.02c	ssa1	0.67	7.56	3.56785e-07	1.35599e-05	I	2295580	2297981
SPNCRNA.1255	SPNCRNA.1255	0.67	2.9	1.96219e-06	4.74088e-05	III	2022833	2023261
SPNCRNA.782	SPNCRNA.782	0.67	1.59	1.95798e-06	4.74088e-05	I	1955847	1956372
SPNCRNA.1534	SPNCRNA.1534	0.67	2.86	2.40534e-06	5.44654e-05	II	2601158	2601839
SPMITTRNAARG.02	SPMITTRNAARG.02	0.68	2.58	9.23725e-06	0.000138422	MT	17460	17532
SPBPB10D8.02c	SPBPB10D8.02c	0.68	5.17	9.63734e-06	0.000142565	II	83229	85631
SPNCRNA.488	SPNCRNA.488	0.68	2.19	3.69735e-05	0.000385263	III	1337438	1337811
SPBPB2B2.08	SPBPB2B2.08	0.68	3.63	9.23293e-05	0.000779896	II	4475953	4476674
SPNCRNA.1694	SPNCRNA.1694	0.69	3.93	1.06927e-07	5.33567e-06	II	4435887	4436842
SPSNORNA.22	snoR54	0.69	1.94	0.00014108	0.00105649	II	1707601	1707681
SPNCRNA.811	SPNCRNA.811	0.69	3.81	0.000146931	0.00108915	I	2297820	2298939
SPAC869.03c	SPAC869.03c	0.69	1.2	0.00448447	0.0151125	I	5512757	5514865
SPAC31G5.07	dni1	0.7	3.65	1.01148e-08	1.07265e-06	I	2997453	2998157
SPAPB24D3.03	SPAPB24D3.03	0.7	6.72	7.4055e-07	2.36365e-05	I	2952226	2953762
SPNCRNA.425	SPNCRNA.425	0.7	2.94	3.4373e-06	6.95852e-05	II	3605142	3606517
SPNCRNA.774	SPNCRNA.774	0.7	0.84	4.33886e-05	0.000435543	I	1920876	1921644
SPAC212.10	SPAC212.10	0.7	-0.69	0.00061172	0.00329137	I	5726	6331
SPNCRNA.1307	SPBPB10D8.02c-antisense-1	0.71	4.95	8.76234e-06	0.000132747	II	83799	85528
SPCC1223.09	SPCC1223.09	0.71	5.41	4.5396e-05	0.000450194	III	1857150	1858621
SPBCPT2R1.10	SPBCPT2R1.10	0.71	-2.04	0.0136773	0.0369772	II	4526225	4526884
SPNCRNA.68	prl68	0.72	-0.41	0.000784873	0.00395444	II	2204841	2205295
SPNCRNA.877	SPNCRNA.877	0.72	-0.12	0.0017037	0.00712131	I	3032579	3033397
SPNCRNA.727	SPNCRNA.727	0.72	-0.09	0.00930793	0.0271893	I	1234476	1235111
SPNCRNA.863	SPNCRNA.863	0.73	8.95	5.66622e-09	7.60315e-07	I	2939138	2940765
SPBC1683.06c	SPBC1683.06c	0.73	6.01	1.0044e-07	5.19994e-06	II	151789	153659
SPNCRNA.1243	SPNCRNA.1243	0.73	2.4	1.12558e-07	5.482e-06	III	1933436	1935331
SPNCRNA.156	SPNCRNA.156	0.73	0.73	6.0214e-05	0.000565581	I	597723	598290
SPNCRNA.258	SPNCRNA.258	0.73	-0.28	0.00885961	0.0261245	I	5018722	5019072
SPBC460.05	SPBC460.05	0.74	5	1.57439e-05	0.000207447	AB325691	16470	18062
SPNCRNA.400	SPNCRNA.400	0.75	2.07	1.65254e-06	4.25585e-05	II	2528770	2529528
SPNCRNA.1287	SPNCRNA.1287	0.76	5.44	6.37314e-08	3.8073e-06	III	2319056	2320085
SPBPB10D8.01	SPBPB10D8.01	0.76	4.89	1.20953e-05	0.000171394	II	80899	83357
SPNCRNA.504	SPNCRNA.504	0.76	-0.7	0.0065189	0.0203788	III	1839578	1840266
SPBTRNALEU.10	SPBTRNALEU.10	0.78	-1.5	0.011136	0.0314786	II	3914043	3914121
SPAC1A6.08c	mug125	0.8	3.77	5.92846e-10	1.49922e-07	I	1086242	1087505
SPAC186.06	SPAC186.06	0.81	4.51	2.51364e-07	1.02653e-05	I	5542290	5543031
SPBP4G3.02	pho1	0.82	11.44	2.99664e-10	9.89642e-08	II	4446373	4449053
SPAC10F6.15	SPAC10F6.15	0.83	4.03	1.60306e-07	7.12169e-06	I	1235601	1237035
SPAC869.01	SPAC869.01	0.83	2.47	8.24419e-05	0.00071267	I	5521275	5523181
SPBC359.02	alr2	0.84	6.59	1.75198e-08	1.53591e-06	II	107583	109353
SPNCRNA.1309	alr2-antisense-1	0.84	6.56	1.94032e-08	1.63559e-06	II	107514	108774
SPAC22F3.12c	rgs1	0.84	5.01	4.71604e-08	3.07693e-06	I	679062	681890
SPBCPT2R1.04c	SPBCPT2R1.04c	0.84	1.77	5.10892e-06	9.27166e-05	II	4513401	4514815
SPSNRNA.04	snu4	0.85	0.1	0.000307956	0.00193577	II	467233	467361
SPAC186.02c	SPAC186.02c	0.86	0.22	0.00243871	0.00939341	I	5529851	5531144
SPCTRNAPHE.05	SPCTRNAPHE.05	0.88	-1.51	0.0126405	0.0348184	III	1142192	1142264
SPCC70.08c	SPCC70.08c	0.89	5.98	2.57464e-10	9.89642e-08	III	2367804	2368636
SPNCRNA.1292	SPCC70.08c-antisense-1	0.89	6.2	3.65119e-10	1.14317e-07	III	2367506	2368757
SPCC569.01c	SPCC569.01c	0.89	4.83	6.43724e-09	8.1394e-07	III	2434691	2436530
SPNCRNA.512	SPNCRNA.512	0.9	0.38	4.97103e-05	0.000484215	III	2107603	2107915
SPAC1142.09	SPAC1142.09	0.9	-0.79	0.0003542	0.00215083	I	3642498	3642845
SPNCRNA.164	SPNCRNA.164	0.9	-0.82	0.00279217	0.0104488	I	1005499	1005710
SPNCRNA.935	SPNCRNA.935	0.93	7.73	5.20071e-09	7.43362e-07	I	3745778	3748833
SPNCRNA.934	SPNCRNA.934	0.93	7.75	6.03107e-09	7.93086e-07	I	3745764	3748595
SPMITTRNAVAL.01	SPMITTRNAVAL.01	0.96	-1.31	0.000362893	0.002187	MT	17166	17238
SPNCRNA.117	SPNCRNA.117	0.98	-1.12	0.000646036	0.00343942	II	4439928	4440156
SPAC869.04	SPAC869.04	0.98	1.11	0.00994938	0.028654	I	5511137	5512369
SPCPB1C11.03	SPCPB1C11.03	1	7.66	2.90036e-08	2.20488e-06	III	2076393	2079003
SPAC869.06c	SPAC869.06c	1	1.38	3.10648e-05	0.000342129	I	5502560	5503291
SPAC750.06c	SPAC750.06c	1.01	1.97	4.23585e-06	8.16736e-05	I	5568903	5569803
SPNCRNA.480	SPNCRNA.480	1.02	0.56	1.62158e-05	0.000211966	III	1066011	1066485
SPBC1E8.04	Tf2-10	1.05	5.34	1.46861e-07	6.70563e-06	II	1965390	1969387
SPAC977.03	SPAC977.03	1.05	-1.42	0.0031761	0.0115503	I	33835	34272
SPBPB2B2.07c	SPBPB2B2.07c	1.06	-1.1	0.00256128	0.00976693	II	4474145	4474931
SPNCRNA.292	SPNCRNA.292	1.07	0.3	5.98309e-05	0.000563193	II	114092	114583
SPNCRNA.1262	SPNCRNA.1262	1.09	1.28	8.00101e-06	0.000124958	III	2107549	2108268
SPBC359.04c	pfl7	1.11	4.23	1.47296e-10	9.68471e-08	II	117892	121286
SPAC212.09c	SPAC212.09c	1.11	-0.43	0.000942749	0.00453732	I	7619	9274
SPMIT.09	atp8	1.11	3.46	0.0133718	0.0363604	MT	16914	17060
SPAC26A3.13c	Tf2-4	1.12	5.12	2.51303e-09	5.00703e-07	I	3361547	3365548
SPAPB8E5.05	mfm1	1.13	4.23	1.3567e-05	0.000185069	I	4916603	4917521
SPCC70.12c	ecl1	1.14	6.84	2.82223e-10	9.89642e-08	III	2354974	2358570
SPAC9E9.01	SPAC9E9.01	1.16	-0.19	4.66541e-05	0.000460586	I	4434861	4435509
SPBCPT2R1.07c	SPBCPT2R1.07c	1.21	0.06	1.00075e-05	0.000146437	II	4523274	4524970
SPAC167.08	Tf2-2	1.24	5.59	1.26225e-08	1.24507e-06	I	1564101	1568523
SPAC2E1P3.03c	Tf2-3	1.24	2.52	0.00277193	0.0103908	I	2927204	2931205
SPNCRNA.360	SPNCRNA.360	1.24	-2.64	0.00411084	0.0140995	II	1606372	1609066
SPNCRNA.286	SPNCRNA.286	1.25	-0.85	3.14231e-05	0.00034492	I	2474084	2474170
SPNCRNA.681	SPNCRNA.681	1.3	-2.82	0.0154716	0.0406417	I	776184	777243
SPNCRNA.293	SPNCRNA.293	1.32	2.35	1.57238e-08	1.42149e-06	II	120577	121643
SPNCRNA.70	SPNCRNA.70	1.35	-0.8	1.54682e-05	0.000204224	I	11027	11556
SPAC4H3.12c	SPAC4H3.12c	1.38	-1.8	0.000428343	0.00250343	I	3851646	3852219
SPCC1020.14	Tf2-12	1.42	2.05	0.00240744	0.00931196	III	778133	782134
SPATRNALYS.01	SPATRNALYS.01	1.48	-2.3	0.000950606	0.00456889	I	1704582	1704664
SPNCRNA.283	SPNCRNA.283	1.59	-1.76	0.000103218	0.000846416	I	5524889	5525299
SPAC27E2.08	Tf2-6	1.77	1.97	0.0031433	0.0114946	I	4022492	4026493
SPAC13D1.01c	Tf2-7	1.83	2.33	0.00181906	0.00750335	I	5191060	5195702
SPAC9.04	Tf2-1	1.88	1.91	0.00413966	0.0141796	I	1465785	1469848
SPBC9B6.02c	Tf2-9	1.96	1.7	0.00391634	0.0135757	II	1812748	1816780
SPBC3E7.02c	hsp16	2.08	6.71	7.3259e-14	4.12113e-10	II	2660139	2660992
SPAPB15E9.03c	Tf2-5	2.18	1.44	0.010607	0.0302828	I	3996423	4000424
SPNCRNA.1299	SPNCRNA.1299	2.91	0.06	0.00549531	0.0177989	III	2448764	2449506
SPCC1494.11c	Tf2-13	6.22	2.55	1.24307e-12	2.7244e-09	III	2320320	2324320
FDR 05_ FC1.5

## Sheet: single copy G34R vs WT_genelist
geneID	Gene.name	log2FC	log2AveExpr	P.Value	FDR	chr	start	end
SPBTRNAASN.02	SPBTRNAASN.02	-2.01	-3.39	0.00235206	0.0100225	II	2032160	2032233
SPNCRNA.61	prl61	-1.63	1.48	5.68615e-08	5.22724e-06	I	5546205	5546648
SPAC186.07c	SPAC186.07c	-1.58	2.18	4.24867e-09	1.10546e-06	I	5545615	5546613
SPBPB2B2.17c	SPBPB2B2.17c	-1.54	0.6	3.92226e-06	8.8318e-05	II	4501956	4502396
SPBPB21E7.04c	SPBPB21E7.04c	-1.53	6.47	8.26476e-10	3.3963e-07	II	64487	65620
SPNCRNA.1304	SPNCRNA.1304	-1.53	4.71	3.69118e-09	1.01123e-06	II	65390	66274
SPBPB2B2.18	SPBPB2B2.18	-1.48	1.91	2.0954e-06	5.78877e-05	II	4502692	4503664
SPCP20C8.03	SPCP20C8.03	-1.44	2.54	1.05942e-11	1.74142e-08	III	32624	33393
SPAC869.02c	SPAC869.02c	-1.42	6.9	5.89356e-10	2.58335e-07	I	5517865	5519950
SPAC977.18	SPAC977.18	-1.37	2.14	3.35804e-05	0.000412693	I	31140	32345
SPAC977.02	SPAC977.02	-1.36	1.92	5.41722e-05	0.000591111	I	32034	33012
SPCP20C8.04	new22	-1.27	-2.28	0.010806	0.0324871	III	36421	36657
SPBPB8B6.04c	grt1	-1.26	4.9	1.53431e-09	4.77332e-07	II	47369	51220
SPBPB8B6.03	fah1	-1.26	3.55	6.98821e-08	6.04572e-06	II	47056	49071
SPNCRNA.318	SPNCRNA.318	-1.24	-1.91	0.000205163	0.00157729	II	605716	606557
SPBPB21E7.06	SPBPB21E7.06	-1.16	-0.45	0.00194616	0.00862623	II	68355	68852
SPNCRNA.1301	grt1-antisense-1	-1.13	3.84	1.34545e-08	2.2683e-06	II	50110	52193
SPCC737.04	SPCC737.04	-1.1	5.08	1.04715e-08	1.81185e-06	III	1891328	1893817
SPAC186.03	SPAC186.03	-1.1	1.14	0.000136046	0.00116334	I	5535061	5536432
SPAC5H10.10	SPAC5H10.10	-1.08	6.82	4.11164e-11	2.7034e-08	I	162756	164635
SPNCRNA.615	SPAC5H10.10-antisense-1	-1.06	6.89	3.94963e-11	2.7034e-08	I	162257	164455
SPBC83.19c	SPBC83.19c	-1.03	-1.85	0.000318777	0.00219472	II	1541452	1541903
SPBC1348.11	SPBC1348.11	-0.98	-0.58	0.00731794	0.0239738	II	33231	34780
SPNCRNA.376	SPNCRNA.376	-0.94	1.17	3.18325e-07	1.60999e-05	II	1721073	1721574
SPAC869.07c	mel1	-0.94	2.83	3.3895e-06	8.00851e-05	I	5499768	5501236
SPAC26H5.08c	bgl2	-0.92	6	8.11656e-05	0.000787115	I	4134378	4136031
SPBCPT2R1.04c	SPBCPT2R1.04c	-0.9	1.77	2.01067e-05	0.000290553	II	4513401	4514815
SPBPB2B2.12c	gal10	-0.88	4.92	7.0745e-07	2.87129e-05	II	4484023	4487569
SPNCRNA.248	SPNCRNA.248	-0.88	-1.87	0.0103547	0.0314033	I	4531070	4531631
SPCP20C8.02c	SPCP20C8.02c	-0.85	3.27	1.02962e-08	1.81185e-06	III	30561	31740
SPBPB2B2.11	SPBPB2B2.11	-0.84	4.92	3.96695e-07	1.82397e-05	II	4483683	4487313
SPNCRNA.1122	SPNCRNA.1122	-0.83	0.93	1.34851e-05	0.000214409	III	258116	258797
SPNCRNA.81	SPNCRNA.81	-0.82	-2.31	0.00680588	0.0227061	I	1574846	1575103
SPNCRNA.601	SPNCRNA.601	-0.8	1.28	0.000504198	0.00319991	I	40916	41770
SPNCRNA.136	SPNCRNA.136	-0.8	1.27	0.000532583	0.00332701	I	40795	41489
SPBC359.02	alr2	-0.79	6.59	1.0055e-07	7.68739e-06	II	107583	109353
SPNCRNA.1309	alr2-antisense-1	-0.79	6.56	1.23359e-07	8.81616e-06	II	107514	108774
SPAC18B11.04	ncs1	-0.78	6.04	7.13737e-09	1.51381e-06	I	310157	311712
SPAC869.06c	SPAC869.06c	-0.77	1.38	0.00182619	0.00821889	I	5502560	5503291
SPNCRNA.287	SPNCRNA.287	-0.77	0.6	0.00220292	0.0094606	II	21060	21754
SPBPB21E7.07	aes1	-0.76	7.72	5.45977e-08	5.15026e-06	II	70156	71310
SPAC186.01	pfl9	-0.76	2.47	0.000138355	0.00117682	I	5527462	5528959
SPCC1884.01	SPCC1884.01	-0.75	4.16	1.25105e-10	6.85473e-08	III	36972	38788
SPNCRNA.310	SPNCRNA.310	-0.75	-0.4	0.00369697	0.0142271	I	5543364	5543438
SPNCRNA.869	SPNCRNA.869	-0.73	0.61	5.54483e-06	0.000113574	I	2979599	2980606
SPBC530.07c	SPBC530.07c	-0.72	8.07	8.10871e-06	0.000151033	II	804139	805686
SPNCRNA.1096	SPCC1884.01-antisense-1	-0.71	5.25	4.37139e-09	1.10546e-06	III	37658	39319
SPBC460.01c	SPBC460.01c	-0.71	5.4	6.10277e-08	5.49667e-06	AB325691	1479	3197
SPAC186.09	SPAC186.09	-0.71	2.09	2.52941e-05	0.000347926	I	5552811	5554529
SPNCRNA.1093	SPAC869.09-antisense-1	-0.71	2.51	0.000879905	0.00474211	I	5496942	5497837
SPAC8E11.10	SPAC8E11.10	-0.7	7.75	9.79823e-11	5.85667e-08	I	3372749	3375005
SPCC1235.13	ght6	-0.7	4.73	5.14901e-08	5.07263e-06	III	204706	206717
SPNCRNA.1118	ght6-antisense-1	-0.7	4.73	5.72412e-08	5.22724e-06	III	204633	206912
SPBC19C7.04c	SPBC19C7.04c	-0.7	6.82	0.000481315	0.00309652	II	2825251	2826700
SPAC869.09	SPAC869.09	-0.7	2.39	0.00164782	0.00762448	I	5496844	5497448
SPNCRNA.175	SPNCRNA.175	-0.7	-1.18	0.00205762	0.00897734	I	1573772	1574466
SPBC1348.07	SPBC1348.07	-0.7	0.36	0.00924048	0.0285643	II	19395	20606
SPNCRNA.1223	SPCC191.10-antisense-1	-0.68	0.64	0.0103637	0.0314161	III	1721177	1722876
SPAC13C5.05c	SPAC13C5.05c	-0.67	5.83	5.26323e-12	1.55792e-08	I	431367	433274
SPAPB1A11.02	SPAPB1A11.02	-0.67	1.68	1.99674e-05	0.000289814	I	2980428	2981839
SPNCRNA.1553	SPNCRNA.1553	-0.67	4.23	0.000151222	0.0012491	II	2826631	2828674
SPBC19C2.04c	ubp11	-0.67	5.05	0.00166556	0.00768497	II	1676352	1678652
SPNCRNA.276	SPNCRNA.276	-0.67	-0.67	0.0172046	0.0468018	I	5474747	5475378
SPBC1289.14	SPBC1289.14	-0.66	4.74	5.05509e-08	5.07263e-06	II	4412072	4413599
SPAC869.08	pcm2	-0.66	2.51	0.000172664	0.00137275	I	5497918	5499280
SPBC1348.14c	ght7	-0.66	0.33	0.0141782	0.0402686	II	38514	40277
SPNCRNA.291	SPNCRNA.291	-0.65	3.44	1.77706e-07	1.08032e-05	II	103165	104528
SPCC1235.12c	mug146	-0.65	2.15	2.5906e-06	6.67969e-05	III	201551	202707
SPAC57A10.06	mug15	-0.65	2.35	4.79559e-06	0.000102042	I	1376587	1377072
SPCC191.10	SPCC191.10	-0.65	0.01	0.0169976	0.046431	III	1721489	1722397
SPNCRNA.1602	hop1-antisense-1	-0.64	4.72	1.09968e-09	4.09927e-07	II	3472409	3474227
SPBC1718.02	hop1	-0.64	4.72	1.66975e-09	4.77332e-07	II	3472319	3474169
SPBC2F12.11c	rep2	-0.64	5.66	1.24645e-06	4.07733e-05	II	1717715	1719322
SPNCRNA.1157	SPNCRNA.1157	-0.64	2.96	1.90241e-06	5.46217e-05	III	763667	765622
SPAPB1A10.14	pof15	-0.64	5.62	0.000482423	0.00309759	I	1890529	1892090
SPAC4H3.01	SPAC4H3.01	-0.63	6.74	7.10836e-12	1.55792e-08	I	3821682	3824461
SPAC977.01	SPAC977.01	-0.62	2	0.000104069	0.000965096	I	29764	31069
SPBPB2B2.14c	SPBPB2B2.14c	-0.62	0.68	0.000733846	0.00414178	II	4492580	4493364
SPAC2F7.11	nrd1	-0.62	6.2	0.00425205	0.0158938	I	555277	559051
SPAC19G12.05	SPAC19G12.05	-0.61	5.96	1.5806e-11	2.07849e-08	I	4050905	4052174
SPNCRNA.921	SPNCRNA.921	-0.6	1.84	6.66687e-05	0.000683848	I	3610063	3611779
SPNCRNA.1087	gto1-antisense-1	-0.59	4.12	0.000107835	0.000986117	I	5472729	5475847
SPNCRNA.871	SPNCRNA.871	0.59	4.25	1.3266e-09	4.3612e-07	I	2996868	2998123
SPNCRNA.774	SPNCRNA.774	0.59	0.84	0.000186481	0.00146489	I	1920876	1921644
SPAC15F9.01c	SPAC15F9.01c	0.59	1.01	0.00063048	0.00371635	I	2397248	2398350
SPBC365.12c	ish1	0.59	7.51	0.00110033	0.00559959	II	2516125	2518792
SPCTRNAASN.05	SPCTRNAASN.05	0.59	-1.08	0.00640521	0.0216303	III	947262	947335
SPAC458.04c	dli1	0.6	3.29	2.56637e-07	1.41797e-05	I	4737481	4738962
SPNCRNA.1182	SPNCRNA.1182	0.6	3.27	1.21708e-06	4.00369e-05	III	1263755	1264380
SPSNORNA.14	snoR54b	0.6	1.89	0.000603609	0.00359812	I	4238306	4238401
SPNCRNA.649	lsd2-antisense-1	0.6	0.34	0.000635697	0.00372424	I	446175	446702
SPAC9E9.01	SPAC9E9.01	0.6	-0.19	0.0111284	0.0331833	I	4434861	4435509
SPAC22H10.13	zym1	0.62	5.79	4.56748e-06	9.84628e-05	I	2381690	2382200
SPBP4G3.02	pho1	0.63	11.44	9.37822e-09	1.71283e-06	II	4446373	4449053
SPAC212.08c	SPAC212.08c	0.63	2.3	1.63711e-05	0.000248019	I	11784	12994
SPNCRNA.21	prl21	0.63	-0.29	0.0141388	0.0401739	I	5454229	5454498
SPNCRNA.406	SPNCRNA.406	0.64	0.39	0.00059213	0.00355548	II	2738941	2739592
SPBC947.04	pfl3	0.65	6.45	4.47902e-10	2.10354e-07	II	669581	673842
SPNCRNA.1672	SPNCRNA.1672	0.65	1.73	2.01239e-06	5.65384e-05	II	4128866	4129750
SPNCRNA.857	SPACUNK4.17-antisense-1	0.65	7.14	0.000591837	0.00355548	I	2872137	2874308
SPNCRNA.37	prl37	0.65	-1.05	0.0186601	0.0498278	I	71982	72380
SPAC31G5.07	dni1	0.66	3.65	1.52424e-08	2.39037e-06	I	2997453	2998157
SPBC4.01	dni2	0.66	1.98	9.02866e-06	0.000163987	II	1184427	1185324
SPBC1E8.04	Tf2-10	0.66	5.34	3.28843e-05	0.000407815	II	1965390	1969387
SPCC569.01c	SPCC569.01c	0.68	4.83	1.79755e-07	1.08032e-05	III	2434691	2436530
SPAC167.08	Tf2-2	0.69	5.59	1.40903e-05	0.000221107	I	1564101	1568523
SPACUNK4.17	SPACUNK4.17	0.69	7.01	0.000733867	0.00414178	I	2872778	2874687
SPNCRNA.299	SPNCRNA.299	0.69	-0.32	0.000791163	0.00437134	II	274745	275832
SPNCRNA.231	SPNCRNA.231	0.69	-0.49	0.00281678	0.0114819	I	3761023	3762114
SPNCRNA.04	prl4	0.69	-0.69	0.0122075	0.0357049	II	3295176	3295428
SPNCRNA.164	SPNCRNA.164	0.69	-0.82	0.0141949	0.0402986	I	1005499	1005710
SPAC26A3.13c	Tf2-4	0.71	5.12	7.44196e-07	2.95786e-05	I	3361547	3365548
SPNCRNA.781	SPNCRNA.781	0.72	4.64	1.13174e-09	4.09927e-07	I	1954820	1956332
SPBC56F2.15	tam13	0.72	5.99	1.22606e-07	8.81616e-06	II	4103472	4103759
SPAC22F3.12c	rgs1	0.74	5.01	2.06491e-07	1.20149e-05	I	679062	681890
SPAC19A8.16	prl65	0.74	3.52	2.45598e-07	1.38583e-05	I	2472433	2472961
SPNCRNA.782	SPNCRNA.782	0.75	1.59	3.4517e-07	1.66875e-05	I	1955847	1956372
SPBC16E9.16c	lsd90	0.77	7.1	0.000226073	0.00170267	II	1947985	1950255
SPBC1271.06c	mug96	0.78	-1.42	0.00204149	0.00892471	II	359903	360366
SPNCRNA.504	SPNCRNA.504	0.78	-0.7	0.00492633	0.0176998	III	1839578	1840266
SPNCRNA.1379	SPNCRNA.1379	0.79	3.39	1.18458e-09	4.09927e-07	II	672533	673656
SPNCRNA.1107	SPNCRNA.1107	0.79	-0.03	0.00010129	0.0009514	III	108832	109337
SPAC212.07c	SPAC212.07c	0.8	2.07	4.63492e-06	9.95902e-05	I	13665	14555
SPAC11D3.01c	SPAC11D3.01c	0.81	5.97	1.88522e-06	5.43654e-05	I	108732	109195
SPNCRNA.189	SPNCRNA.189	0.81	-0.99	0.000134605	0.0011569	I	2248603	2249009
SPNCRNA.286	SPNCRNA.286	0.81	-0.85	0.0016342	0.00757779	I	2474084	2474170
SPCTRNALYS.12	SPCTRNALYS.12	0.81	-1.72	0.00543664	0.0191002	III	1475034	1475116
SPBTRNALEU.09	SPBTRNALEU.09	0.81	-2.11	0.00816725	0.0259293	II	3209139	3209217
SPAC1A6.08c	mug125	0.82	3.77	2.88135e-10	1.4573e-07	I	1086242	1087505
SPNCRNA.215	SPNCRNA.215	0.82	0.8	2.89834e-06	7.21839e-05	I	3086472	3086930
SPAC212.12	SPAC212.12	0.82	3.99	6.13628e-05	0.000645536	I	15855	16226
SPAC23H3.15c	SPAC23H3.15c	0.83	7.42	1.20878e-05	0.000199691	I	2523372	2524734
SPNCRNA.779	SPNCRNA.779	0.84	2.83	2.51405e-08	3.59511e-06	I	1953735	1954811
SPNCRNA.832	SPAC23H3.15c-antisense-1	0.84	7.39	1.05091e-05	0.000181358	I	2523434	2525232
SPBTRNAASN.04	SPBTRNAASN.04	0.85	-1.78	0.0140187	0.0399535	II	4210053	4210126
SPAC1002.17c	urg2	0.86	7.24	1.50036e-06	4.62155e-05	I	1830609	1831951
SPATRNASER.02	SPATRNASER.02	0.87	-2.2	0.0161649	0.0446823	I	3047677	3047758
SPBTRNALYS.09	SPBTRNALYS.09	0.88	-1.62	0.00262931	0.0109105	II	3814134	3814216
SPATRNAARG.03	SPATRNAARG.03	0.88	-0.66	0.00342094	0.0133409	I	5045132	5045204
SPAC4H3.08	SPAC4H3.08	0.91	3.98	3.45334e-11	2.7034e-08	I	3841498	3843136
SPBTRNATYR.04	SPBTRNATYR.04	0.91	-1.83	0.00274769	0.0112491	II	3814558	3814641
SPNCRNA.444	SPNCRNA.444	0.92	-2.44	0.00900687	0.0279472	II	4435937	4436680
SPAC1002.19	urg1	0.97	7.92	1.20232e-07	8.78358e-06	I	1835270	1837060
SPATRNAVAL.04	SPATRNAVAL.04	0.97	-2.24	0.00611156	0.0208963	I	3710739	3710821
SPATRNAPHE.02	SPATRNAPHE.02	0.98	-2.43	0.0123182	0.0359647	I	3752334	3752406
SPNCRNA.780	SPNCRNA.780	1	1.66	3.11308e-07	1.60999e-05	I	1953760	1954186
SPNCRNA.512	SPNCRNA.512	1	0.38	1.13288e-05	0.000191483	III	2107603	2107915
SPNCRNA.480	SPNCRNA.480	1	0.56	1.55687e-05	0.000238056	III	1066011	1066485
SPCTRNAPHE.05	SPCTRNAPHE.05	1	-1.51	0.00483665	0.0174652	III	1142192	1142264
SPAC212.04c	SPAC212.04c	1.03	4	3.23297e-06	7.78636e-05	I	21381	23050
SPAPB8E5.05	mfm1	1.06	4.23	2.41745e-05	0.000336041	I	4916603	4917521
SPATRNAPRO.02	SPATRNAPRO.02	1.06	0.28	0.000403158	0.00266408	I	1314924	1315020
SPNCRNA.1262	SPNCRNA.1262	1.09	1.28	5.95435e-06	0.000119724	III	2107549	2108268
SPAC212.09c	SPAC212.09c	1.15	-0.43	0.000540674	0.00336762	I	7619	9274
SPBTRNALEU.10	SPBTRNALEU.10	1.4	-1.5	7.03537e-05	0.000710562	II	3914043	3914121
SPATRNALYS.01	SPATRNALYS.01	1.46	-2.3	0.000940283	0.00498176	I	1704582	1704664
SPNCRNA.360	SPNCRNA.360	1.59	-2.64	0.000414127	0.00272187	II	1606372	1609066
SPATRNAMET.01	SPATRNAMET.01	1.72	-2.6	0.00014278	0.0012051	I	1096474	1096545
SPBC3E7.02c	hsp16	2.02	6.71	1.20825e-13	7.94421e-10	II	2660139	2660992
SPNCRNA.1299	SPNCRNA.1299	3.01	0.06	0.00386852	0.0147196	III	2448764	2449506
FDR 05_ FC1.5

## Sheet: single copy set2D vs wt_genelis
geneID	Gene.name	log2FC	log2AveExpr	P.Value	FDR	chr	start	end
SPAC29B12.02c	set2	-3.57	6.39	4.44096e-19	2.91993e-15	I	5408180	5411132
SPNCRNA.188	SPNCRNA.188	-2.11	-0.52	9.81592e-07	9.92189e-06	I	2228049	2228781
SPCC1183.12	spo13	-2.02	1.53	6.86183e-09	1.8614e-07	III	604366	604961
SPNCRNA.869	SPNCRNA.869	-2	0.61	6.20558e-10	2.77563e-08	I	2979599	2980606
SPNCRNA.524	SPNCRNA.524	-1.98	-3.13	2.2959e-05	0.00012664	I	3735863	3735954
SPAPB1A11.02	SPAPB1A11.02	-1.91	1.68	2.52397e-09	8.13485e-08	I	2980428	2981839
SPCC191.10	SPCC191.10	-1.87	0.01	2.14726e-05	0.000119646	III	1721489	1722397
SPNCRNA.1672	SPNCRNA.1672	-1.7	1.73	2.10131e-09	7.01326e-08	II	4128866	4129750
SPBC646.06c	agn2	-1.69	4.89	5.82408e-13	9.57333e-11	II	932654	934311
SPNCRNA.346	SPNCRNA.346	-1.62	-1.85	0.000168856	0.000658499	II	1312125	1313175
SPCC1235.12c	mug146	-1.56	2.15	9.51877e-10	3.86333e-08	III	201551	202707
SPNCRNA.1223	SPCC191.10-antisense-1	-1.55	0.64	6.90226e-05	0.000312766	III	1721177	1722876
SPBC1289.14	SPBC1289.14	-1.47	4.74	1.01837e-11	9.43068e-10	II	4412072	4413599
SPNCRNA.222	SPNCRNA.222	-1.45	-1.12	6.56068e-05	0.000299143	I	3497897	3498505
SPAC4G9.22	SPAC4G9.22	-1.4	7.17	5.17563e-07	6.04436e-06	I	2291666	2292778
SPBC1289.17	Tf2-11	-1.39	8.08	1.3756e-13	3.34984e-11	II	4414657	4418658
SPNCRNA.473	SPNCRNA.473	-1.39	0.37	1.18438e-05	7.40941e-05	III	756719	757024
SPAC5D6.10c	mug116	-1.35	-1.18	0.0201075	0.0379469	I	1494670	1495830
SPNCRNA.417	SPNCRNA.417	-1.35	1.42	7.49254e-08	1.3102e-06	II	3241812	3242520
SPBC19C7.04c	SPBC19C7.04c	-1.35	6.82	7.6041e-07	8.12959e-06	II	2825251	2826700
SPNCRNA.385	SPNCRNA.385	-1.34	-2.58	0.019043	0.0363237	II	2022111	2022686
SPNCRNA.1530	SPNCRNA.1530	-1.3	0.63	1.41612e-05	8.48769e-05	II	2580400	2581182
SPNCRNA.401	SPNCRNA.401	-1.29	0.65	1.85417e-05	0.000105187	II	2580438	2581248
SPNCRNA.394	SPNCRNA.394	-1.29	-0.42	5.07704e-05	0.000241371	II	2198477	2199461
SPNCRNA.1157	SPNCRNA.1157	-1.25	2.96	4.71848e-09	1.3607e-07	III	763667	765622
SPNCRNA.855	SPNCRNA.855	-1.24	0.64	3.17664e-06	2.5659e-05	I	2829719	2830254
SPBC83.19c	SPBC83.19c	-1.19	-1.85	0.000140203	0.000563124	II	1541452	1541903
SPCC737.04	SPCC737.04	-1.19	5.08	7.5118e-09	1.9996e-07	III	1891328	1893817
SPAC26H5.08c	bgl2	-1.17	6	1.05816e-05	6.76791e-05	I	4134378	4136031
SPNCRNA.122	SPNCRNA.122	-1.16	-2.55	0.00598138	0.0135053	III	1291525	1291986
SPCPJ732.03	meu15	-1.15	0.22	1.8796e-06	1.69127e-05	III	708064	709145
SPNCRNA.249	SPNCRNA.249	-1.14	0.49	1.6656e-05	9.702e-05	I	4565700	4566208
SPNCRNA.1106	SPCC330.19c-antisense-1	-1.14	2.53	1.57483e-09	5.65822e-08	III	107963	108780
SPNCRNA.879	SPNCRNA.879	-1.13	1.02	7.91069e-06	5.32373e-05	I	3051825	3053237
SPCC330.19c	SPCC330.19c	-1.13	2.55	1.72555e-09	5.97133e-08	III	107859	108710
SPNCRNA.348	SPNCRNA.348	-1.12	-0.11	1.88853e-06	1.69633e-05	II	1427986	1428304
SPNCRNA.1255	SPNCRNA.1255	-1.1	2.9	1.49977e-07	2.28263e-06	III	2022833	2023261
SPNCRNA.912	SPNCRNA.912	-1.09	-1.78	0.000333154	0.0011633	I	3498330	3498616
SPNCRNA.397	SPNCRNA.397	-1.09	1.63	3.94986e-05	0.000196745	II	2472439	2472537
SPAC56F8.15	SPAC56F8.15	-1.04	2.87	0.000794593	0.00242321	I	1151431	1153638
SPNCRNA.1190	SPNCRNA.1190	-1.04	3.2	1.83012e-10	9.86316e-09	III	1371577	1372674
SPAC2F7.11	nrd1	-1.03	6.2	9.48747e-05	0.000404016	I	555277	559051
SPNCRNA.1485	SPNCRNA.1485	-1.03	3.6	5.75091e-09	1.60903e-07	II	2091791	2092358
SPBC18E5.15	SPBC18E5.15	-1.03	3.55	1.94436e-08	4.46999e-07	II	2091892	2092234
SPNCRNA.1553	SPNCRNA.1553	-1.03	4.23	4.62412e-06	3.46677e-05	II	2826631	2828674
SPNCRNA.1423	SPNCRNA.1423	-1.03	-2.62	0.00300171	0.00753291	II	1264114	1264873
SPAPJ691.02	SPAPJ691.02	-1.02	3.8	6.74008e-07	7.34926e-06	I	5187647	5189187
SPBC713.12	erg1	-1	6.56	6.65646e-07	7.28223e-06	II	892162	894361
SPAPB1A11.03	SPAPB1A11.03	-0.99	4.86	1.25272e-10	7.4204e-09	I	2984439	2986118
SPNCRNA.205	SPNCRNA.205	-0.99	-0.49	0.00466777	0.0109609	I	2738681	2740459
SPNCRNA.208	SPNCRNA.208	-0.97	-2.3	0.00881522	0.0188549	I	2802514	2802681
SPCC1450.08c	wtf16	-0.97	1.72	1.77405e-05	0.000101872	III	1739338	1740925
SPCC548.02c	wtf3	-0.97	-0.46	0.000109176	0.000456348	III	219185	220283
SPAC22H10.13	zym1	-0.95	5.79	1.22729e-07	1.93048e-06	I	2381690	2382200
SPAC1687.16c	erg31	-0.94	5.34	2.02445e-05	0.000113767	I	932425	934021
SPNCRNA.263	SPNCRNA.263	-0.93	-0.37	5.33809e-05	0.000250164	I	5317424	5317575
SPNCRNA.1460	SPNCRNA.1460	-0.93	1.21	3.04458e-06	2.49602e-05	II	1749626	1751043
SPAC26H5.09c	SPAC26H5.09c	-0.92	6.82	3.13287e-07	4.15294e-06	I	4137266	4139080
SPNCRNA.1666	SPNCRNA.1666	-0.92	2.48	6.91853e-08	1.23021e-06	II	4088146	4088647
SPNCRNA.124	SPNCRNA.124	-0.91	-0.13	0.00196281	0.00521011	I	3558766	3559116
SPNCRNA.1540	SPNCRNA.1540	-0.9	0.38	1.28292e-05	7.89815e-05	II	2659605	2660100
SPNCRNA.1218	SPNCRNA.1218	-0.88	0.9	3.00923e-05	0.000157973	III	1704099	1705906
SPNCRNA.1166	SPNCRNA.1166	-0.88	-2.06	0.0114213	0.0235186	III	968081	968556
SPNCRNA.399	SPNCRNA.399	-0.87	1.86	3.4895e-05	0.000177718	II	2527461	2528721
SPNCRNA.1482	SPNCRNA.1482	-0.87	5.19	7.92393e-05	0.000348961	II	2021269	2022034
SPBC16E9.17c	rem1	-0.87	2.75	0.000829036	0.0025189	II	1953419	1954793
SPNCRNA.1120	SPNCRNA.1120	-0.87	1.15	0.0116414	0.0238782	III	230600	231934
SPAC2E1P3.05c	SPAC2E1P3.05c	-0.86	6.43	7.50337e-07	8.03496e-06	I	2935116	2937079
SPAC27D7.09c	SPAC27D7.09c	-0.85	2.27	7.17601e-06	4.9097e-05	I	4523298	4524731
SPNCRNA.740	SPNCRNA.740	-0.84	1.93	3.51459e-06	2.77746e-05	I	1398982	1399560
SPBC1E8.05	SPBC1E8.05	-0.84	8.19	0.000469413	0.00155063	II	1970612	1972799
SPNCRNA.1528	tri1-antisense-1	-0.83	4.06	4.25611e-07	5.23064e-06	II	2555739	2556917
SPNCRNA.115	SPNCRNA.115	-0.83	-2.72	0.0173778	0.0336452	II	3379891	3379982
SPAC11E3.13c	gas5	-0.81	7.06	0.00126423	0.00361876	I	5306742	5309063
SPNCRNA.940	SPNCRNA.940	-0.8	-0.98	0.00170931	0.00465178	I	3840750	3841441
SPAC22F8.02c	pvg5	-0.8	4.8	0.00392055	0.0094562	I	4785162	4786280
SPBC2F12.11c	rep2	-0.8	5.66	1.59546e-07	2.41153e-06	II	1717715	1719322
SPAC4H3.08	SPAC4H3.08	-0.79	3.98	4.69875e-09	1.3607e-07	I	3841498	3843136
SPNCRNA.174	SPNCRNA.174	-0.79	-1.53	0.00297934	0.00748821	I	1526345	1527075
SPNCRNA.1527	SPNCRNA.1527	-0.79	-0.04	0.000153309	0.000610544	II	2552926	2553784
SPBC215.13	SPBC215.13	-0.79	4.52	0.00275973	0.00700859	II	4056051	4058223
SPAC1B3.06c	SPAC1B3.06c	-0.77	7.95	2.7853e-12	3.45535e-10	I	4937755	4939182
SPNCRNA.322	SPNCRNA.322	-0.77	2.28	2.87592e-05	0.000152125	II	674049	676227
SPNCRNA.364	SPNCRNA.364	-0.77	-1.66	0.0213305	0.0398772	II	1613277	1614347
SPAC26A3.13c	Tf2-4	-0.76	5.12	3.32212e-06	2.65084e-05	I	3361547	3365548
SPBC32H8.02c	nep2	-0.76	4.6	0.0199497	0.0377031	II	1451331	1454730
SPNCRNA.1559	SPNCRNA.1559	-0.75	-0.34	0.00123781	0.00355707	II	2885636	2886536
SPCC306.11	SPCC306.11	-0.75	6.74	0.0133922	0.0269278	III	430385	432270
SPAC19E9.03	pas1	-0.74	8.45	4.97358e-05	0.000237654	I	1361066	1364174
SPAC637.03	SPAC637.03	-0.74	5.76	0.000235457	0.000869737	I	4542091	4543533
SPNCRNA.253	SPNCRNA.253	-0.74	2.14	0.00927656	0.0197134	I	4787154	4787928
SPBC30B4.01c	wsc1	-0.74	5.83	0.000535034	0.00173208	II	1297676	1301328
SPNCRNA.1164	SPNCRNA.1164	-0.74	3.24	7.79437e-05	0.000344408	III	966133	971255
SPCC16C4.07	scw1	-0.74	5.98	0.00271438	0.00690748	III	673476	675251
SPAC18B11.04	ncs1	-0.73	6.04	1.96557e-08	4.503e-07	I	310157	311712
SPNCRNA.900	SPNCRNA.900	-0.73	3.84	6.84067e-06	4.72451e-05	I	3300812	3302082
SPAC167.08	Tf2-2	-0.73	5.59	4.30046e-05	0.00021127	I	1564101	1568523
SPBC119.05c	lsb1	-0.73	6.3	1.2611e-06	1.22478e-05	II	721007	722432
SPNCRNA.1128	SPNCRNA.1128	-0.73	2.75	3.21974e-06	2.59434e-05	III	299136	299950
SPNCRNA.1209	SPCC13B11.03c-antisense-1	-0.71	1.76	3.59455e-06	2.80909e-05	III	1594598	1595339
SPNCRNA.618	gpi7-antisense-1	-0.7	5.93	1.63661e-09	5.79722e-08	I	176878	177943
SPAC24C9.08	SPAC24C9.08	-0.7	8.37	4.22984e-09	1.25276e-07	I	3061210	3063526
SPAC11E3.12	SPAC11E3.12	-0.7	7.27	0.000866844	0.00261086	I	5305696	5308686
SPNCRNA.1123	SPNCRNA.1123	-0.7	1.57	7.19966e-06	4.92076e-05	III	264766	265275
SPAC30.04c	abc4	-0.69	7.72	4.3183e-09	1.27322e-07	I	4395798	4400493
SPATRNAALA.06	SPATRNAALA.06	-0.69	-2.61	0.0248684	0.045281	I	4796977	4797059
SPCC364.07	ser3	-0.69	10.93	3.91778e-09	1.18162e-07	III	470073	472362
SPNCRNA.1205	SPNCRNA.1205	-0.69	-0.51	0.000802308	0.00244463	III	1559743	1561240
SPNCRNA.846	cig2-antisense-1	-0.68	5.75	9.74487e-07	9.88773e-06	I	2710681	2712634
SPAC1786.04	SPAC1786.04	-0.68	2.37	0.000438817	0.00145792	I	3033456	3033916
SPAC3G6.07	SPAC3G6.07	-0.68	1.27	0.00389154	0.00940694	I	5392191	5392898
SPNCRNA.1506	SPNCRNA.1506	-0.68	0.89	3.74886e-05	0.000188734	II	2339630	2340238
SPNCRNA.1554	SPNCRNA.1554	-0.68	1.05	0.000118287	0.000488222	II	2826642	2827645
SPAC821.04c	cid13	-0.67	6.65	0.000263501	0.000960376	I	983567	987084
SPAC11G7.01	SPAC11G7.01	-0.67	6.37	0.00141152	0.00396783	I	3959727	3962914
SPBC119.03	SPBC119.03	-0.67	7.5	4.38589e-09	1.28737e-07	II	717888	718991
SPCC1450.13c	SPCC1450.13c	-0.67	6.48	4.80238e-11	3.39523e-09	III	1757320	1758409
SPCC330.03c	SPCC330.03c	-0.67	5.33	3.17169e-05	0.000164204	III	109597	110654
SPNCRNA.1132	dis1-antisense-1	-0.67	1.38	0.00139907	0.00393959	III	342960	346745
SPAC1B3.16c	vht1	-0.66	10.22	5.67719e-10	2.57431e-08	I	4958698	4961033
SPBC1E8.04	Tf2-10	-0.66	5.34	0.000155944	0.000619162	II	1965390	1969387
SPNCRNA.1287	SPNCRNA.1287	-0.66	5.44	1.80224e-06	1.6492e-05	III	2319056	2320085
SPCC548.06c	ght8	-0.66	9.34	0.00140989	0.00396664	III	226336	230546
SPAC19G12.10c	cpy1	-0.65	10.91	9.17083e-10	3.79234e-08	I	4061377	4064952
SPBC336.03	efc25	-0.65	6	0.00134574	0.00381227	II	2739656	2743519
SPAC1F7.14c	tam6	-0.64	2.52	5.88836e-07	6.62944e-06	I	4222648	4222893
SPAC630.08c	erg25	-0.64	7.06	0.00104846	0.00308301	I	359638	361266
SPAPB8E5.05	mfm1	-0.64	4.23	0.0102419	0.0214939	I	4916603	4917521
SPBC776.05	SPBC776.05	-0.64	4.95	1.88924e-08	4.3585e-07	II	3181709	3183754
SPBC16E9.16c	lsd90	-0.64	7.1	0.000830722	0.0025217	II	1947985	1950255
SPCC1919.06c	wtf25	-0.64	3.65	3.60229e-07	4.63504e-06	III	2217816	2220401
SPCC1494.09c	tfb6	-0.64	3.71	3.86391e-05	0.00019349	III	2342622	2343919
SPAC8F11.10c	pvg1	-0.63	8.17	3.14181e-06	2.54089e-05	I	2869644	2871785
SPAC15E1.07c	moa1	-0.63	-0.47	0.00811559	0.0175758	I	3728516	3729034
SPBC12C2.04	SPBC12C2.04	-0.63	6.87	5.06539e-06	3.71404e-05	II	2468858	2470506
SPBC12C2.03c	SPBC12C2.03c	-0.63	7.48	6.4205e-05	0.000293566	II	2473006	2475652
SPCC13B11.03c	SPCC13B11.03c	-0.63	3.11	1.82427e-06	1.65215e-05	III	1594872	1596605
SPAC15A10.09c	pun1	-0.62	5.45	1.36817e-05	8.29097e-05	I	3694974	3696517
SPAC1F3.08c	SPAC1F3.08c	-0.62	-1.81	0.0171947	0.0333599	I	633148	633474
SPBP23A10.11c	SPBP23A10.11c	-0.62	8.3	0.000727987	0.00224193	II	2018920	2021589
SPAC19A8.16	prl65	-0.61	3.52	2.66272e-05	0.000142452	I	2472433	2472961
SPAC18G6.09c	SPAC18G6.09c	-0.61	6.88	0.00297227	0.00747902	I	2231661	2234214
SPNCRNA.1346	SPNCRNA.1346	-0.61	4.58	1.62266e-06	1.52414e-05	II	359391	359866
SPCC736.13	SPCC736.13	-0.6	5.9	1.04233e-05	6.70577e-05	III	340648	342096
SPNCRNA.1181	rgf3-antisense-1	-0.6	4.89	0.0167364	0.0325857	III	1241936	1244247
SPAC4G9.07	mug133	-0.59	3.22	2.24508e-05	0.000124254	I	2262789	2265404
SPAC24H6.05	cdc25	-0.59	5.78	0.0018066	0.0048722	I	479228	482556
SPAC3G9.11c	SPAC3G9.11c	-0.59	8.69	0.00259377	0.00664098	I	3159753	3162245
SPAC2H10.01	SPAC2H10.01	-0.59	4.16	0.0242595	0.0443688	I	5273012	5275983
SPBC577.12	dph6	-0.59	5.98	2.06372e-10	1.0769e-08	II	773121	775489
SPNCRNA.1673	SPNCRNA.1673	-0.59	3.81	1.15745e-07	1.84714e-06	II	4129491	4131375
SPBC530.07c	SPBC530.07c	-0.59	8.07	6.10995e-05	0.000280733	II	804139	805686
SPCC306.08c	mdh1	-0.59	7.79	6.29595e-07	6.97712e-06	III	421646	423488
SPAC23H3.11c	SPAC23H3.11c	0.59	6.09	4.77841e-11	3.39523e-09	I	2512905	2514941
SPAC1039.03	SPAC1039.03	0.59	5.28	5.12747e-08	9.69331e-07	I	5452105	5453867
SPBC1778.02	rap1	0.59	5.33	7.72511e-12	7.69585e-10	II	3098295	3100698
SPNCRNA.383	SPNCRNA.383	0.59	1.57	0.00152598	0.00423884	II	1969856	1970296
SPNCRNA.68	prl68	0.59	-0.41	0.00400871	0.00963351	II	2204841	2205295
SPAC13A11.06	SPAC13A11.06	0.6	4.71	1.73509e-08	4.04546e-07	I	585355	587495
SPBC1105.19	tam12	0.6	2.43	2.45725e-06	2.09551e-05	II	3509703	3509903
SPCC1494.01	SPCC1494.01	0.6	5.25	1.40184e-08	3.36391e-07	III	2315606	2317771
SPNCRNA.709	SPNCRNA.709	0.61	2.67	3.54488e-05	0.00018012	I	1057647	1058238
SPAC23H4.05c	SPAC23H4.05c	0.61	1.93	0.000136274	0.000549693	I	1599323	1600363
SPBPB2B2.06c	SPBPB2B2.06c	0.61	7.68	3.81909e-07	4.85354e-06	II	4469018	4471207
SPBC21B10.11	dpm2	0.61	3.4	5.93848e-07	6.66306e-06	II	1649990	1650658
SPNCRNA.1562	SPNCRNA.1562	0.61	2.68	2.64093e-06	2.22332e-05	II	2901347	2902607
SPBC1683.01	SPBC1683.01	0.61	7.38	0.000244029	0.000899027	II	132353	136275
SPSNRNA.04	snu4	0.61	0.1	0.00504309	0.0117084	II	467233	467361
SPCC417.04	SPCC417.04	0.61	4.03	2.30923e-07	3.24076e-06	III	1673314	1673856
SPAC17G8.14c	pck1	0.62	8.26	1.59329e-10	8.94464e-09	I	2367140	2370652
SPAC869.02c	SPAC869.02c	0.62	6.9	1.34039e-05	8.18295e-05	I	5517865	5519950
SPNCRNA.727	SPNCRNA.727	0.62	-0.09	0.0233145	0.0429151	I	1234476	1235111
SPBC8E4.05c	SPBC8E4.05c	0.62	3.99	3.65559e-08	7.37286e-07	II	4430181	4431679
SPBPB7E8.01	SPBPB7E8.01	0.62	8.59	8.29384e-06	5.55316e-05	II	3491819	3496777
SPCC1223.12c	meu10	0.62	3.77	0.000199222	0.000760234	III	1866916	1871663
SPNCRNA.1056	mug106-antisense-1	0.63	2.66	2.70217e-07	3.68605e-06	I	5174913	5176145
SPAC1039.10	mmf2	0.63	2.88	3.70901e-07	4.72612e-06	I	5470432	5471520
SPAC26F1.05	mug106	0.63	2.65	4.43824e-07	5.36828e-06	I	5174625	5175819
SPNCRNA.1087	gto1-antisense-1	0.63	4.12	1.9682e-05	0.000111176	I	5472729	5475847
SPBC16D10.08c	hsp104	0.63	8.21	2.29441e-07	3.23036e-06	II	3612265	3615320
SPNCRNA.1606	SPNCRNA.1606	0.63	6.43	4.5454e-07	5.46362e-06	II	3491435	3494442
SPNCRNA.1556	SPNCRNA.1556	0.63	2.36	5.82411e-07	6.61373e-06	II	2863118	2863575
SPBP26C9.02c	car1	0.63	6.86	1.2515e-05	7.74096e-05	II	323944	325565
SPNCRNA.756	SPNCRNA.756	0.64	3.01	2.56694e-05	0.000138341	I	1712166	1712705
SPNCRNA.80	SPNCRNA.80	0.64	0.19	0.00315273	0.00784603	I	1572010	1572308
SPNCRNA.1334	SPNCRNA.1334	0.64	3.82	7.67222e-08	1.33452e-06	II	275118	275866
SPNCRNA.110	SPNCRNA.110	0.64	-0.86	0.0105421	0.0220256	II	2084400	2084672
SPCC1442.01	ste6	0.64	6.08	1.0776e-09	4.2682e-08	III	1765913	1768971
SPAC14C4.03	mek1	0.65	4.17	8.39869e-09	2.19132e-07	I	5231140	5232566
SPNCRNA.766	SPNCRNA.766	0.65	3.62	3.25867e-06	2.61608e-05	I	1874206	1875627
SPNCRNA.1088	SPNCRNA.1088	0.65	2.16	4.55969e-05	0.000221234	I	5478303	5478903
SPAC1142.09	SPAC1142.09	0.65	-0.79	0.00544062	0.0124772	I	3642498	3642845
SPNCRNA.1312	abc3-antisense-1	0.65	7.39	1.36098e-07	2.09565e-06	II	123704	126325
SPNCRNA.1390	SPNCRNA.1390	0.65	2.31	5.20465e-05	0.000246014	II	841655	842563
SPBC12C2.14c	SPBC12C2.14c	0.65	-0.46	0.0040337	0.00968648	II	2471721	2472056
SPCC569.01c	SPCC569.01c	0.65	4.83	3.96078e-07	5.00436e-06	III	2434691	2436530
SPAC1F8.08	SPAC1F8.08	0.66	4.51	3.10103e-08	6.4934e-07	I	103941	104953
SPNCRNA.867	SPNCRNA.867	0.66	3.67	9.63597e-07	9.80751e-06	I	2973017	2976287
SPNCRNA.767	SPNCRNA.767	0.66	2.7	1.35758e-05	8.24198e-05	I	1874245	1875080
SPAC8E11.12	SPAC8E11.12	0.66	-0.43	0.0117337	0.0240474	I	3374696	3375004
SPBC359.05	abc3	0.66	8.14	1.66015e-07	2.48447e-06	II	122657	127461
SPBC1773.14	arg7	0.67	5.59	3.53691e-10	1.70994e-08	II	312809	314761
SPBC32H8.13c	mok12	0.67	7.33	4.61352e-10	2.15134e-08	II	1478007	1486116
SPNCRNA.1609	SPNCRNA.1609	0.67	3.29	2.11023e-07	3.01644e-06	II	3513210	3514247
SPNCRNA.1622	SPNCRNA.1622	0.67	5.01	0.000456846	0.00151247	II	3605352	3607271
SPNCRNA.823	SPNCRNA.823	0.68	2.24	1.07354e-05	6.85962e-05	I	2404749	2405441
SPBC21H7.05	sfc6	0.68	6.32	2.62979e-12	3.32517e-10	II	2261925	2264164
SPNCRNA.51	prl51	0.68	-1.25	0.00163286	0.00449209	III	1514062	1514343
SPAC11D3.14c	SPAC11D3.14c	0.69	6.51	4.74125e-13	8.20361e-11	I	131190	135736
SPAC27E2.14	SPAC27E2.14	0.69	3.3	1.63171e-07	2.46067e-06	I	4012418	4012891
SPAC977.14c	SPAC977.14c	0.69	8.39	5.20074e-07	6.06292e-06	I	59614	60907
SPAP7G5.06	per1	0.69	6.54	1.45918e-05	8.67173e-05	I	3748767	3751729
SPNCRNA.421	SPNCRNA.421	0.69	3.22	2.80773e-07	3.79852e-06	II	3512862	3513996
SPNCRNA.1493	SPNCRNA.1493	0.69	0.32	7.81823e-05	0.000344999	II	2186564	2187406
SPBC460.01c	SPBC460.01c	0.7	5.4	2.45484e-08	5.36336e-07	AB325691	1479	3197
SPNCRNA.609	SPAC11D3.14c-antisense-1	0.7	6.49	4.09684e-13	7.75631e-11	I	131203	135541
SPNCRNA.907	SPNCRNA.907	0.7	1.67	1.425e-05	8.51182e-05	I	3405538	3405929
SPNCRNA.1059	SPNCRNA.1059	0.7	2.22	0.000125038	0.000511271	I	5200663	5202023
SPNCRNA.1058	SPNCRNA.1058	0.7	2.23	0.000137066	0.000552213	I	5200370	5201855
SPNCRNA.1431	SPNCRNA.1431	0.71	2.99	1.24357e-05	7.70639e-05	II	1354306	1355953
SPNCRNA.1582	SPBC405.06-antisense-1	0.71	-0.59	0.0108631	0.022568	II	3150258	3152904
SPCC1235.10c	sec6	0.71	7	1.05415e-09	4.20573e-08	III	196513	199449
SPNCRNA.1248	SPNCRNA.1248	0.71	0.29	0.000192785	0.000738947	III	1967055	1967807
SPAC11D3.07c	toe4	0.72	7.04	9.4947e-12	9.04618e-10	I	116054	120309
SPAC977.10	sod2	0.72	5.74	1.99364e-09	6.72214e-08	I	50946	53858
SPAC1039.11c	gto1	0.72	5.32	4.07966e-07	5.11904e-06	I	5471270	5474941
SPNCRNA.1073	SPNCRNA.1073	0.72	2.05	1.35336e-05	8.23155e-05	I	5328562	5329060
SPNCRNA.525	SPNCRNA.525	0.72	2.49	2.58861e-05	0.000139281	I	5328400	5329064
SPNCRNA.1317	mal1-antisense-1	0.72	3.53	2.01719e-08	4.60522e-07	II	154152	154516
SPNCRNA.1389	SPNCRNA.1389	0.72	3	6.532e-07	7.15828e-06	II	841331	842790
SPNCRNA.1355	SPNCRNA.1355	0.72	1.56	1.23173e-05	7.66187e-05	II	412735	413409
SPNCRNA.621	SPNCRNA.621	0.73	2.99	1.14007e-07	1.83275e-06	I	203597	204322
SPAC22F3.12c	rgs1	0.73	5.01	3.18999e-07	4.21168e-06	I	679062	681890
SPATRNAPRO.02	SPATRNAPRO.02	0.73	0.28	0.00985686	0.0207987	I	1314924	1315020
SPNCRNA.1671	SPBC56F2.03-antisense-1	0.73	4.62	1.29525e-09	5.00958e-08	II	4120895	4123007
SPBCPT2R1.10	SPBCPT2R1.10	0.73	-2.04	0.011696	0.0239792	II	4526225	4526884
SPAC589.07c	atg1801	0.74	4.51	3.73755e-11	2.73049e-09	I	3104101	3105908
SPNCRNA.721	SPNCRNA.721	0.74	2.1	7.99922e-07	8.5105e-06	I	1191107	1192276
SPNCRNA.993	SPNCRNA.993	0.74	0.75	0.00125986	0.00360782	I	4515182	4515993
SPNCRNA.1534	SPNCRNA.1534	0.74	2.86	8.021e-07	8.51988e-06	II	2601158	2601839
SPNCRNA.392	SPNCRNA.392	0.74	-0.24	0.00519741	0.0120243	II	2162782	2163089
SPNCRNA.1296	SPNCRNA.1296	0.74	3.86	2.45532e-08	5.36336e-07	III	2422419	2423268
SPNCRNA.1111	SPNCRNA.1111	0.74	3.57	3.96597e-06	3.05655e-05	III	119206	120139
SPNCRNA.1110	SPNCRNA.1110	0.74	3.58	4.22954e-06	3.22613e-05	III	118970	119962
SPAC922.05c	SPAC922.05c	0.75	5.3	1.88216e-10	1.00611e-08	I	5482879	5486451
SPBC1773.03c	SPBC1773.03c	0.75	5.66	6.21391e-11	4.30068e-09	II	285909	288246
SPBC428.07	meu6	0.75	6	7.77288e-11	5.11067e-09	II	454108	456553
SPNCRNA.612	SPAC5H10.01-antisense-1	0.76	3.31	6.61453e-08	1.18503e-06	I	146871	148041
SPNCRNA.729	SPNCRNA.729	0.76	-2.71	0.0240096	0.0440098	I	1236996	1238533
SPCC550.07	SPCC550.07	0.76	5.36	7.68576e-11	5.10443e-09	III	1196729	1199999
SPNCRNA.624	SPAC24B11.14-antisense-1	0.77	3.5	5.27536e-10	2.42556e-08	I	229270	230855
SPAC1F8.05	isp3	0.78	5.35	7.64192e-10	3.22087e-08	I	95961	96966
SPAC5H10.01	SPAC5H10.01	0.78	3.39	4.80005e-08	9.22816e-07	I	146974	148055
SPAC24B11.14	SPAC24B11.14	0.78	2.35	1.02185e-07	1.67557e-06	I	230545	231136
SPAC1039.02	SPAC1039.02	0.79	7.5	5.85932e-09	1.63242e-07	I	5448735	5451642
SPAC1039.08	SPAC1039.08	0.79	4.09	6.1713e-09	1.70489e-07	I	5463863	5465172
SPNCRNA.606	isp3-antisense-1	0.79	4.46	8.25383e-08	1.41694e-06	I	95159	96525
SPBC56F2.03	SPBC56F2.03	0.79	4.25	4.07192e-09	1.21144e-07	II	4121444	4122628
SPNCRNA.299	SPNCRNA.299	0.79	-0.32	0.000283464	0.00102019	II	274745	275832
SPNCRNA.1297	SPNCRNA.1297	0.79	3.93	6.99517e-09	1.88497e-07	III	2422707	2423873
SPNCRNA.1097	SPNCRNA.1097	0.8	4.72	2.35131e-10	1.21731e-08	III	39627	41424
SPNCRNA.454	SPNCRNA.454	0.8	1.64	2.99455e-08	6.32888e-07	III	76513	77990
SPNCRNA.1237	SPNCRNA.1237	0.8	1.65	4.2109e-05	0.000207737	III	1867057	1868077
SPATRNALYS.05	SPATRNALYS.05	0.81	-2.13	0.0180999	0.0348177	I	3086310	3086392
SPNCRNA.560	atg1801-antisense-1	0.82	4.14	1.32682e-10	7.72019e-09	I	3104356	3105524
SPNCRNA.93	SPNCRNA.93	0.82	-0.72	0.000724985	0.00223478	I	3876757	3877223
SPBC1773.13	SPBC1773.13	0.83	5.23	3.18034e-09	9.75684e-08	II	310402	312518
SPBPB2B2.10c	gal7	0.83	5.04	2.78557e-07	3.77631e-06	II	4482234	4483799
SPAC922.06	SPAC922.06	0.84	4.06	1.57154e-09	5.65822e-08	I	5485096	5486287
SPAC922.03	SPAC922.03	0.84	4.67	1.30916e-08	3.16461e-07	I	5476698	5478012
SPBC27.03	meu25	0.84	5.41	4.82657e-12	5.20241e-10	II	1563859	1566027
SPNCRNA.294	SPNCRNA.294	0.84	-1.13	0.0177044	0.0341768	II	127311	127803
SPAC3G9.01	nsk1	0.85	4.88	5.37403e-08	9.98142e-07	I	3181430	3183290
SPBC725.06c	ppk31	0.85	6.98	7.08955e-14	2.20568e-11	II	1212690	1216671
SPNCRNA.1421	ppk3-antisense-1	0.85	6.99	7.30705e-14	2.20568e-11	II	1212519	1216202
SPNCRNA.1446	meu25-antisense-1	0.85	5.36	3.21208e-12	3.77229e-10	II	1563622	1565852
SPAC11D3.13	hsp3104	0.86	4.84	6.66195e-10	2.88173e-08	I	130148	131268
SPAC11D3.03c	SPAC11D3.03c	0.86	3.84	2.48253e-09	8.05915e-08	I	110904	112499
SPNCRNA.1305	SPBPB21E7.08-antisense-1	0.86	6.23	0.000315287	0.00111213	II	71485	73328
SPBPB21E7.08	SPBPB21E7.08	0.86	6.21	0.000331879	0.00115946	II	72081	73390
SPAC9E9.02	SPAC9E9.02	0.87	3.09	5.53301e-08	1.02478e-06	I	4434478	4437145
SPAC11D3.05	mfs2	0.87	4.07	9.89785e-07	9.98135e-06	I	113950	115962
SPNCRNA.1339	SPNCRNA.1339	0.87	1.89	3.7819e-06	2.93231e-05	II	329976	330635
SPNCRNA.431	SPNCRNA.431	0.87	1.19	1.62352e-05	9.48855e-05	II	3956453	3957044
SPAC11D3.06	SPAC11D3.06	0.88	6.4	1.99672e-11	1.705e-09	I	116331	118189
SPNCRNA.467	SPNCRNA.467	0.88	-0.9	0.000780809	0.00238671	III	583036	583289
SPNCRNA.607	fta5-antisense-1	0.89	4.85	6.87749e-10	2.95552e-08	I	99046	101140
SPBC359.03c	aat1	0.89	8.14	3.17974e-12	3.77229e-10	II	111007	113472
SPNCRNA.457	ark1-antisense-1	0.89	-1.27	0.00208744	0.00550232	III	141429	141634
SPCC550.10	atd3	0.9	5.21	3.78036e-12	4.28549e-10	III	1204315	1206695
SPAC1F8.06	fta5	0.91	4.73	3.02195e-09	9.46159e-08	I	99871	101431
SPATRNAMET.01	SPATRNAMET.01	0.91	-2.6	0.024113	0.0441871	I	1096474	1096545
SPNCRNA.1179	atd3-antisense-1	0.91	5.17	4.78731e-12	5.20241e-10	III	1204934	1206655
SPNCRNA.1238	meu10-antisense-1	0.91	2.29	3.52412e-06	2.78164e-05	III	1868057	1869906
SPAC922.07c	atd2	0.92	5.82	2.95676e-11	2.26055e-09	I	5486848	5488830
SPNCRNA.1090	atd2-antisense-1	0.92	5.4	3.37531e-11	2.49355e-09	I	5487525	5488928
SPNCRNA.195	SPNCRNA.195	0.92	1.46	2.30427e-06	1.99261e-05	I	2438820	2439389
SPCTRNASER.09	SPCTRNASER.09	0.92	-2.2	0.00740612	0.0162426	III	1066628	1066709
SPNCRNA.1086	SPAC1039.08-antisense-1	0.93	4.39	1.03859e-10	6.50353e-09	I	5463940	5466070
SPATRNAPHE.02	SPATRNAPHE.02	0.93	-2.43	0.0190353	0.0363195	I	3752334	3752406
SPNCRNA.04	prl4	0.93	-0.69	0.00185818	0.00498675	II	3295176	3295428
SPNCRNA.1096	SPCC1884.01-antisense-1	0.93	5.25	3.23669e-11	2.41833e-09	III	37658	39319
SPNCRNA.831	SPNCRNA.831	0.94	-1.48	0.00494317	0.0115288	I	2519375	2521586
SPBC839.19	new20	0.94	2.31	5.93747e-09	1.64721e-07	II	604418	604920
SPBTRNATYR.04	SPBTRNATYR.04	0.94	-1.83	0.00265525	0.00677744	II	3814558	3814641
SPNCRNA.944	SPNCRNA.944	0.95	-0.21	4.63274e-05	0.000223973	I	3876714	3877850
SPAC9E9.01	SPAC9E9.01	0.95	-0.19	0.000394539	0.00133785	I	4434861	4435509
SPBPB2B2.18	SPBPB2B2.18	0.96	1.91	8.5288e-06	5.67006e-05	II	4502692	4503664
SPAC869.05c	SPAC869.05c	0.98	7.18	8.19306e-11	5.3336e-09	I	5505583	5508782
SPNCRNA.1091	put4-antisense-1	0.98	6.14	1.13326e-10	7.02942e-09	I	5492628	5494800
SPAC869.10c	put4	0.98	6.14	1.41782e-10	8.03634e-09	I	5492902	5495156
SPBC1683.09c	frp1	0.98	5.67	1.51108e-06	1.43367e-05	II	160357	162497
SPBC16A3.13	meu7	0.99	6.34	7.38022e-14	2.20568e-11	II	4272341	4274665
SPBP35G2.17	SPBP35G2.17	0.99	4.08	9.51011e-10	3.86333e-08	II	963856	965899
SPNCRNA.512	SPNCRNA.512	0.99	0.38	1.75844e-05	0.000101064	III	2107603	2107915
SPNCRNA.871	SPNCRNA.871	1	4.25	1.01979e-12	1.55934e-10	I	2996868	2998123
SPNCRNA.934	SPNCRNA.934	1.01	7.75	1.9761e-09	6.69734e-08	I	3745764	3748595
SPNCRNA.1685	meu7-antisense-1	1.01	5.45	1.21211e-12	1.77103e-10	II	4272084	4273442
SPNCRNA.415	SPNCRNA.415	1.01	0.52	7.35239e-06	5.00434e-05	II	3154684	3155288
SPNCRNA.335	SPNCRNA.335	1.01	0.85	7.48584e-06	5.0794e-05	II	949972	950606
SPNCRNA.935	SPNCRNA.935	1.02	7.73	1.66321e-09	5.79823e-08	I	3745778	3748833
SPNCRNA.21	prl21	1.02	-0.29	0.000475731	0.00156867	I	5454229	5454498
SPNCRNA.506	SPNCRNA.506	1.02	-0.48	2.77274e-05	0.00014716	III	1932092	1933051
SPNCRNA.1696	SPNCRNA.1696	1.03	4.53	9.55797e-07	9.75833e-06	II	4464625	4466286
SPRRNA.12	SPRRNA.12	1.04	-2.35	0.0180014	0.0346486	I	912230	912396
SPBC460.04c	SPBC460.04c	1.05	3.13	5.09965e-09	1.45784e-07	AB325691	14073	15248
SPNCRNA.360	SPNCRNA.360	1.07	-2.64	0.0116099	0.023825	II	1606372	1609066
SPAC31G5.07	dni1	1.08	3.65	2.24371e-11	1.83341e-09	I	2997453	2998157
SPBPB2B2.09c	pan5	1.08	6.18	1.35746e-10	7.82923e-09	II	4478687	4480222
SPNCRNA.1089	SPNCRNA.1089	1.09	0.46	2.83542e-06	2.3539e-05	I	5478367	5479836
SPBC359.01	SPBC359.01	1.09	5.38	4.62891e-12	5.15849e-10	II	104609	107221
SPNCRNA.444	SPNCRNA.444	1.09	-2.44	0.00335034	0.00827965	II	4435937	4436680
SPNCRNA.1107	SPNCRNA.1107	1.09	-0.03	3.97003e-06	3.05655e-05	III	108832	109337
SPNCRNA.703	SPNCRNA.703	1.1	1.91	7.24371e-08	1.27687e-06	I	993887	995063
SPBPB2B2.13	gal1	1.1	5.67	7.1969e-10	3.05288e-08	II	4488322	4490271
SPNCRNA.1310	SPNCRNA.1310	1.1	0.34	4.0211e-06	3.08864e-05	II	109405	109905
SPNCRNA.1262	SPNCRNA.1262	1.11	1.28	6.89458e-06	4.75177e-05	III	2107549	2108268
SPNCRNA.1697	gal1-antisense-1	1.12	5.2	5.81143e-10	2.61713e-08	II	4488684	4489829
SPBPB2B2.12c	gal10	1.12	4.92	5.42822e-09	1.53178e-07	II	4484023	4487569
SPCC1884.01	SPCC1884.01	1.12	4.16	6.56331e-14	2.20568e-11	III	36972	38788
SPNCRNA.452	SPNCRNA.452	1.12	-0.49	5.48428e-06	3.95819e-05	III	54496	55150
SPCP20C8.04	new22	1.12	-2.28	0.0070095	0.0154656	III	36421	36657
SPBPB2B2.11	SPBPB2B2.11	1.13	4.92	1.47824e-09	5.42986e-08	II	4483683	4487313
SPAC186.05c	SPAC186.05c	1.14	7.05	2.25864e-11	1.83341e-09	I	5540032	5541502
SPCP20C8.02c	SPCP20C8.02c	1.14	3.27	1.44253e-11	1.28171e-09	III	30561	31740
SPAPB24D3.03	SPAPB24D3.03	1.16	6.72	1.33079e-09	5.08716e-08	I	2952226	2953762
SPNCRNA.1315	SPNCRNA.1315	1.16	2.39	4.04727e-09	1.21073e-07	II	141285	142180
SPNCRNA.844	SPNCRNA.844	1.17	4.32	1.43256e-12	2.04763e-10	I	2682538	2684586
SPAC212.04c	SPAC212.04c	1.17	4	9.49266e-07	9.75833e-06	I	21381	23050
SPAC212.10	SPAC212.10	1.17	-0.69	2.4065e-06	2.05757e-05	I	5726	6331
SPNCRNA.273	SPNCRNA.273	1.17	-1.38	0.00112226	0.00327076	I	5444019	5444123
SPNCRNA.456	SPNCRNA.456	1.18	-2.01	0.0018148	0.00489028	III	141220	141422
SPNCRNA.297	SPNCRNA.297	1.19	1.68	3.20959e-09	9.76992e-08	II	141435	141927
SPNCRNA.406	SPNCRNA.406	1.19	0.39	8.35104e-07	8.75727e-06	II	2738941	2739592
SPBPB21E7.09	SPBPB21E7.09	1.21	5.92	2.47603e-11	1.96144e-09	II	75073	77625
SPNCRNA.1243	SPNCRNA.1243	1.22	2.4	9.76858e-11	6.17581e-09	III	1933436	1935331
SPCP20C8.03	SPCP20C8.03	1.23	2.54	1.01622e-12	1.55934e-10	III	32624	33393
SPNCRNA.279	SPNCRNA.279	1.24	2.68	4.05112e-09	1.21073e-07	I	5504488	5505476
SPNCRNA.425	SPNCRNA.425	1.27	2.94	1.40087e-09	5.30591e-08	II	3605142	3606517
SPNCRNA.275	SPNCRNA.275	1.29	-0.54	2.38122e-06	2.04127e-05	I	5465093	5465740
SPNCRNA.310	SPNCRNA.310	1.29	-0.4	5.90982e-06	4.18268e-05	I	5543364	5543438
SPMIT.09	atp8	1.3	3.46	0.00462055	0.0108656	MT	16914	17060
SPAC212.12	SPAC212.12	1.33	3.99	2.63562e-07	3.60274e-06	I	15855	16226
SPBPB2B2.17c	SPBPB2B2.17c	1.34	0.6	5.27968e-07	6.1116e-06	II	4501956	4502396
SPAC977.13c	SPAC977.13c	1.38	2.23	2.34216e-09	7.69984e-08	I	58277	59105
SPNCRNA.278	SPNCRNA.278	1.4	-2.38	0.00612377	0.0137795	I	5481585	5482068
SPAC977.01	SPAC977.01	1.41	2	7.03024e-10	3.00155e-08	I	29764	31069
SPAC1F8.03c	str3	1.41	7.26	5.0415e-07	5.94085e-06	I	88201	90300
SPAC1039.09	isp5	1.42	4.77	1.25488e-09	4.88216e-08	I	5465377	5468649
SPAC4H3.12c	SPAC4H3.12c	1.43	-1.8	0.000314815	0.00111106	I	3851646	3852219
SPNCRNA.605	SPAC1F8.04c-antisense-1	1.49	5.34	3.38269e-10	1.67227e-08	I	90949	94038
SPNCRNA.480	SPNCRNA.480	1.5	0.56	1.27864e-07	1.99692e-06	III	1066011	1066485
SPBC460.05	SPBC460.05	1.52	5	1.63685e-09	5.79722e-08	AB325691	16470	18062
SPCTRNAHIS.03	SPCTRNAHIS.03	1.52	-2.15	0.000598757	0.00190277	III	71400	71471
SPAC1F8.04c	SPAC1F8.04c	1.53	4.96	1.60527e-10	8.94464e-09	I	92387	93931
SPBPB2B2.02	mug180	1.54	3.43	1.34081e-11	1.20765e-09	II	4460486	4462134
SPNCRNA.139	SPNCRNA.139	1.55	-1.48	1.45931e-05	8.67173e-05	I	90868	91753
SPNCRNA.604	SPNCRNA.604	1.56	3.73	1.13758e-09	4.4788e-08	I	90681	91753
SPNCRNA.1309	alr2-antisense-1	1.56	6.56	5.94691e-12	6.01553e-10	II	107514	108774
SPBC359.02	alr2	1.57	6.59	5.34389e-12	5.61994e-10	II	107583	109353
SPNCRNA.603	SPNCRNA.603	1.58	1.13	0.00029927	0.0010665	I	81468	82345
SPNCRNA.602	SPNCRNA.602	1.62	3.48	5.47036e-12	5.61994e-10	I	50851	51545
SPNCRNA.292	SPNCRNA.292	1.63	0.3	3.65528e-07	4.66669e-06	II	114092	114583
SPAC212.11	tlh1	1.64	0.9	1.91655e-07	2.81279e-06	I	1	5662
SPAC1F8.02c	shu1	1.65	2.18	1.14162e-05	7.20362e-05	I	85566	86324
SPBPB2B2.05	SPBPB2B2.05	1.65	3.9	6.5928e-10	2.8742e-08	II	4466517	4467612
SPAC186.06	SPAC186.06	1.68	4.51	9.63092e-12	9.04618e-10	I	5542290	5543031
SPAC750.01	SPAC750.01	1.69	4.58	5.22866e-13	8.81499e-11	I	5555716	5556768
SPAC869.09	SPAC869.09	1.72	2.39	7.79637e-09	2.06698e-07	I	5496844	5497448
SPNCRNA.1302	eno102-antisense-1	1.76	6.18	6.08504e-11	4.25629e-09	II	58453	59684
SPBPB21E7.01c	eno102	1.76	6.21	6.33885e-11	4.34145e-09	II	58136	59704
SPBP4G3.03	fub2	1.77	4.73	2.45575e-10	1.26145e-08	II	4453054	4454161
SPAC212.07c	SPAC212.07c	1.78	2.07	1.26471e-10	7.42453e-09	I	13665	14555
SPNCRNA.1695	SPBP4G3.03-antisense-1	1.78	4.53	1.21703e-10	7.2745e-09	II	4453287	4454737
SPAC750.05c	SPAC750.05c	1.81	3.73	7.10544e-14	2.20568e-11	I	5565881	5567337
SPNCRNA.1093	SPAC869.09-antisense-1	1.82	2.51	1.49936e-09	5.47683e-08	I	5496942	5497837
SPNCRNA.1092	SPNCRNA.1092	1.84	2.17	8.12294e-12	7.97139e-10	I	5495270	5496597
SPAC977.17	SPAC977.17	1.88	4.69	1.79639e-10	9.76138e-09	I	66219	69821
SPAC977.18	SPAC977.18	1.88	2.14	1.16812e-08	2.89826e-07	I	31140	32345
SPNCRNA.268	SPNCRNA.268	1.89	1.54	8.39576e-10	3.4938e-08	I	5411152	5411543
SPNCRNA.117	SPNCRNA.117	1.9	-1.12	3.64382e-07	4.66176e-06	II	4439928	4440156
SPBCPT2R1.08c	tlh2	1.92	3.95	4.6483e-13	8.20361e-11	II	4526885	4532899
SPNCRNA.291	SPNCRNA.291	1.97	3.44	3.02544e-15	2.21025e-12	II	103165	104528
SPBPB21E7.11	SPBPB21E7.11	1.98	2.91	1.2941e-13	3.34984e-11	II	61526	63086
SPAC750.06c	SPAC750.06c	2.02	1.97	3.13548e-10	1.58583e-08	I	5568903	5569803
SPBPB10D8.01	SPBPB10D8.01	2.02	4.89	2.5971e-11	2.03285e-09	II	80899	83357
SPBCPT2R1.04c	SPBCPT2R1.04c	2.07	1.77	2.04668e-11	1.72525e-09	II	4513401	4514815
SPNCRNA.70	SPNCRNA.70	2.09	-0.8	5.29765e-08	9.90957e-07	I	11027	11556
SPNCRNA.282	SPNCRNA.282	2.14	0.82	4.97732e-10	2.30464e-08	I	5517028	5517494
SPBPB21E7.10	SPBPB21E7.10	2.14	1.04	8.75021e-12	8.46068e-10	II	61362	62126
SPNCRNA.446	SPNCRNA.446	2.15	-0.13	6.39479e-09	1.75924e-07	II	4452172	4452793
SPAC977.16c	dak2	2.16	5.46	1.70621e-10	9.34862e-09	I	64559	66980
SPBPB2B2.08	SPBPB2B2.08	2.21	3.63	1.51637e-11	1.32935e-09	II	4475953	4476674
SPNCRNA.448	SPNCRNA.448	2.26	0.06	1.56992e-09	5.65822e-08	II	4499758	4501251
SPAC977.15	SPAC977.15	2.29	4.23	3.40582e-14	1.39958e-11	I	62961	63862
SPAC977.02	SPAC977.02	2.36	1.92	7.91588e-10	3.31509e-08	I	32034	33012
SPBPB2B2.01	SPBPB2B2.01	2.36	5.07	2.39078e-12	3.08224e-10	II	4457661	4459842
SPAC212.09c	SPAC212.09c	2.38	-0.43	1.28599e-07	2.00159e-06	I	7619	9274
SPBPB21E7.02c	SPBPB21E7.02c	2.38	1.07	1.67645e-10	9.26273e-09	II	60553	61205
SPBPB2B2.14c	SPBPB2B2.14c	2.4	0.68	5.45851e-12	5.61994e-10	II	4492580	4493364
SPAC750.03c	SPAC750.03c	2.41	1.51	3.18157e-13	6.53713e-11	I	5562608	5563045
SPAC212.06c	SPAC212.06c	2.43	1.48	1.60643e-12	2.20048e-10	I	18042	18974
SPNCRNA.1301	grt1-antisense-1	2.5	3.84	4.46882e-15	2.71014e-12	II	50110	52193
SPBCPT2R1.07c	SPBCPT2R1.07c	2.52	0.06	4.30594e-10	2.05156e-08	II	4523274	4524970
SPNCRNA.1299	SPNCRNA.1299	2.52	0.06	0.0152215	0.0301268	III	2448764	2449506
SPNCRNA.1303	SPNCRNA.1303	2.53	0.62	1.46139e-09	5.42862e-08	II	63602	64286
SPAC212.02	SPAC212.02	2.55	-2.19	2.88291e-07	3.86052e-06	I	27353	27763
SPAC186.09	SPAC186.09	2.56	2.09	5.584e-14	2.15969e-11	I	5552811	5554529
SPAC869.07c	mel1	2.57	2.83	1.50218e-13	3.52744e-11	I	5499768	5501236
SPNCRNA.61	prl61	2.58	1.48	4.12884e-13	7.75631e-11	I	5546205	5546648
SPAC869.08	pcm2	2.6	2.51	2.70496e-13	5.86543e-11	I	5497918	5499280
SPBPB10D8.02c	SPBPB10D8.02c	2.61	5.17	9.74704e-14	2.78638e-11	II	83229	85631
SPAC186.04c	SPAC186.04c	2.62	3.04	2.13576e-12	2.86584e-10	I	5538480	5539516
SPNCRNA.1307	SPBPB10D8.02c-antisense-1	2.65	4.95	1.35892e-13	3.34984e-11	II	83799	85528
SPBC359.04c	pfl7	2.73	4.23	2.32116e-16	5.0872e-13	II	117892	121286
SPBPB8B6.04c	grt1	2.74	4.9	1.09644e-15	1.02987e-12	II	47369	51220
SPNCRNA.293	SPNCRNA.293	2.75	2.35	2.76545e-13	5.86543e-11	II	120577	121643
SPAC212.08c	SPAC212.08c	2.79	2.3	1.72229e-14	7.54938e-12	I	11784	12994
SPAC186.07c	SPAC186.07c	2.82	2.18	4.53408e-15	2.71014e-12	I	5545615	5546613
SPBPB8B6.03	fah1	2.83	3.55	1.11501e-14	5.27356e-12	II	47056	49071
SPAC1F8.01	ght3	2.88	3.49	1.14098e-13	3.12582e-11	I	82746	84786
SPBPB21E7.06	SPBPB21E7.06	2.89	-0.45	3.116e-09	9.70982e-08	II	68355	68852
SPNCRNA.136	SPNCRNA.136	2.9	1.27	3.66077e-12	4.22273e-10	I	40795	41489
SPNCRNA.601	SPNCRNA.601	2.91	1.28	3.2129e-12	3.77229e-10	I	40916	41770
SPBC1348.04	SPBC1348.04	2.92	-0.31	3.18148e-10	1.59681e-08	II	12176	12750
SPAC977.06	SPAC977.06	2.95	0.27	2.35482e-12	3.08224e-10	I	39416	40072
SPAC977.04	SPAC977.04	2.99	-0.88	7.0447e-11	4.72642e-09	I	34298	34978
SPBC1348.12	SPBC1348.12	3	3.19	7.14637e-16	9.39747e-13	II	35112	36589
SPAC977.07c	pfl6	3.03	-0.54	9.98331e-09	2.5541e-07	I	42057	43307
SPAPJ695.02	SPAPJ695.02	3.12	3.11	1.2093e-11	1.10432e-09	I	74452	76721
SPBC1348.05	SPBC1348.05	3.14	0.59	1.14412e-10	7.03049e-09	II	13572	15378
SPNCRNA.281	SPNCRNA.281	3.22	0.22	2.73629e-11	2.1166e-09	I	5516331	5516951
SPBC1348.07	SPBC1348.07	3.27	0.36	2.3325e-11	1.87027e-09	II	19395	20606
SPAC186.08c	SPAC186.08c	3.31	0.64	1.96976e-10	1.03609e-08	I	5548884	5550012
SPAC212.03	SPAC212.03	3.42	-2.09	1.60136e-05	9.40927e-05	I	23589	24054
SPNCRNA.137	SPNCRNA.137	3.43	-1.1	2.88113e-08	6.13056e-07	I	71030	71470
SPBPB2B2.07c	SPBPB2B2.07c	3.45	-1.1	1.81883e-09	6.22854e-08	II	4474145	4474931
SPNCRNA.287	SPNCRNA.287	3.72	0.6	6.10529e-13	9.7908e-11	II	21060	21754
SPAPJ695.01c	SPAPJ695.01c	3.74	0.28	1.54986e-12	2.16815e-10	I	77480	78066
SPBPB8B6.02c	SPBPB8B6.02c	3.8	1.54	1.11841e-16	3.67676e-13	II	44694	46836
SPNCRNA.283	SPNCRNA.283	3.9	-1.76	6.44907e-10	2.86413e-08	I	5524889	5525299
SPNCRNA.37	prl37	3.93	-1.05	2.19706e-11	1.82857e-09	I	71982	72380
SPBPB2B2.15	SPBPB2B2.15	3.93	-1.22	1.34895e-06	1.29102e-05	II	4496373	4496984
SPNCRNA.284	SPNCRNA.284	3.95	-0.72	4.47507e-10	2.10182e-08	I	5525499	5525873
SPAC977.03	SPAC977.03	4.07	-1.42	1.92728e-10	1.02192e-08	I	33835	34272
SPAC977.05c	SPAC977.05c	4.08	-0.61	9.6164e-07	9.80276e-06	I	35768	36382
SPBC1348.14c	ght7	4.1	0.33	1.14998e-12	1.71844e-10	II	38514	40277
SPAC869.01	SPAC869.01	4.26	2.47	1.12289e-14	5.27356e-12	I	5521275	5523181
SPNCRNA.280	SPNCRNA.280	4.28	-1.66	2.86086e-09	9.04334e-08	I	5516040	5516265
SPBC1348.06c	SPBC1348.06c	4.38	-1.45	1.95671e-06	1.74328e-05	II	15981	16592
SPBC1348.08c	SPBC1348.08c	4.41	-1.7	1.41222e-09	5.30591e-08	II	22111	23529
SPAC186.01	pfl9	4.48	2.47	3.36867e-16	5.53724e-13	I	5527462	5528959
SPBPB10D8.03	SPBPB10D8.03	4.51	1.47	1.07706e-15	1.02987e-12	II	87727	89029
SPAC186.02c	SPAC186.02c	4.87	0.22	3.94453e-13	7.75631e-11	I	5529851	5531144
SPAC186.03	SPAC186.03	5.53	1.14	1.27183e-15	1.04529e-12	I	5535061	5536432
SPAC869.03c	SPAC869.03c	5.78	1.2	5.06717e-15	2.77639e-12	I	5512757	5514865
SPBC1348.11	SPBC1348.11	5.8	-0.58	2.22942e-13	5.05464e-11	II	33231	34780
SPAC869.04	SPAC869.04	6.76	1.11	4.54045e-13	8.20361e-11	I	5511137	5512369
FDR 05_ FC1.5

## Sheet: triple copy_up in G34K vs wt
geneID	log2FC	FC	log2AveExpr	P.Value	FDR	Gene.name	chr	start	end
SPAC212.11	1.98	3.94493	-1.86	0.000318745	0.0130665	tlh1	I	1	5662
SPAC212.08c	6.47	88.647	2.36	1.16962e-12	7.43179e-09	SPAC212.08c	I	11784	12994
SPAC212.07c	2.35	5.09824	-0.04	7.06008e-08	9.74248e-05	SPAC212.07c	I	13665	14555
SPAC212.12	3.09	8.51496	4.29	6.26675e-10	1.3273e-06	SPAC212.12	I	15855	16226
SPAC212.06c	1.96	3.89062	-0.32	1.44815e-07	9.74248e-05	SPAC212.06c	I	18042	18974
SPAC212.04c	1.4	2.63902	2.6	1.53328e-07	9.74248e-05	SPAC212.04c	I	21381	23050
SPNCRNA.612	0.62	1.53688	2.07	0.000329049	0.0131755	SPAC5H10.01-antisense-1	I	146871	148041
SPNCRNA.673	1.1	2.14355	0.02	0.00012372	0.00735421	rad15-antisense-1	I	664677	665246
SPAC22F3.02	0.88	1.84038	3.01	1.65484e-06	0.000556329	atf31	I	705042	708014
SPNCRNA.700	0.82	1.76541	1.29	0.000564443	0.0178371	mss1-antisense-1	I	951028	952560
SPAC1A6.08c	0.6	1.51572	2.68	0.000244892	0.0116122	mug125	I	1086242	1087505
SPNCRNA.711	0.99	1.98618	1	1.58446e-05	0.00180134	rad52-antisense-1	I	1099991	1101663
SPAC56F8.12	1.21	2.31338	-0.94	0.000102205	0.00636819	SPAC56F8.12	I	1146833	1148085
SPAPB17E12.09	1.32	2.49666	-0.21	9.59516e-06	0.00135484	SPAPB17E12.09	I	1280537	1281411
SPNCRNA.733	0.87	1.82766	0.92	8.26762e-05	0.00558856	SPAC1565.03-antisense-1	I	1294072	1294990
SPNCRNA.763	1.05	2.07053	2.75	1.22274e-05	0.00164381	sgt1-antisense-1	I	1813439	1815920
SPNCRNA.795	0.73	1.65864	3.48	8.75542e-06	0.00131955	utp5-antisense-1	I	2112071	2114599
SPNCRNA.799	0.84	1.79005	3.06	3.78576e-05	0.00325064	ata1-antisense-1	I	2146730	2148425
SPAC6C3.07	0.66	1.58008	0.86	0.000289193	0.0124157	mug68	I	2336034	2337768
SPAC8F11.05c	1.28	2.42839	1.54	3.52744e-07	0.000140084	mug130	I	2860849	2861815
SPAC24C9.15c	1	2	2.89	2.13457e-07	0.000113025	spn5	I	3074267	3075988
SPNCRNA.894	0.73	1.65864	0.45	0.00193944	0.0370302	fmc1-antisense-1	I	3202438	3203222
SPAC8E11.03c	0.66	1.58008	1.25	0.00133301	0.0288093	dmc1	I	3382274	3383404
SPAC16E8.05c	0.81	1.75321	1.05	5.2514e-05	0.00421651	mde1	I	3507198	3508537
SPNCRNA.925	0.73	1.65864	3.18	6.57845e-06	0.00109999	SPAC8C9.04-antisense-1	I	3645889	3649035
SPNCRNA.936	1.04	2.05623	1.32	1.53284e-05	0.00180134	rad50-antisense-1	I	3791897	3793891
SPNCRNA.952	1.41	2.65737	1.37	5.75244e-06	0.00101177	trm5-antisense-1	I	3974635	3976212
SPNCRNA.955	0.85	1.8025	-0.14	0.00200264	0.0374509	SPAC27E2.02-antisense-1	I	4004553	4005632
SPNCRNA.960	0.65	1.56917	0.72	0.00321186	0.0494144	SPAC26H5.04-antisense-1	I	4123495	4124888
SPNCRNA.971	0.61	1.52626	2.87	5.51739e-05	0.0042635	SPAC694.03-antisense-1	I	4205572	4206759
SPAC25G10.04c	0.62	1.53688	5.05	1.66356e-06	0.000556329	rec10	I	4301367	4303885
SPNCRNA.1006	1.28	2.42839	0.77	2.59168e-06	0.000686148	dhc1-antisense-1	I	4625840	4627501
SPNCRNA.1026	1.18	2.26577	2.28	8.90064e-08	9.74248e-05	fus1-antisense-1	I	4814239	4817443
SPNCRNA.1028	0.6	1.51572	1.25	0.000310908	0.0129968	SPAC4F10.05c-antisense-1	I	4837762	4838650
SPNCRNA.1319	0.9	1.86607	2.06	5.89163e-06	0.00101177	SPNCRNA.1319	II	157362	158316
SPNCRNA.1328	0.83	1.77769	1.29	0.00075684	0.0215648	SPBC660.08-antisense-1	II	210126	211344
SPNCRNA.1337	0.92	1.89212	3.41	5.26807e-06	0.00101177	omh4-antisense-1	II	297389	299135
SPNCRNA.66	0.91	1.87905	-0.92	0.00206284	0.038133	prl66	II	547325	547761
SPNCRNA.1373	0.77	1.70527	0.21	0.000559706	0.0177819	SPBC839.03c-antisense-1	II	599413	600456
SPNCRNA.1397	0.96	1.94531	2.89	3.36136e-06	0.000821464	mcp5-antisense-1	II	897892	901405
SPNCRNA.1403	0.87	1.82766	0.78	0.000269347	0.0120989	SPBC146.02-antisense-1	II	1000805	1001832
SPBC725.06c	0.65	1.56917	3.29	4.5602e-05	0.00376306	ppk31	II	1212690	1216671
SPNCRNA.1422	0.9	1.86607	-0.35	0.000485362	0.0164042	SPBC651.02-antisense-1	II	1240147	1241248
SPNCRNA.15	1.66	3.16017	-0.43	5.70397e-05	0.0042635	prl15	II	1329046	1329760
SPNCRNA.1454	0.88	1.84038	2.26	9.13759e-06	0.00131955	SPBC19C2.10-antisense-1	II	1695093	1696776
SPNCRNA.1520	0.85	1.8025	2.48	1.29336e-05	0.00167715	pim1-antisense-1	II	2488718	2491866
SPNCRNA.1528	0.85	1.8025	1.26	3.45302e-05	0.00304729	tri1-antisense-1	II	2555739	2556917
SPNCRNA.1564	0.97	1.95884	0.52	0.000764515	0.0216299	SPBC1703.11-antisense-1	II	2934727	2935979
SPNCRNA.1573	0.97	1.95884	1.29	1.61189e-05	0.00180134	SPBC15D4.05-antisense-1	II	3020526	3022271
SPNCRNA.1577	0.81	1.75321	1.53	2.66136e-05	0.00260433	taf73-antisense-1	II	3034427	3035817
SPBC4C3.08	0.83	1.77769	3.06	1.97799e-06	0.000598483	mug136	II	3120771	3122439
SPNCRNA.1628	0.65	1.56917	1.46	0.000217763	0.010895	ppm1-antisense-1	II	3645288	3647532
SPNCRNA.1636	0.75	1.68179	2.84	4.35993e-06	0.000976561	SPBC31F10.02-antisense-1	II	3755596	3756574
SPNCRNA.1640	0.88	1.84038	1.31	0.000129788	0.00749703	vps13a-antisense-1	II	3789314	3791261
SPNCRNA.1641	0.71	1.6358	1.12	0.00049895	0.0165238	vps13a-antisense-2	II	3792303	3793962
SPNCRNA.1667	0.77	1.70527	1.48	0.000300295	0.0127205	SPBC56F2.07c-antisense-1	II	4099940	4103093
SPNCRNA.1680	0.94	1.91853	0.71	6.86453e-05	0.0048578	rtt109-antisense-1	II	4213720	4215008
SPBCPT2R1.08c	3.37	10.3388	2.28	7.80444e-11	2.47947e-07	tlh2	II	4526885	4532899
SPNCRNA.1136	0.94	1.91853	1.97	1.61594e-05	0.00180134	ggc1-antisense-2	III	389072	389926
SPNCRNA.1140	0.75	1.68179	1.82	0.000421665	0.015398	aphl-antisense-1	III	468550	470462
SPNCRNA.1179	0.64	1.55833	1.75	0.000624159	0.0189756	atd3-antisense-1	III	1204934	1206655
SPNCRNA.1182	1.17	2.25012	0.75	0.000186252	0.00982978	SPNCRNA.1182	III	1263755	1264380
SPNCRNA.1183	0.77	1.70527	1.94	0.000172943	0.00931254	SPCC23B6.02c-antisense-1	III	1267979	1268560
SPCC188.12	0.9	1.86607	4.4	2.89243e-07	0.000122523	spn6	III	1504862	1506851
SPCC584.02	1.4	2.63902	-1.57	0.000148979	0.0083036	cuf2	III	1532126	1532753
SPNCRNA.1210	0.81	1.75321	0.58	0.000188693	0.00982978	SPCC777.03c-antisense-1	III	1601457	1602924
SPCC777.04	0.64	1.55833	1.61	0.000455748	0.0158242	SPCC777.04	III	1602954	1604750
SPNCRNA.1211	0.81	1.75321	1.73	7.91765e-05	0.00546834	SPCC777.06c-antisense-1	III	1606589	1608068
SPNCRNA.517	0.71	1.6358	1.07	0.000431133	0.0155551	SPNCRNA.517	III	2289566	2290607
SPCC965.14c	0.94	1.91853	3.05	2.07293e-06	0.000598701	SPCC965.14c	III	2314517	2315434
SPNCRNA.1294	0.93	1.90528	2.32	1.12768e-05	0.00155767	SPCC1827.07c-antisense-1	III	2388207	2389852
SPMITTRNAILE.01	0.62	1.53688	1.26	0.00152876	0.0319532	SPMITTRNAILE.01	MT	16662	16734
SPMITTRNATYR.01	0.62	1.53688	4.43	0.00103502	0.0256719	SPMITTRNATYR.01	MT	17257	17342
FDR5%, FC>1.5

## Sheet: triple copy_down in G34K vs WT
geneID	log2FC	FC	log2AveExpr	P.Value	FDR	Gene.name	chr	start	end
SPBC460.04c	-1.11	-2.15846	3.42	1.48187e-07	9.74248e-05	SPBC460.04c	AB325691	14073	15248
SPBC460.05	-1.15	-2.21914	6.04	4.60201e-06	0.000976561	SPBC460.05	AB325691	16470	18062
SPAC1F8.01	-0.6	-1.51572	2.81	0.000129334	0.00749703	ght3	I	82746	84786
SPAC1F8.02c	-2.55	-5.85634	-1.08	0.000729494	0.0209738	shu1	I	85566	86324
SPAC1F8.03c	-1.1	-2.14355	6.9	0.00023888	0.0114988	str3	I	88201	90300
SPAC11D3.01c	-0.96	-1.94531	4.63	0.000167085	0.00907401	SPAC11D3.01c	I	108732	109195
SPNCRNA.432	-0.93	-1.90528	-1.29	0.00293616	0.0469934	SPNCRNA.432	I	1237146	1238641
SPAC343.12	-1.5	-2.82843	5.09	4.6693e-06	0.000976561	rds1	I	1667671	1669666
SPAC1002.19	-0.66	-1.58008	5.47	1.77639e-06	0.00056436	urg1	I	1835270	1837060
SPNCRNA.779	-0.74	-1.67018	1.71	0.000102972	0.00636819	SPNCRNA.779	I	1953735	1954811
SPAC23C11.06c	-0.62	-1.53688	4.85	0.000324755	0.0131755	SPAC23C11.06c	I	2141632	2143598
SPAC22H10.13	-0.99	-1.98618	4.42	1.40114e-05	0.00178056	zym1	I	2381690	2382200
SPAC19A8.16	-0.65	-1.56917	2.67	0.000345509	0.0133253	prl65	I	2472433	2472961
SPAC23H3.15c	-1.24	-2.36199	5.72	0.00049335	0.0164986	SPAC23H3.15c	I	2523372	2524734
SPAPB1A11.03	-1.66	-3.16017	4.22	2.32819e-05	0.00234815	SPAPB1A11.03	I	2984439	2986118
SPAC3G9.11c	-0.62	-1.53688	9.28	0.00107913	0.0260169	SPAC3G9.11c	I	3159753	3162245
SPAC6G10.12c	-0.67	-1.59107	4.78	0.00213381	0.0388271	ace2	I	3239232	3241177
SPNCRNA.935	-0.75	-1.68179	6.1	0.00025591	0.0119563	SPNCRNA.935	I	3745778	3748833
SPAC4H3.03c	-0.83	-1.77769	4.21	3.94012e-05	0.00333807	SPAC4H3.03c	I	3826456	3829377
SPAPB15E9.02c	-0.69	-1.61328	4.02	0.00222677	0.0400819	SPAPB15E9.02c	I	3991830	3994099
SPAC1F7.07c	-0.92	-1.89212	8.04	0.000102051	0.00636819	fip1	I	4232998	4234760
SPAC1F7.08	-0.87	-1.82766	9.25	2.7395e-05	0.00260433	fio1	I	4235080	4237874
SPAC637.03	-0.59	-1.50525	5.25	0.000225228	0.0110432	SPAC637.03	I	4542091	4543533
SPNCRNA.253	-0.74	-1.67018	2.88	0.00137075	0.0295246	SPNCRNA.253	I	4787154	4787928
SPAC4F10.17	-0.69	-1.61328	2.05	0.00238338	0.0421839	SPAC4F10.17	I	4868326	4869283
SPAC869.09	-1.92	-3.78423	0.5	5.79018e-06	0.00101177	SPAC869.09	I	5496844	5497448
SPAC869.08	-1.69	-3.22657	-0.99	0.000824945	0.0226352	pcm2	I	5497918	5499280
SPAC869.07c	-1.91	-3.75809	0.05	5.7332e-06	0.00101177	mel1	I	5499768	5501236
SPAC869.06c	-1.57	-2.96905	-0.58	2.32386e-05	0.00234815	SPAC869.06c	I	5502560	5503291
SPAC186.08c	-2.22	-4.65893	-0.52	0.000139262	0.00797184	SPAC186.08c	I	5548884	5550012
SPAC750.01	-0.7	-1.6245	2.52	0.000401244	0.0149395	SPAC750.01	I	5555716	5556768
SPBPB8B6.04c	-1.26	-2.39496	0.02	5.77056e-05	0.0042635	grt1	II	47369	51220
SPBPB21E7.01c	-1.99	-3.97237	2.39	2.79965e-07	0.000122523	eno102	II	58136	59704
SPBPB21E7.11	-0.69	-1.61328	1.5	0.000541833	0.0173716	SPBPB21E7.11	II	61526	63086
SPBPB21E7.04c	-1.28	-2.42839	3.71	3.35942e-05	0.00304729	SPBPB21E7.04c	II	64487	65620
SPNCRNA.1304	-1.21	-2.31338	-2.36	0.00275297	0.045317	SPNCRNA.1304	II	65390	66274
SPBPB10D8.01	-1.18	-2.26577	5.26	2.59939e-07	0.000122523	SPBPB10D8.01	II	80899	83357
SPBPB10D8.02c	-1.77	-3.41054	3.78	1.19358e-07	9.74248e-05	SPBPB10D8.02c	II	83229	85631
SPNCRNA.1307	-1.07	-2.09943	2.43	7.40212e-06	0.00120598	SPBPB10D8.02c-antisense-1	II	83799	85528
SPBPB10D8.03	-2.08	-4.22807	-0.26	1.59405e-05	0.00180134	SPBPB10D8.03	II	87727	89029
SPBC359.02	-1.35	-2.54912	4.21	1.90884e-07	0.000110262	alr2	II	107583	109353
SPBC359.04c	-0.6	-1.51572	2.92	7.74628e-05	0.00540878	pfl7	II	117892	121286
SPBC359.05	-0.6	-1.51572	7.74	0.000232954	0.0112992	abc3	II	122657	127461
SPBC359.06	-0.76	-1.69349	5.52	2.18591e-06	0.000603881	mug14	II	128660	129742
SPBC1683.09c	-1.52	-2.86791	3.96	1.55396e-05	0.00180134	frp1	II	160357	162497
SPNCRNA.1366	-0.74	-1.67018	1.15	0.00280832	0.0455928	SPNCRNA.1366	II	520406	522725
SPBC1685.17	-0.68	-1.60214	3.18	5.41549e-05	0.00424815	SPBC1685.17	II	522603	523313
SPBC1685.13	-0.91	-1.87905	6.65	0.000584109	0.0182829	fhn1	II	525509	528544
SPBC839.06	-1.15	-2.21914	5.22	0.000544059	0.0173716	cta3	II	607214	611989
SPBC947.05c	-0.72	-1.64718	2.91	0.000783491	0.0220279	frp2	II	667125	668819
SPBC16E9.16c	-1.36	-2.56685	6.35	9.09331e-05	0.00595659	lsd90	II	1947985	1950255
SPBC24C6.09c	-1.33	-2.51403	2.69	8.1084e-05	0.00553987	SPBC24C6.09c	II	2335176	2337787
SPNCRNA.397	-0.96	-1.94531	2.21	0.00115227	0.0264956	SPNCRNA.397	II	2472439	2472537
SPBC12C2.03c	-0.73	-1.65864	6.85	0.000364013	0.013686	SPBC12C2.03c	II	2473006	2475652
SPBC4F6.09	-0.77	-1.70527	7.77	2.8242e-05	0.00263897	str1	II	2704645	2707648
SPBC13A2.04c	-0.72	-1.64718	6.06	0.000918316	0.0242115	ptr2	II	3405575	3408492
SPNCRNA.421	-1.15	-2.21914	-1.91	0.00165096	0.0336225	SPNCRNA.421	II	3512862	3513996
SPNCRNA.1674	-2.09	-4.25748	-2.62	3.44326e-05	0.00304729	SPNCRNA.1674	II	4129574	4130925
SPBTRNAASN.04	-1.18	-2.26577	-2.07	0.00277871	0.0454662	SPBTRNAASN.04	II	4210053	4210126
SPBC1289.14	-1.39	-2.62079	5.32	3.90563e-06	0.000919125	SPBC1289.14	II	4412072	4413599
SPBP4G3.03	-1.36	-2.56685	1.7	4.68651e-07	0.000175165	fub2	II	4453054	4454161
SPBPB2B2.01	-1.54	-2.90795	4.25	1.48804e-07	9.74248e-05	SPBPB2B2.01	II	4457661	4459842
SPBPB2B2.02	-0.7	-1.6245	2.55	0.000448735	0.0158242	mug180	II	4460486	4462134
SPBPB2B2.05	-0.71	-1.6358	3.64	8.92405e-06	0.00131955	SPBPB2B2.05	II	4466517	4467612
SPBCPT2R1.07c	-2.38	-5.20537	-3.39	0.000825238	0.0226352	SPBCPT2R1.07c	II	4523274	4524970
SPCC1235.18	-0.59	-1.50525	1.36	0.00247173	0.0428244	SPCC1235.18	III	209921	211648
SPCC338.18	-0.7	-1.6245	1.92	0.000842795	0.0229834	SPCC338.18	III	1340628	1341847
SPCC1223.03c	-0.64	-1.55833	4.15	0.000859325	0.0232347	gut2	III	1840594	1843300
SPCC569.03	-0.65	-1.56917	4.36	0.00234394	0.0418354	SPCC569.03	III	2429987	2431575
FDR5%, FC>1.5

## Sheet: triple copy_up in G34R vs WT
geneID	log2FC	FC	log2AveExpr	P.Value	FDR	Gene.name	chr	start	end
SPAC212.12	0.69	1.61328	4.29	0.000453205	0.0382063	SPAC212.12	I	15855	16226
SPAC22F3.02	0.68	1.60214	3.01	3.83662e-05	0.00970604	atf31	I	705042	708014
SPAC139.05	0.85	1.8025	1.38	0.000161359	0.0233591	SPAC139.05	I	1027811	1029993
SPAPB17E12.09	0.92	1.89212	-0.21	0.000454561	0.0382063	SPAPB17E12.09	I	1280537	1281411
SPAC22H10.13	0.78	1.71713	4.42	0.00015904	0.0233591	zym1	I	2381690	2382200
SPAC8F11.05c	1.33	2.51403	1.54	7.83707e-07	0.000711382	mug130	I	2860849	2861815
SPAC24C9.15c	0.72	1.64718	2.89	1.09131e-05	0.0046228	spn5	I	3074267	3075988
SPNCRNA.888	0.8	1.7411	1.96	0.000157251	0.0233591	end4-antisense-1	I	3137359	3138684
SPNCRNA.889	0.61	1.52626	2.61	0.000589173	0.042063	SPAC688.12c-antisense-1	I	3138602	3139458
SPAC16E8.05c	0.69	1.61328	1.05	0.000529465	0.0405327	mde1	I	3507198	3508537
SPAC4H3.03c	0.92	1.89212	4.21	3.47107e-05	0.00958921	SPAC4H3.03c	I	3826456	3829377
SPNCRNA.971	0.63	1.54756	2.87	0.000148912	0.0233591	SPAC694.03-antisense-1	I	4205572	4206759
SPAC27D7.09c	0.62	1.53688	2.2	0.000647126	0.0445848	SPAC27D7.09c	I	4523298	4524731
SPAC637.03	0.62	1.53688	5.25	0.000361091	0.0332517	SPAC637.03	I	4542091	4543533
SPBC1271.09	0.62	1.53688	6.85	0.000175686	0.0233591	tgp1	II	350692	352369
SPNCRNA.1397	1.03	2.04202	2.89	5.79615e-06	0.00302591	mcp5-antisense-1	II	897892	901405
SPNCRNA.1557	0.98	1.97247	2.14	4.18871e-05	0.00985742	lid2-antisense-1	II	2866328	2868277
SPBC4C3.08	0.69	1.61328	3.06	2.70276e-05	0.00817779	mug136	II	3120771	3122439
SPBP8B7.32	0.71	1.6358	6.97	1.15489e-06	0.000832291	SPBP8B7.32	II	3629876	3634113
SPBC215.11c	0.59	1.50525	5.16	1.43264e-05	0.00535471	SPBC215.11c	II	4050360	4051532
SPBC1289.14	0.89	1.85318	5.32	0.000189426	0.0236003	SPBC1289.14	II	4412072	4413599
SPNCRNA.1179	0.94	1.91853	1.75	0.000110358	0.0226198	atd3-antisense-1	III	1204934	1206655
SPCC777.04	0.78	1.71713	1.61	0.000357797	0.0332517	SPCC777.04	III	1602954	1604750
SPNCRNA.1276	0.95	1.93187	3.31	6.35407e-06	0.00302591	brl1-antisense-1	III	2239857	2242131
FDR5%, FC>1.5

## Sheet: triple copy_down in G34R vs WT
geneID	log2FC	FC	log2AveExpr	P.Value	FDR	Gene.name	chr	start	end
SPAC1002.16c	-0.6	-1.51572	4.95	0.00028439	0.0303308	SPAC1002.16c	I	1827612	1829708
SPAC1002.19	-0.83	-1.77769	5.47	1.17888e-06	0.000832291	urg1	I	1835270	1837060
SPAPB1A10.14	-1.28	-2.42839	4.17	0.000130844	0.0233591	pof15	I	1890529	1892090
SPAC2E1P3.04	-0.8	-1.7411	7.97	4.8759e-07	0.000516358	cao1	I	2931763	2935115
SPAC2E1P3.05c	-0.99	-1.98618	5.48	0.000136749	0.0233591	SPAC2E1P3.05c	I	2935116	2937079
SPNCRNA.861	-0.95	-1.93187	3.72	3.80279e-06	0.00219663	SPNCRNA.861	I	2937952	2939052
SPNCRNA.862	-1.2	-2.2974	4.98	1.25451e-07	0.000202161	SPNCRNA.862	I	2938121	2939967
SPNCRNA.863	-1.25	-2.37841	8.2	2.73331e-08	8.68373e-05	SPNCRNA.863	I	2939138	2940765
SPAPB24D3.03	-0.6	-1.51572	5.02	3.97163e-05	0.00970604	SPAPB24D3.03	I	2952226	2953762
SPNCRNA.935	-1.31	-2.47942	6.1	1.77238e-05	0.00625651	SPNCRNA.935	I	3745778	3748833
SPAC4F10.17	-1.07	-2.09943	2.05	0.000619624	0.0437454	SPAC4F10.17	I	4868326	4869283
SPAC1039.09	-0.93	-1.90528	3.52	1.34218e-05	0.00533015	isp5	I	5465377	5468649
SPAC869.09	-1.62	-3.07375	0.5	7.47113e-05	0.0169541	SPAC869.09	I	5496844	5497448
SPAC869.06c	-2.02	-4.05584	-0.58	1.95352e-05	0.00653298	SPAC869.06c	I	5502560	5503291
SPAC186.02c	-3.46	-11.0043	-2.21	0.000269288	0.0303308	SPAC186.02c	I	5529851	5531144
SPAC750.05c	-1.63	-3.09513	1.04	6.6671e-06	0.00302591	SPAC750.05c	I	5565881	5567337
SPAC750.06c	-2.04	-4.11246	-0.63	0.000178727	0.0233591	SPAC750.06c	I	5568903	5569803
SPBPB8B6.04c	-1.11	-2.15846	0.02	0.000491855	0.0382063	grt1	II	47369	51220
SPBPB21E7.11	-0.9	-1.86607	1.5	0.000317886	0.0312277	SPBPB21E7.11	II	61526	63086
SPNCRNA.291	-0.83	-1.77769	2.89	3.74764e-05	0.00970604	SPNCRNA.291	II	103165	104528
SPBC359.02	-2.34	-5.06303	4.21	1.81194e-08	8.68373e-05	alr2	II	107583	109353
SPBC359.06	-0.95	-1.93187	5.52	1.68785e-06	0.00107246	mug14	II	128660	129742
SPNCRNA.1343	-0.75	-1.68179	3.92	0.000171818	0.0233591	SPNCRNA.1343	II	354031	355573
SPBC2G2.17c	-0.89	-1.85318	2.79	0.000342904	0.0330123	SPBC2G2.17c	II	3466270	3467797
SPNCRNA.1669	-0.66	-1.58008	1.53	0.000744363	0.0482621	SPNCRNA.1669	II	4107562	4109819
SPBCPT2R1.08c	-2.84	-7.1602	2.28	1.27265e-07	0.000202161	tlh2	II	4526885	4532899
SPCC1235.18	-1.05	-2.07053	1.36	0.00017968	0.0233591	SPCC1235.18	III	209921	211648
SPCC1235.14	-1.15	-2.21914	7.91	0.000262253	0.0303308	ght5	III	212160	214376
SPCC1393.10	-1.03	-2.04202	6.58	0.000144198	0.0233591	ctr4	III	818302	819361
SPCC1494.11c	-4.62	-24.59	1.01	1.98859e-07	0.00025271	Tf2-13	III	2320320	2324320
FDR 5% FC>1.5 fold

## Sheet: triple copy G34R vs wt p=0.05
geneID	log2FC	log2AveExpr	P.Value	FDR	Gene.name	chr	start	end
SPBC359.02	-2.34	4.21	1.81194e-08	8.68373e-05	alr2	II	107583	109353
SPNCRNA.863	-1.25	8.2	2.73331e-08	8.68373e-05	SPNCRNA.863	I	2939138	2940765
SPBCPT2R1.08c	-2.84	2.28	1.27265e-07	0.000202161	tlh2	II	4526885	4532899
SPNCRNA.862	-1.2	4.98	1.25451e-07	0.000202161	SPNCRNA.862	I	2938121	2939967
SPCC1494.11c	-4.62	1.01	1.98859e-07	0.00025271	Tf2-13	III	2320320	2324320
SPAC2E1P3.04	-0.8	7.97	4.8759e-07	0.000516358	cao1	I	2931763	2935115
SPAC8F11.05c	1.33	1.54	7.83707e-07	0.000711382	mug130	I	2860849	2861815
SPAC1002.19	-0.83	5.47	1.17888e-06	0.000832291	urg1	I	1835270	1837060
SPBP8B7.32	0.71	6.97	1.15489e-06	0.000832291	SPBP8B7.32	II	3629876	3634113
SPBC359.06	-0.95	5.52	1.68785e-06	0.00107246	mug14	II	128660	129742
SPNCRNA.861	-0.95	3.72	3.80279e-06	0.00219663	SPNCRNA.861	I	2937952	2939052
SPAC750.05c	-1.63	1.04	6.6671e-06	0.00302591	SPAC750.05c	I	5565881	5567337
SPNCRNA.1276	0.95	3.31	6.35407e-06	0.00302591	brl1-antisense-1	III	2239857	2242131
SPNCRNA.1397	1.03	2.89	5.79615e-06	0.00302591	mcp5-antisense-1	II	897892	901405
SPAC24C9.15c	0.72	2.89	1.09131e-05	0.0046228	spn5	I	3074267	3075988
SPAC1039.09	-0.93	3.52	1.34218e-05	0.00533015	isp5	I	5465377	5468649
SPBC215.11c	0.59	5.16	1.43264e-05	0.00535471	SPBC215.11c	II	4050360	4051532
SPNCRNA.935	-1.31	6.1	1.77238e-05	0.00625651	SPNCRNA.935	I	3745778	3748833
SPAC869.06c	-2.02	-0.58	1.95352e-05	0.00653298	SPAC869.06c	I	5502560	5503291
SPAC1565.01	0.45	8.04	2.44255e-05	0.00775998	rcf2	I	1290931	1293853
SPBC4C3.08	0.69	3.06	2.70276e-05	0.00817779	mug136	II	3120771	3122439
SPCC4F11.04c	0.5	4.92	2.95634e-05	0.00853844	imt2	III	2007921	2010840
SPAC4H3.03c	0.92	4.21	3.47107e-05	0.00958921	SPAC4H3.03c	I	3826456	3829377
SPAC22F3.02	0.68	3.01	3.83662e-05	0.00970604	atf31	I	705042	708014
SPAPB24D3.03	-0.6	5.02	3.97163e-05	0.00970604	SPAPB24D3.03	I	2952226	2953762
SPNCRNA.291	-0.83	2.89	3.74764e-05	0.00970604	SPNCRNA.291	II	103165	104528
SPNCRNA.1557	0.98	2.14	4.18871e-05	0.00985742	lid2-antisense-1	II	2866328	2868277
SPAC869.09	-1.62	0.5	7.47113e-05	0.0169541	SPAC869.09	I	5496844	5497448
SPAC20G4.03c	0.42	5.42	8.97593e-05	0.0196666	hri1	I	4818012	4820749
SPAC23G3.03	0.44	5.62	0.000101984	0.0216003	sib2	I	870740	872773
SPNCRNA.1179	0.94	1.75	0.000110358	0.0226198	atd3-antisense-1	III	1204934	1206655
SPAC1F7.12	0.4	6.91	0.000118856	0.0228851	yak3	I	4248777	4250231
SPCC569.07	-0.51	5.4	0.000115834	0.0228851	SPCC569.07	III	2414916	2417388
SPAC139.05	0.85	1.38	0.000161359	0.0233591	SPAC139.05	I	1027811	1029993
SPAC22H10.13	0.78	4.42	0.00015904	0.0233591	zym1	I	2381690	2382200
SPAC25G10.04c	0.4	5.05	0.000156406	0.0233591	rec10	I	4301367	4303885
SPAC2E1P3.05c	-0.99	5.48	0.000136749	0.0233591	SPAC2E1P3.05c	I	2935116	2937079
SPAC4G9.22	0.44	7.66	0.000150092	0.0233591	SPAC4G9.22	I	2291666	2292778
SPAC750.06c	-2.04	-0.63	0.000178727	0.0233591	SPAC750.06c	I	5568903	5569803
SPAPB1A10.14	-1.28	4.17	0.000130844	0.0233591	pof15	I	1890529	1892090
SPBC1271.09	0.62	6.85	0.000175686	0.0233591	tgp1	II	350692	352369
SPBC1683.08	-0.39	4.73	0.000166402	0.0233591	ght4	II	155751	159570
SPBP4H10.12	0.31	6.05	0.000157353	0.0233591	SPBP4H10.12	II	2895855	2896587
SPCC1235.18	-1.05	1.36	0.00017968	0.0233591	SPCC1235.18	III	209921	211648
SPCC1393.10	-1.03	6.58	0.000144198	0.0233591	ctr4	III	818302	819361
SPCC188.12	0.47	4.4	0.000180138	0.0233591	spn6	III	1504862	1506851
SPNCRNA.1343	-0.75	3.92	0.000171818	0.0233591	SPNCRNA.1343	II	354031	355573
SPNCRNA.888	0.8	1.96	0.000157251	0.0233591	end4-antisense-1	I	3137359	3138684
SPNCRNA.971	0.63	2.87	0.000148912	0.0233591	SPAC694.03-antisense-1	I	4205572	4206759
SPCC338.11c	-0.34	5.61	0.000185593	0.0235851	rrg1	III	1356162	1357371
SPBC1289.14	0.89	5.32	0.000189426	0.0236003	SPBC1289.14	II	4412072	4413599
SPAC1F8.06	-0.37	4.25	0.00022789	0.027321	fta5	I	99871	101431
SPAC3G6.05	-0.5	7.58	0.000223936	0.027321	SPAC3G6.05	I	5387884	5389677
SPAC1002.16c	-0.6	4.95	0.00028439	0.0303308	SPAC1002.16c	I	1827612	1829708
SPAC186.02c	-3.46	-2.21	0.000269288	0.0303308	SPAC186.02c	I	5529851	5531144
SPAC1F8.08	0.36	4.59	0.000285517	0.0303308	SPAC1F8.08	I	103941	104953
SPBC725.10	0.55	6.31	0.00028641	0.0303308	SPBC725.10	II	1224480	1226219
SPBP8B7.24c	0.3	5.71	0.000276226	0.0303308	atg8	II	3684281	3685459
SPCC1235.14	-1.15	7.91	0.000262253	0.0303308	ght5	III	212160	214376
SPNCRNA.1096	-0.36	4.85	0.000285501	0.0303308	SPCC1884.01-antisense-1	III	37658	39319
SPAC13C5.03	-0.44	5.27	0.000319452	0.0312277	tht1	I	427350	430121
SPAC922.07c	-0.32	5.16	0.000313478	0.0312277	atd2	I	5486848	5488830
SPBC12C2.04	0.5	7.44	0.00031719	0.0312277	SPBC12C2.04	II	2468858	2470506
SPBPB21E7.11	-0.9	1.5	0.000317886	0.0312277	SPBPB21E7.11	II	61526	63086
SPCC965.14c	0.58	3.05	0.000302645	0.0312277	SPCC965.14c	III	2314517	2315434
SPBC2G2.17c	-0.89	2.79	0.000342904	0.0330123	SPBC2G2.17c	II	3466270	3467797
SPAC637.03	0.62	5.25	0.000361091	0.0332517	SPAC637.03	I	4542091	4543533
SPBC1289.16c	0.58	5.02	0.000359954	0.0332517	cao2	II	4426157	4428785
SPCC777.04	0.78	1.61	0.000357797	0.0332517	SPCC777.04	III	1602954	1604750
SPBC1711.05	-0.22	7.85	0.000378925	0.0337188	SPBC1711.05	II	2141222	2142836
SPBC2A9.02	0.37	7.24	0.000373808	0.0337188	SPBC2A9.02	II	2948202	2950388
SPNCRNA.668	-0.52	2.49	0.000382083	0.0337188	mug161-antisense-1	I	632595	633291
SPNCRNA.1255	0.57	4.65	0.000421862	0.0367193	SPNCRNA.1255	III	2022833	2023261
SPAC212.12	0.69	4.29	0.000453205	0.0382063	SPAC212.12	I	15855	16226
SPAC5H10.08c	0.24	5.9	0.000493062	0.0382063	pan6	I	159880	160945
SPAPB17E12.09	0.92	-0.21	0.000454561	0.0382063	SPAPB17E12.09	I	1280537	1281411
SPBPB8B6.04c	-1.11	0.02	0.000491855	0.0382063	grt1	II	47369	51220
SPCC162.11c	-0.27	5.7	0.000466946	0.0382063	SPCC162.11c	III	1556001	1557913
SPNCRNA.1368	-0.53	2.9	0.000480129	0.0382063	rhp14-antisense-1	II	536739	539154
SPNCRNA.1665	0.49	3.91	0.00048944	0.0382063	cdc23-antisense-1	II	4079082	4082041
SPNCRNA.605	-0.33	4.85	0.000484901	0.0382063	SPAC1F8.04c-antisense-1	I	90949	94038
SPNCRNA.679	-0.49	3.76	0.000472875	0.0382063	SPNCRNA.679	I	762720	764810
SPAC16E8.05c	0.69	1.05	0.000529465	0.0405327	mde1	I	3507198	3508537
SPAC27F1.06c	-0.28	7.2	0.000548636	0.0405863	SPAC27F1.06c	I	4327147	4328451
SPBC336.05c	0.42	3.17	0.000544825	0.0405863	SPBC336.05c	II	2745480	2748552
SPCC18.12c	-0.33	6.34	0.000549326	0.0405863	utp23	III	1977107	1978642
SPAC1002.17c	-0.46	5.33	0.000587241	0.042063	urg2	I	1830609	1831951
SPBC23E6.03c	0.35	4.53	0.000575939	0.042063	nta1	II	3839653	3844097
SPNCRNA.889	0.61	2.61	0.000589173	0.042063	SPAC688.12c-antisense-1	I	3138602	3139458
SPAC4F10.17	-1.07	2.05	0.000619624	0.0437454	SPAC4F10.17	I	4868326	4869283
SPNCRNA.1457	-0.28	5.31	0.00063531	0.04436	atf21-antisense-1	II	1721083	1724641
SPAC27D7.09c	0.62	2.2	0.000647126	0.0445848	SPAC27D7.09c	I	4523298	4524731
SPBC14F5.13c	0.24	8.43	0.000652563	0.0445848	pho8	II	4182551	4184659
SPCC1223.02	0.36	13.92	0.000663281	0.044835	nmt1	III	1838413	1839664
SPBC887.17	-0.31	8.75	0.000694139	0.0464269	SPBC887.17	II	3575420	3578114
SPBC215.05	0.49	8.96	0.000730307	0.0479337	gpd1	II	4035580	4037342
SPBC2F12.11c	-0.33	6.13	0.000731755	0.0479337	rep2	II	1717715	1719322
SPNCRNA.1669	-0.66	1.53	0.000744363	0.0482621	SPNCRNA.1669	II	4107562	4109819
SPAC17C9.12	0.25	6.6	0.000803528	0.0500551	scs22	I	4477935	4479970
SPAC21E11.04	-0.46	6.41	0.000799297	0.0500551	aca1	I	4254672	4255695
SPNCRNA.1528	0.64	1.26	0.000800347	0.0500551	tri1-antisense-1	II	2555739	2556917
SPNCRNA.900	0.37	4.67	0.000794218	0.0500551	SPNCRNA.900	I	3300812	3302082
SPAC1B3.16c	-0.39	10.9	0.00082087	0.0506389	vht1	I	4958698	4961033
SPAC1002.12c	0.26	6.86	0.000847607	0.0509875	SPAC1002.12c	I	1818482	1820420
SPAC1039.01	-0.49	4.14	0.000853503	0.0509875	SPAC1039.01	I	5444360	5447537
SPAC2F7.06c	0.45	3.4	0.000842288	0.0509875	pol4	I	541576	543735
SPBC1685.17	-0.56	3.18	0.000858619	0.0509875	SPBC1685.17	II	522603	523313
SPAP8A3.04c	0.65	10.46	0.000897967	0.0524875	hsp9	I	5319957	5320676
SPCC417.16	-0.29	6.14	0.000900399	0.0524875	SPCC417.16	III	1702785	1703501
SPAC513.04	-0.53	4.71	0.000918809	0.0530738	SPAC513.04	I	2913403	2913705
SPAC11D3.04c	-0.24	6.53	0.000992829	0.053919	SPAC11D3.04c	I	112514	114445
SPAC186.05c	-0.3	5.15	0.000987393	0.053919	SPAC186.05c	I	5540032	5541502
SPAC683.02c	-0.32	6.12	0.000961018	0.053919	SPAC683.02c	I	4197466	4198686
SPCC830.08c	0.24	7.09	0.000975838	0.053919	yop1	III	2195793	2197245
SPCC965.07c	0.37	6.39	0.000988296	0.053919	gst2	III	2294617	2296383
SPNCRNA.1454	0.55	2.26	0.000975808	0.053919	SPBC19C2.10-antisense-1	II	1695093	1696776
SPNCRNA.1573	0.65	1.29	0.000992844	0.053919	SPBC15D4.05-antisense-1	II	3020526	3022271
SPAC1F7.10	0.28	4.08	0.0010314	0.0550704	SPAC1F7.10	I	4243421	4244823
SPBC1683.09c	-0.99	3.96	0.00104871	0.0550704	frp1	II	160357	162497
SPNCRNA.798	-0.42	4.46	0.00104375	0.0550704	SPAC23C11.06c-antisense-1	I	2141671	2143567
SPNCRNA.799	0.62	3.06	0.00103211	0.0550704	ata1-antisense-1	I	2146730	2148425
SPBC106.11c	0.2	5.48	0.00106552	0.0554944	plg7	II	399003	401020
SPBC26H8.06	-0.2	7.95	0.00108601	0.0561019	grx4	II	3957094	3958479
SPCC1672.12c	0.19	6.72	0.00110592	0.0566694	get4	III	590070	591747
SPNCRNA.930	0.48	3.1	0.00111762	0.0568107	SPNCRNA.930	I	3711920	3716625
SPAC1635.01	0.27	9.19	0.00114181	0.0575798	SPAC1635.01	I	4648900	4650466
SPAC20G8.04c	-0.27	8.3	0.0011678	0.0579704	cir2	I	1395770	1398272
SPBP19A11.01	0.25	8.96	0.00115891	0.0579704	gcv3	II	2848335	2849481
SPAC4F10.20	0.39	8.1	0.00121205	0.0583435	grx1	I	4874165	4875051
SPAC9E9.11	0.34	7.92	0.00119768	0.0583435	plr1	I	4461697	4462901
SPBC365.12c	0.47	6.42	0.00119326	0.0583435	ish1	II	2516125	2518792
SPNCRNA.1307	-0.62	2.43	0.00121058	0.0583435	SPBPB10D8.02c-antisense-1	II	83799	85528
SPAC22A12.08c	0.28	7.99	0.00123917	0.058961	SPAC22A12.08c	I	1170196	1172171
SPBC1347.11	0.4	8.34	0.00124343	0.058961	sro1	II	4081869	4083198
SPAC328.03	0.59	8.59	0.00130478	0.0605149	tps1	I	3479098	3481305
SPBC24C6.09c	0.93	2.69	0.00129253	0.0605149	SPBC24C6.09c	II	2335176	2337787
SPBC359.04c	-0.47	2.92	0.00130225	0.0605149	pfl7	II	117892	121286
SPCC330.06c	0.41	8.27	0.00133204	0.0613316	pmp20	III	118222	119002
SPNCRNA.952	0.79	1.37	0.00135256	0.0618284	trm5-antisense-1	I	3974635	3976212
SPAC4C5.03	0.2	6.08	0.0014708	0.0661983	SPAC4C5.03	I	1196723	1198284
SPBC25B2.09c	-0.28	8.89	0.00148242	0.0661983	mrs1	II	2612912	2615280
SPBC418.02	-0.25	5.49	0.00147101	0.0661983	SPBC418.02	II	3584891	3587346
SPNCRNA.178	-0.68	0.73	0.00148983	0.0661983	SPNCRNA.178	I	1844130	1845339
SPAC17A2.05	0.22	7.15	0.00152714	0.0665418	osm1	I	3560508	3562931
SPAC6F12.04	0.25	7.26	0.00153945	0.0665418	tvp15	I	1316008	1316643
SPBC23G7.11	0.78	0.83	0.0015251	0.0665418	mag2	II	2120231	2121050
SPBC31F10.16	0.18	7.74	0.00153192	0.0665418	SPBC31F10.16	II	3785745	3788313
SPBC660.07	0.45	7.53	0.00158198	0.0674833	ntp1	II	206580	209641
SPBPB10D8.03	-1.22	-0.26	0.00158247	0.0674833	SPBPB10D8.03	II	87727	89029
SPAC1039.08	-0.31	3.18	0.00164765	0.0687882	SPAC1039.08	I	5463863	5465172
SPAPB8E5.10	0.49	2.79	0.00167803	0.0687882	SPAPB8E5.10	I	4926480	4928138
SPBC11C11.06c	0.58	6.3	0.00167379	0.0687882	SPBC11C11.06c	II	3359121	3360178
SPBC1539.10	-0.24	6.58	0.00167232	0.0687882	nop16	II	4380239	4381323
SPBC18A7.01	0.23	6.13	0.00165719	0.0687882	SPBC18A7.01	II	2729195	2730774
SPCC830.07c	0.29	6.73	0.00166193	0.0687882	psi1	III	2193527	2195545
SPNCRNA.67	0.76	0.4	0.00169314	0.068963	prl67	III	1431135	1433068
SPACUNK4.17	0.87	4.91	0.0017297	0.0696801	SPACUNK4.17	I	2872778	2874687
SPBC2G5.06c	0.32	8.84	0.00173268	0.0696801	hmt2	II	2589004	2590955
SPNCRNA.1090	0.73	0.41	0.00178523	0.0713417	atd2-antisense-1	I	5487525	5488928
SPBC13A2.04c	-0.77	6.06	0.00181512	0.0716351	ptr2	II	3405575	3408492
SPNCRNA.577	-0.85	2.83	0.00180967	0.0716351	SPBC1652.02-antisense-1	II	4255755	4259164
SPBC1347.01c	0.44	3.46	0.00187847	0.0732258	rev1	II	4061232	4064411
SPBC56F2.06	0.74	5.71	0.00187645	0.0732258	mug147	II	4104214	4106013
SPCC794.12c	0.29	10.39	0.00189792	0.0735328	mae2	III	275261	277340
SPAPB24D3.08c	0.23	6.71	0.00199546	0.0748404	SPAPB24D3.08c	I	2961073	2962670
SPCC1223.08c	-0.24	8.51	0.00197214	0.0748404	dfr1	III	1855307	1857115
SPCC1393.09c	-0.2	6.35	0.00195273	0.0748404	gir2	III	815087	816595
SPCC1442.09	-0.2	8.06	0.00199768	0.0748404	trp3	III	1783641	1785552
SPCC777.03c	0.2	5.02	0.00198465	0.0748404	SPCC777.03c	III	1601266	1604737
SPNCRNA.699	-0.64	2.22	0.00200234	0.0748404	SPNCRNA.699	I	948715	949365
SPAC1142.05	-0.57	6.29	0.00206881	0.0760288	ctr5	I	3635293	3636572
SPAC23H4.05c	-0.54	1.23	0.00207003	0.0760288	SPAC23H4.05c	I	1599323	1600363
SPAC3A12.14	0.25	8.19	0.00205973	0.0760288	cam1	I	1444658	1446333
SPAC8C9.03	0.28	7.68	0.00217656	0.0794818	cgs1	I	3642972	3645636
SPCC965.11c	0.31	5.09	0.00220573	0.079685	agp3	III	2303540	2308275
SPNCRNA.1280	0.41	2.63	0.0022072	0.079685	SPCC965.04c-antisense-1	III	2286843	2289468
SPBC354.12	0.33	8.87	0.00223477	0.0802244	gpd3	II	578063	580056
SPAC10F6.11c	0.23	5.85	0.00242656	0.0806977	atg17	I	1226090	1228894
SPAC14C4.01c	0.24	6.4	0.00242558	0.0806977	SPAC14C4.01c	I	5221803	5226054
SPAC23C4.05c	0.29	7.39	0.00232946	0.0806977	SPAC23C4.05c	I	1036639	1038267
SPAC23C4.06c	0.25	5.75	0.00229159	0.0806977	SPAC23C4.06c	I	1038515	1042027
SPAC29B12.02c	-0.18	7.55	0.00243846	0.0806977	set2	I	5408180	5411132
SPAC343.12	0.66	5.09	0.0024314	0.0806977	rds1	I	1667671	1669666
SPAC4D7.02c	0.45	6.24	0.00232505	0.0806977	pgc1	I	5352099	5353742
SPBC1685.07c	-0.26	4.85	0.00237353	0.0806977	avt5	II	509491	512924
SPBC16E9.16c	0.93	6.35	0.00230729	0.0806977	lsd90	II	1947985	1950255
SPCC550.11	-0.26	8.52	0.00241676	0.0806977	SPCC550.11	III	1207623	1211442
SPCC576.06c	0.23	5.29	0.00238665	0.0806977	SPCC576.06c	III	2092017	2093726
SPCPB16A4.05c	-0.18	6.31	0.00238501	0.0806977	SPCPB16A4.05c	III	952436	954068
SPNCRNA.1136	0.54	1.97	0.0024066	0.0806977	ggc1-antisense-2	III	389072	389926
SPNCRNA.771	0.29	3.27	0.0023935	0.0806977	arb1-antisense-1	I	1899821	1901995
SPNCRNA.904	0.3	4.74	0.00241615	0.0806977	dmc1-antisense-1	I	3382189	3383857
SPAC25B8.18	0.38	2.62	0.00249618	0.0811349	SPAC25B8.18	I	4191410	4192157
SPAC26F1.04c	0.42	6.15	0.00249577	0.0811349	etr1	I	5177808	5179736
SPAC6F12.06	0.21	6.35	0.00250275	0.0811349	SPAC6F12.06	I	1318942	1321136
SPNCRNA.1662	0.33	3.58	0.00250108	0.0811349	rev1-antisense-1	II	4061570	4064564
SPAC18B11.02c	-0.21	5.92	0.0025766	0.0831052	SPAC18B11.02c	I	313974	315335
SPAC1556.01c	0.17	7.26	0.00260154	0.0834858	rad50	I	3791753	3796023
SPCC191.01	0.35	4.99	0.00263056	0.0835729	SPCC191.01	III	1705817	1707734
SPNCRNA.1182	0.92	0.75	0.0026237	0.0835729	SPNCRNA.1182	III	1263755	1264380
SPBC16C6.06	0.18	8.09	0.00264605	0.0836467	vps10	II	4336962	4341614
SPAC1B3.01c	-0.27	6.31	0.00267132	0.0839855	SPAC1B3.01c	I	4925782	4927980
SPBC337.16	0.32	7.77	0.00269642	0.0839855	cho1	II	1058347	1059126
SPCC1281.04	0.73	0.83	0.00268943	0.0839855	SPCC1281.04	III	1386524	1387961
SPAC11D3.15	0.19	6.65	0.00272734	0.0842878	SPAC11D3.15	I	136139	140365
SPAC212.06c	-0.7	-0.32	0.00273265	0.0842878	SPAC212.06c	I	18042	18974
SPAC10F6.16	0.25	7.8	0.00278796	0.0851667	mug134	I	1238896	1240185
SPNCRNA.1316	-0.36	4.17	0.00278296	0.0851667	SPNCRNA.1316	II	145701	148807
SPNCRNA.1353	0.51	2.41	0.0028408	0.0863659	SPBC106.12c-antisense-1	II	400819	401999
SPNCRNA.1121	-1.25	-0.53	0.00289028	0.0874516	SPNCRNA.1121	III	234465	236718
SPBC21B10.08c	0.18	8.06	0.00296095	0.088328	SPBC21B10.08c	II	1655565	1656928
SPBC4F6.16c	0.2	7.7	0.00294335	0.088328	ero11	II	2720540	2722662
SPNCRNA.963	-0.59	0.78	0.00294789	0.088328	SPNCRNA.963	I	4140077	4141041
SPAC1039.02	0.32	8.01	0.00302331	0.0894171	SPAC1039.02	I	5448735	5451642
SPBC23G7.13c	-0.45	4.22	0.0030256	0.0894171	SPBC23G7.13c	II	2123087	2125438
SPAC15A10.05c	0.37	2.8	0.00317947	0.0897882	mug182	I	3685633	3686831
SPAC18G6.01c	0.35	5.53	0.00307437	0.0897882	SPAC18G6.01c	I	2208991	2210790
SPAC25H1.02	0.28	4.46	0.0031563	0.0897882	jmj1	I	2525778	2527510
SPAC3H8.08c	0.2	5.1	0.00305947	0.0897882	SPAC3H8.08c	I	601848	603993
SPAC977.18	-2.03	0.06	0.00308272	0.0897882	SPAC977.18	I	31140	32345
SPCC1840.07c	-0.2	7.2	0.00309734	0.0897882	SPCC1840.07c	III	2270044	2271671
SPCC24B10.18	-0.24	5.78	0.00313017	0.0897882	SPCC24B10.18	III	931924	932847
SPCC663.08c	0.37	3.6	0.00317044	0.0897882	SPCC663.08c	III	1647689	1648808
SPNCRNA.612	0.51	2.07	0.00316113	0.0897882	SPAC5H10.01-antisense-1	I	146871	148041
SPNCRNA.905	0.28	3.29	0.00317404	0.0897882	SPAC8E11.01c-antisense-1	I	3385556	3388141
SPCC594.03	0.51	2.49	0.00320043	0.0899801	SPCC594.03	III	361356	362629
SPNCRNA.887	0.43	3.28	0.00325244	0.0910398	slx4-antisense-1	I	3117041	3119298
SPCC1259.12c	0.22	5.98	0.0033108	0.0922668	gid1	III	1056338	1058386
SPAP7G5.06	-0.42	5.78	0.00334391	0.0923793	per1	I	3748767	3751729
SPBC14C8.06	0.25	8.49	0.0033303	0.0923793	arc1	II	2214396	2215817
SPAC4G8.12c	0.23	5.58	0.00335975	0.0924149	SPAC4G8.12c	I	783822	786724
SPAC56F8.09	-0.27	5.84	0.00338628	0.0927432	rrp8	I	1140580	1142002
SPBC15C4.06c	0.23	4.96	0.00344062	0.093827	SPBC15C4.06c	II	2251411	2253713
SPBC530.07c	-0.29	8.25	0.00347097	0.0939462	SPBC530.07c	II	804139	805686
SPBP8B7.18c	-0.25	8.93	0.00347456	0.0939462	SPBP8B7.18c	II	3667950	3670139
SPAC13G7.06	0.17	7.28	0.00350006	0.0940094	met16	I	2307438	2308878
SPNCRNA.1285	-0.36	3.29	0.00350649	0.0940094	SPNCRNA.1285	III	2308782	2311926
SPAC25B8.09	0.18	5.46	0.00356759	0.0946761	SPAC25B8.09	I	4170550	4171657
SPCC1795.05c	-0.16	6.52	0.00358556	0.0946761	SPCC1795.05c	III	988395	989709
SPNCRNA.1190	0.41	3.99	0.00357223	0.0946761	SPNCRNA.1190	III	1371577	1372674
SPNCRNA.467	-1.17	-2.72	0.00359096	0.0946761	SPNCRNA.467	III	583036	583289
SPAC25B8.13c	-0.53	6.01	0.00369394	0.0961938	isp7	I	4179961	4183074
SPBC11G11.03	-0.18	7.62	0.00367393	0.0961938	mrt4	II	1760715	1762094
SPNCRNA.1080	0.31	3.14	0.00368692	0.0961938	SPNCRNA.1080	I	5413728	5414935
SPAC1006.01	0.25	7.69	0.0037973	0.0972519	psp3	I	5067494	5069371
SPAC1782.12c	0.24	5.61	0.0038387	0.0972519	SPAC1782.12c	I	4773459	4775369
SPBC11C11.09c	-0.32	9.94	0.00379867	0.0972519	rpl502	II	3364710	3365690
SPBC1773.03c	0.24	4.42	0.00378036	0.0972519	SPBC1773.03c	II	285909	288246
SPBC17G9.06c	0.19	7.85	0.00385702	0.0972519	SPBC17G9.06c	II	2179341	2180791
SPBC56F2.09c	-0.32	8.75	0.00382657	0.0972519	arg5	II	4094158	4096292
SPNCRNA.1086	-0.39	2.62	0.00385484	0.0972519	SPAC1039.08-antisense-1	I	5463940	5466070
SPNCRNA.711	0.54	1	0.00377009	0.0972519	rad52-antisense-1	I	1099991	1101663
SPCC364.01	-0.27	5.02	0.00387901	0.09742	cif1	III	484820	486386
SPAC1B9.03c	-0.21	7.14	0.0038947	0.0974289	SPAC1B9.03c	I	2406661	2408084
SPCC1235.11	-0.19	8.28	0.00392834	0.0978849	mpc1	III	200020	201625
SPAC10F6.06	0.34	8.83	0.00414978	0.0979507	vip1	I	1217077	1218228
SPAC14C4.10c	0.29	4.26	0.00398511	0.0979507	SPAC14C4.10c	I	5245900	5247580
SPAC17H9.05	-0.21	8.01	0.00410738	0.0979507	ebp2	I	2012859	2016204
SPAC25G10.03	0.16	8.34	0.00404202	0.0979507	zip1	I	4299757	4301402
SPAC29A4.12c	-2.83	3.68	0.00415213	0.0979507	mug108	I	5124554	5125643
SPAC3C7.14c	0.29	7.87	0.0041024	0.0979507	obr1	I	2094110	2095066
SPAPB8E5.07c	-0.21	8.48	0.00413151	0.0979507	rrp12	I	4919715	4923369
SPBC1685.06	0.54	2.31	0.00400642	0.0979507	cid11	II	509412	511089
SPBC1773.17c	-0.22	5.9	0.00416221	0.0979507	SPBC1773.17c	II	321634	322998
SPBC19F5.02c	-0.23	7.63	0.00413107	0.0979507	utp4	II	3703456	3706300
SPBC2F12.09c	-4.1	1.53	0.0040634	0.0979507	atf21	II	1722231	1724450
SPBC776.05	0.29	5	0.00408206	0.0979507	SPBC776.05	II	3181709	3183754
SPBC8E4.02c	-0.23	6.03	0.00408215	0.0979507	SPBC8E4.02c	II	4442574	4444191
SPNCRNA.1007	0.44	2.25	0.00400813	0.0979507	SPAC30C2.03-antisense-1	I	4636966	4638001
SPNCRNA.1089	-0.82	-1.16	0.00407797	0.0979507	SPNCRNA.1089	I	5478367	5479836
SPBC2F12.05c	0.19	7.78	0.0041818	0.0980486	SPBC2F12.05c	II	1728749	1733339
SPCC794.16	-2.13	0.3	0.00420712	0.0982796	SPCC794.16	III	252472	254092
SPAC26A3.11	0.19	6.29	0.00422601	0.0983591	SPAC26A3.11	I	3356375	3357902
SPNCRNA.728	0.25	4.18	0.0042491	0.0985357	SPAC10F6.15-antisense-1	I	1235569	1238775
SPNCRNA.953	0.24	7.04	0.00428543	0.0990168	SPNCRNA.953	I	3981077	3982894
SPAC13G7.07	0.23	4.33	0.00434063	0.0995681	arb2	I	2308863	2310294
SPNCRNA.1174	0.34	2.05	0.00433581	0.0995681	cwf20-antisense-1	III	1150712	1151843
SPAC15E1.02c	0.59	4.24	0.00446735	0.102106	SPAC15E1.02c	I	3721257	3721816
SPNCRNA.1118	-0.24	5.41	0.00459621	0.104675	ght6-antisense-1	III	204633	206912
SPBC725.04	0.22	5.61	0.00464949	0.10551	hac1	II	1208655	1210856
SPBC1861.01c	0.34	6.11	0.00471547	0.106627	cnp3	II	4126318	4129456
SPBC1703.11	-0.18	5.61	0.00477357	0.1068	SPBC1703.11	II	2934596	2936122
SPBC23G7.07c	-0.21	5.77	0.00476016	0.1068	cms1	II	2109254	2110547
SPBC947.09	0.19	5.28	0.00474582	0.1068	hsp3103	II	656117	657873
SPBPB2B2.12c	-0.87	3.04	0.00483058	0.107697	gal10	II	4484023	4487569
SPAC144.13c	0.23	5.42	0.00493013	0.10915	srw1	I	4677611	4681148
SPAC1556.05c	-0.17	6.01	0.00491653	0.10915	cgr1	I	3801220	3804334
SPBC11G11.05	-0.26	5.68	0.00497011	0.109274	rpa34	II	1763709	1764620
SPBC725.06c	0.38	3.29	0.00495726	0.109274	ppk31	II	1212690	1216671
SPAC56E4.03	-0.45	8.8	0.00503308	0.10936	SPAC56E4.03	I	1243849	1245837
SPBC12D12.09	0.25	3.89	0.00504706	0.10936	rev7	II	2313096	2314605
SPBC14C8.05c	0.66	0.61	0.00506026	0.10936	meu17	II	2211798	2213495
SPBC1773.06c	0.26	3.8	0.00507802	0.10936	adh8	II	293225	294725
SPBC56F2.15	0.54	6.19	0.00502871	0.10936	tam13	II	4103472	4103759
SPCC4F11.03c	0.17	6.56	0.0050945	0.10936	SPCC4F11.03c	III	2006651	2008106
SPCC70.02c	0.23	6.34	0.00503207	0.10936	SPCC70.02c	III	2349058	2349792
SPBC1711.16	-0.22	7.9	0.0051196	0.109528	pwp1	II	2164012	2165996
SPCC1235.13	-2.08	1.13	0.00513884	0.109571	ght6	III	204706	206717
SPAC2F3.05c	0.24	4.79	0.00520007	0.110477	SPAC2F3.05c	I	3928625	3929950
SPBC1709.06	-0.25	5.56	0.00521609	0.110477	dus2	II	1108615	1110598
SPBC32F12.03c	0.53	7.48	0.00524739	0.11077	gpx1	II	2788863	2789614
SPAC23D3.11	0.39	5.11	0.00526726	0.110822	ayr1	I	4357920	4360891
SPAC17H9.10c	-0.21	7.37	0.00529758	0.111037	ddb1	I	2020968	2024999
SPBC16H5.15	-0.21	4.63	0.00531243	0.111037	SPBC16H5.15	II	2290595	2291371
SPAC4F10.02	0.19	6.06	0.00536622	0.111526	aap1	I	4832879	4834570
SPAC9.04	-3.09	-2.93	0.00537093	0.111526	Tf2-1	I	1465785	1469848
SPAC3A11.11c	0.17	5.81	0.00539308	0.111621	SPAC3A11.11c	I	3446262	3448081
SPAC167.08	-0.42	2.12	0.00543272	0.112019	Tf2-2	I	1564101	1568523
SPCC1682.08c	-0.33	6.08	0.00544755	0.112019	mcp2	III	386020	388386
SPBC2D10.05	0.46	6.63	0.00547604	0.112241	exg3	II	2974778	2976604
SPAC4H3.04c	0.39	2.52	0.00554259	0.112464	SPAC4H3.04c	I	3830805	3832278
SPAC521.03	-0.32	7.42	0.00552026	0.112464	SPAC521.03	I	844948	846142
SPBC16E9.08	0.41	2.27	0.00557194	0.112464	mcp4	II	1928803	1929870
SPBC16H5.13	0.17	6.38	0.00558955	0.112464	SPBC16H5.13	II	2269397	2273358
SPBC4F6.09	-0.4	7.77	0.00555057	0.112464	str1	II	2704645	2707648
SPCC14G10.03c	0.19	6.42	0.00559309	0.112464	ump1	III	747501	748632
SPAC23H4.04	-0.19	5.53	0.00563291	0.112907	slm3	I	1601412	1603005
SPBC24C6.06	0.21	6.66	0.00565603	0.113014	gpa1	II	2329672	2331890
SPAC19A8.07c	-0.19	6.94	0.00572639	0.113715	imp4	I	2474620	2475765
SPBC1271.10c	-0.44	5.34	0.00572693	0.113715	SPBC1271.10c	II	347590	350376
SPAC23D3.10c	-0.17	7.16	0.00587652	0.11384	eng2	I	4355410	4358242
SPAC3A11.03	0.25	4.32	0.00579414	0.11384	efm3	I	3466459	3470168
SPBC30D10.14	0.38	5.43	0.00587363	0.11384	SPBC30D10.14	II	3067909	3068892
SPBC3H7.07c	-0.17	7.09	0.00579695	0.11384	ser2	II	1870281	1871749
SPBC409.18	0.16	6.57	0.00586826	0.11384	SPBC409.18	II	1171492	1172644
SPCC757.03c	0.48	4.06	0.00583707	0.11384	hsp3101	III	47325	48577
SPNCRNA.07	-0.41	4.11	0.00579421	0.11384	meu3	III	41985	42728
SPNCRNA.1373	0.61	0.21	0.00586447	0.11384	SPBC839.03c-antisense-1	II	599413	600456
SPNCRNA.130	-0.32	5.76	0.00589614	0.113873	omt3	I	4516070	4517070
SPAPB1E7.05	0.15	7.69	0.00610238	0.117144	gde1	I	3293591	3297452
SPAPB24D3.06c	0.17	5.79	0.00608396	0.117144	SPAPB24D3.06c	I	2955693	2957733
SPAC1399.04c	-0.26	3.8	0.00613147	0.117348	SPAC1399.04c	I	1840621	1841283
SPAC1039.11c	-1.61	5.74	0.00624524	0.11794	gto1	I	5471270	5474941
SPAC17H9.14c	0.21	8.62	0.00639257	0.11794	pdi2	I	2029143	2030361
SPAC688.04c	0.37	5.37	0.00627264	0.11794	gst3	I	3115639	3116928
SPBC21B10.04c	0.25	8.67	0.0062771	0.11794	nrf1	II	1664541	1665121
SPBC4C3.04c	0.22	3.85	0.00633365	0.11794	dss4	II	3137541	3138228
SPBP26C9.02c	-0.21	5.68	0.00637585	0.11794	car1	II	323944	325565
SPBP4G3.03	-0.4	1.7	0.00633842	0.11794	fub2	II	4453054	4454161
SPCC70.03c	-0.19	8.74	0.00631433	0.11794	SPCC70.03c	III	2350268	2352631
SPCC757.07c	0.6	7.14	0.00640375	0.11794	ctt1	III	56654	58865
SPCP31B10.06	0.65	7.38	0.00634873	0.11794	mug190	III	532584	537202
SPNCRNA.1446	0.29	3.4	0.00623721	0.11794	meu25-antisense-1	II	1563622	1565852
SPNCRNA.1558	-1.2	0.63	0.0062289	0.11794	qcr10-antisense-1	II	2884156	2887140
SPNCRNA.768	0.32	2.49	0.00639238	0.11794	SPNCRNA.768	I	1875085	1875651
SPAC22H10.12c	0.3	7.49	0.00646915	0.1187	gdi1	I	2395068	2396905
SPNCRNA.867	-0.28	3.2	0.00648235	0.1187	SPNCRNA.867	I	2973017	2976287
SPNCRNA.293	-0.76	1.26	0.0065092	0.118849	SPNCRNA.293	II	120577	121643
SPNCRNA.1230	0.4	2.55	0.00655888	0.119413	ist1-antisense-1	III	1795741	1796894
SPAC323.07c	-0.26	7.45	0.00659908	0.11946	SPAC323.07c	I	3917636	3920119
SPAC513.02	0.7	1.69	0.00659049	0.11946	SPAC513.02	I	2911289	2912543
SPBC83.15	-0.2	7	0.00662528	0.119594	SPBC83.15	II	1536803	1538567
SPAC1952.04c	0.23	4.31	0.00672215	0.120999	SPAC1952.04c	I	4972426	4973471
SPAC11D3.19	-0.34	3.97	0.00681878	0.121574	SPAC11D3.19	I	106893	108361
SPAC13D6.03c	-0.18	5.58	0.00682411	0.121574	trm9	I	2249892	2251382
SPAC22F3.03c	0.29	5.25	0.00679812	0.121574	rdh54	I	703669	707990
SPNCRNA.1574	0.35	2.83	0.00683066	0.121574	SPBC15D4.09c-antisense-1	II	3026241	3028547
SPCC1259.09c	-0.17	7.96	0.00690976	0.122639	pdx1	III	1049947	1051870
SPCC737.04	-1.52	3.67	0.00704681	0.124723	SPCC737.04	III	1891328	1893817
SPBC1773.02c	0.21	6.51	0.00711742	0.125441	bcp1	II	283603	284901
SPNCRNA.1564	0.79	0.52	0.0071269	0.125441	SPBC1703.11-antisense-1	II	2934727	2935979
SPAC31G5.19	0.18	7.62	0.00721978	0.126376	abo1	I	3023051	3028158
SPAC56E4.02c	0.21	4.68	0.00721341	0.126376	alg13	I	1242020	1243240
SPAC15A10.04c	-0.21	7.63	0.00741754	0.126729	zpr1	I	3683597	3685385
SPAC644.09	0.26	5.72	0.00732707	0.126729	SPAC644.09	I	2689590	2691120
SPBC14F5.02	-0.13	6.78	0.00741534	0.126729	trs65	II	4151465	4153311
SPBC244.02c	-0.15	6.65	0.00743958	0.126729	utp6	II	4357856	4359583
SPBPJ4664.03	-0.51	4.29	0.00742232	0.126729	mfm3	II	700291	700700
SPCC4B3.01	0.38	5.69	0.00744733	0.126729	tum1	III	1177720	1178984
SPCC613.07	-0.19	5.34	0.00739351	0.126729	SPCC613.07	III	91153	92898
SPCC794.04c	-1.37	3.6	0.00745936	0.126729	SPCC794.04c	III	248211	252103
SPNCRNA.1214	-0.65	1.21	0.00736778	0.126729	SPCC663.10-antisense-1	III	1650949	1652838
SPNCRNA.1319	0.38	2.06	0.00734682	0.126729	SPNCRNA.1319	II	157362	158316
SPNCRNA.269	0.4	3.78	0.00745146	0.126729	SPNCRNA.269	I	5413747	5414846
SPAC57A10.10c	-0.2	8.1	0.00757335	0.127982	sla1	I	1382408	1383592
SPBP4G3.02	0.48	11.45	0.00757239	0.127982	pho1	II	4446373	4449053
SPAC19G12.09	0.45	7.06	0.00764387	0.128047	SPAC19G12.09	I	4059980	4061192
SPAC22H10.06c	1.43	-2.51	0.0076668	0.128047	SPAC22H10.06c	I	2381320	2381601
SPBC106.08c	-0.43	3.25	0.00768821	0.128047	mug2	II	387156	388840
SPBP19A11.07c	0.21	5.03	0.00769811	0.128047	SPBP19A11.07c	II	2868413	2871156
SPCC16C4.10	0.18	7.73	0.00763803	0.128047	SPCC16C4.10	III	685848	687406
SPCP1E11.05c	0.26	6.67	0.00765018	0.128047	are2	III	2398339	2400840
SPAC3G9.11c	0.52	9.28	0.00779794	0.128706	SPAC3G9.11c	I	3159753	3162245
SPBC18E5.15	-0.29	2.46	0.00777147	0.128706	SPBC18E5.15	II	2091892	2092234
SPBC8E4.03	-0.19	6.91	0.00782774	0.128706	SPBC8E4.03	II	4434194	4435868
SPCC1322.04	0.32	9.79	0.00780342	0.128706	fyu1	III	1292109	1294029
SPNCRNA.1618	-0.21	3.81	0.00783902	0.128706	rft1-antisense-1	II	3580722	3582044
SPAC750.01	-0.52	2.52	0.00789292	0.129257	SPAC750.01	I	5555716	5556768
SPCC1450.13c	0.2	6.11	0.00792837	0.129503	SPCC1450.13c	III	1757320	1758409
SPCC550.07	0.23	4.05	0.0079999	0.130337	SPCC550.07	III	1196729	1199999
SPCC1020.09	-0.34	4.31	0.00806749	0.131102	gnr1	III	765936	767541
SPNCRNA.937	0.33	2.25	0.00813475	0.131858	SPAC1F12.08-antisense-1	I	3817467	3818781
SPAC22H10.10	0.23	5.22	0.00816046	0.131938	alp21	I	2389917	2391943
SPBC4B4.08	0.23	6.87	0.00820459	0.132315	ght2	II	3427180	3429424
SPNCRNA.1625	-0.28	4	0.00825274	0.132754	SPNCRNA.1625	II	3622474	3625877
SPBC27.08c	0.23	10.64	0.00830043	0.133184	sua1	II	1571423	1573100
SPNCRNA.1489	0.27	3.22	0.00840082	0.134455	aim27-antisense-1	II	2137529	2139540
SPAC25H1.09	0.77	-0.57	0.00850233	0.135255	mde5	I	2538102	2540081
SPAC57A10.09c	0.21	7.91	0.00849517	0.135255	nhp6	I	1380312	1381558
SPBC1773.13	-0.29	4.08	0.00851466	0.135255	SPBC1773.13	II	310402	312518
SPAC19G12.10c	0.23	11.3	0.00858989	0.136033	cpy1	I	4061377	4064952
SPAC22F8.05	0.69	7.79	0.00862174	0.136033	SPAC22F8.05	I	4791892	4795263
SPBC1604.04	0.16	8.05	0.00862781	0.136033	SPBC1604.04	II	3923954	3925407
SPAC32A11.01	0.19	6.88	0.00866455	0.136227	mug8	I	2445220	2447714
SPNCRNA.1203	-0.72	1.13	0.00868299	0.136227	rec7-antisense-1	III	1545574	1549995
SPAC144.01	-0.26	5.22	0.00899191	0.137016	SPAC144.01	I	4650573	4651169
SPAC15A10.06	0.17	6.23	0.00887075	0.137016	SPAC15A10.06	I	3688460	3691125
SPAC3A11.10c	0.21	7.1	0.00895339	0.137016	SPAC3A11.10c	I	3448125	3449855
SPBC1198.14c	-1.7	4.35	0.00907171	0.137016	fbp1	II	197660	199474
SPBC1773.12	-0.4	1.67	0.00894729	0.137016	SPBC1773.12	II	308160	310467
SPBC24C6.11	-0.14	6.47	0.00894174	0.137016	cwf14	II	2343566	2347300
SPBC3B9.07c	-0.17	6.84	0.00899876	0.137016	rpa43	II	4000467	4001584
SPBPB2B2.10c	-0.25	4.52	0.00897382	0.137016	gal7	II	4482234	4483799
SPCC1827.03c	0.24	8.4	0.00883771	0.137016	SPCC1827.03c	III	2378252	2380530
SPNCRNA.1159	0.39	1.14	0.00891841	0.137016	SPNCRNA.1159	III	772342	773345
SPNCRNA.1294	0.4	2.32	0.00901467	0.137016	SPCC1827.07c-antisense-1	III	2388207	2389852
SPNCRNA.1310	-1.1	-0.88	0.00891211	0.137016	SPNCRNA.1310	II	109405	109905
SPNCRNA.1325	0.37	1.96	0.00907833	0.137016	SPNCRNA.1325	II	199409	200559
SPNCRNA.1391	-0.33	2.19	0.00901433	0.137016	SPNCRNA.1391	II	845324	846320
SPNCRNA.1603	0.36	1.6	0.00907106	0.137016	trs3-antisense-1	II	3478536	3479968
SPNCRNA.61	-1.72	-1	0.00890153	0.137016	prl61	I	5546205	5546648
SPBC1604.07	0.14	8.35	0.00915508	0.137847	atp4	II	3918404	3920078
SPAC23C11.09	-0.16	9.29	0.00930488	0.139771	ala1	I	2147100	2150190
SPBC3E7.10	-0.15	6.97	0.00932716	0.139775	fma1	II	2678672	2680283
SPAC1486.01	0.21	7.52	0.00948121	0.140101	SPAC1486.01	I	3185314	3186584
SPAC56F8.13	-0.37	2.55	0.00947352	0.140101	SPAC56F8.13	I	1149078	1150659
SPBC839.17c	0.19	8.29	0.00947688	0.140101	fkh1	II	631697	632706
SPCPB1C11.01	-0.68	6.73	0.00944566	0.140101	amt1	III	2068977	2071707
SPNCRNA.789	0.4	2.62	0.00946675	0.140101	SPAC607.04-antisense-1	I	2042356	2043361
SPNCRNA.859	0.38	3.31	0.00945146	0.140101	amt3-antisense-1	I	2924745	2926536
SPBC16E9.05	0.18	9.18	0.00952624	0.140271	erg6	II	1923596	1925394
SPCC1739.08c	-1.66	3.45	0.00956341	0.140271	SPCC1739.08c	III	2041789	2044397
SPNCRNA.1120	-0.86	0.21	0.00958099	0.140271	SPNCRNA.1120	III	230600	231934
SPNCRNA.792	0.27	2.71	0.00954996	0.140271	SPNCRNA.792	I	2093221	2093941
SPAC2F3.08	0.27	6.2	0.0097789	0.142089	sut1	I	3935124	3938149
SPBC839.19	-0.36	1.99	0.00977414	0.142089	new20	II	604418	604920
SPCC1739.07	-0.19	6.41	0.00972915	0.142089	cti1	III	2041086	2042711
SPCC794.01c	-1.21	3.74	0.00979463	0.142089	zwf2	III	239463	241999
SPAC227.13c	-0.35	7.44	0.00982995	0.142277	isu1	I	517416	519017
SPAC15E1.10	0.29	4.1	0.0101235	0.142745	fub1	I	3732274	3733363
SPAC167.05	0.19	6.7	0.0101591	0.142745	SPAC167.05	I	1549926	1553310
SPAC1A6.03c	0.15	8.77	0.0102112	0.142745	SPAC1A6.03c	I	1069923	1072343
SPAC222.11	0.2	7.16	0.0100061	0.142745	hem13	I	966164	967591
SPAC23C4.17	-0.23	6.43	0.0100892	0.142745	trm402	I	1057701	1061166
SPAC343.13	0.15	5.11	0.0102581	0.142745	pet112	I	1670283	1672264
SPAC4G9.11c	0.24	6.67	0.00998377	0.142745	cmb1	I	2275503	2276260
SPBC16A3.02c	0.38	7.53	0.0102891	0.142745	SPBC16A3.02c	II	4296979	4298874
SPBC21H7.06c	0.4	2.56	0.0101005	0.142745	opi10	II	2264210	2265243
SPBC25B2.05	-0.2	6.8	0.0102686	0.142745	mis3	II	2605902	2607020
SPBC29A10.09c	0.24	4.11	0.00989704	0.142745	tri1	II	2554177	2557200
SPBC8D2.16c	-0.21	4.85	0.0101469	0.142745	SPBC8D2.16c	II	1386312	1389186
SPBP35G2.12	0.17	5.88	0.0100462	0.142745	SPBP35G2.12	II	988916	990326
SPCC1020.08	-0.16	7.65	0.0102464	0.142745	tyw1	III	767789	770340
SPCC777.06c	0.14	6.71	0.0102738	0.142745	SPCC777.06c	III	1606351	1607953
SPCPB16A4.04c	-0.17	5.74	0.0101264	0.142745	trm8	III	950726	952502
SPNCRNA.1018	-0.48	0.52	0.0101895	0.142745	SPAC1834.13-antisense-1	I	4721254	4722882
SPNCRNA.1168	0.45	1.32	0.0100233	0.142745	naa40-antisense-1	III	1030121	1031044
SPNCRNA.760	0.41	1.39	0.0101931	0.142745	rec12-antisense-1	I	1772501	1774232
SPAP7G5.04c	-0.33	9.93	0.0104401	0.144209	lys1	I	3739076	3743492
SPAPB1A11.03	0.69	4.22	0.0104197	0.144209	SPAPB1A11.03	I	2984439	2986118
SPAC2E12.03c	-0.26	5.59	0.0104891	0.144326	SPAC2E12.03c	I	5061722	5063721
SPNCRNA.1667	0.5	1.48	0.010494	0.144326	SPBC56F2.07c-antisense-1	II	4099940	4103093
SPAC1093.07	-0.42	1.55	0.0105803	0.144886	SPAC1093.07	I	4604880	4606871
SPCPB1C11.02	0.26	3.61	0.0105754	0.144886	SPCPB1C11.02	III	2072626	2074890
SPAC19G12.15c	0.14	8.36	0.0106249	0.145185	tpp1	I	4074998	4077914
SPNCRNA.1242	-0.54	0.48	0.0106771	0.145585	SPNCRNA.1242	III	1893796	1894483
SPAC3A12.02	0.17	4.65	0.0108394	0.146539	SPAC3A12.02	I	1421817	1422972
SPAPB1A10.07c	0.2	5.26	0.0108218	0.146539	SPAPB1A10.07c	I	1872250	1874093
SPBPB10D8.02c	-0.39	3.78	0.0107705	0.146539	SPBPB10D8.02c	II	83229	85631
SPCC1442.14c	0.16	6.29	0.0108039	0.146539	hnt1	III	1792660	1793343
SPAC26H5.08c	0.24	6.19	0.0109428	0.147	bgl2	I	4134378	4136031
SPAC8E11.10	-0.34	8.74	0.0109123	0.147	SPAC8E11.10	I	3372749	3375005
SPNCRNA.1008	0.28	2.71	0.0109398	0.147	SPNCRNA.1008	I	4647230	4649094
SPAC521.04c	0.19	7	0.0109966	0.1471	sst1	I	846022	849480
SPBC13G1.14c	0.17	5.25	0.0109867	0.1471	SPBC13G1.14c	II	3726995	3728200
SPNCRNA.1164	-0.38	2	0.0110912	0.148054	SPNCRNA.1164	III	966133	971255
SPAC10F6.10	-0.19	5.75	0.011246	0.148901	rio1	I	1225464	1227365
SPAC12G12.16c	0.16	4.78	0.0112085	0.148901	SPAC12G12.16c	I	315394	317585
SPAC23D3.04c	-0.18	9.05	0.0112484	0.148901	gpd2	I	4342230	4344039
SPCC290.02	-0.16	6.04	0.0111934	0.148901	rpc34	III	1992539	1994119
SPAC1F12.05	-0.18	6.14	0.0113028	0.149305	any2	I	3812515	3815745
SPBC359.03c	-0.38	8.23	0.0113282	0.149305	aat1	II	111007	113472
SPCC4F11.02	0.17	6.54	0.0113495	0.149305	ptc1	III	2004552	2006392
SPAC24H6.02c	-0.24	3.94	0.0114092	0.149756	tim15	I	488339	489482
SPCC1183.07	-0.25	9.61	0.0114309	0.149756	rrp5	III	606262	611786
SPNCRNA.1095	-1.86	-1.87	0.0114701	0.149961	SPNCRNA.1095	III	23919	24438
SPAP8A3.07c	-0.17	10.11	0.0115215	0.150173	SPAP8A3.07c	I	5326386	5328455
SPBC21B10.09	0.14	6.65	0.0115336	0.150173	SPBC21B10.09	II	1651920	1654486
SPAC3C7.05c	0.35	5.35	0.0115787	0.150452	mug191	I	2071691	2073591
SPCC1442.06	0.15	7.6	0.0116395	0.150933	pre8	III	1778069	1780442
SPAC4A8.04	0.28	8.07	0.011745	0.151991	isp6	I	2544815	2546981
SPAC1751.03	-0.13	8.98	0.0118542	0.152327	SPAC1751.03	I	386266	387856
SPAC25B8.10	0.15	6.59	0.0118521	0.152327	SPAC25B8.10	I	4172123	4173547
SPACUNK4.08	0.14	6.78	0.011865	0.152327	SPACUNK4.08	I	2895098	2898012
SPMIT.11	0.25	12.43	0.0118669	0.152327	cox2	MT	18561	19307
SPAC6G10.09	0.14	9.44	0.0118948	0.152379	SPAC6G10.09	I	3233580	3237281
SPNCRNA.200	-1.3	-2.08	0.0119705	0.153039	SPNCRNA.200	I	2663415	2664052
SPBC21B10.14	0.22	3.78	0.0120024	0.153139	ymr31	II	1651978	1652538
SPAC23H3.11c	-0.16	5.63	0.0120451	0.153375	SPAC23H3.11c	I	2512905	2514941
SPBC106.16	0.15	7.15	0.0121658	0.153376	pre6	II	409158	410766
SPBC1709.13c	-0.17	5.67	0.012092	0.153376	set10	II	1124433	1126087
SPBP8B7.12c	-0.14	6.47	0.0121572	0.153376	fta3	II	3654184	3655279
SPNCRNA.1053	0.3	3.19	0.0121268	0.153376	SPNCRNA.1053	I	5152528	5153825
SPNCRNA.1252	-0.26	4.02	0.0121187	0.153376	ams2-antisense-1	III	2000677	2003895
SPNCRNA.1026	0.27	2.28	0.0122169	0.153715	fus1-antisense-1	I	4814239	4817443
SPAC16E8.02	0.2	4.44	0.0122783	0.154183	SPAC16E8.02	I	3504034	3506896
SPNCRNA.602	0.64	1.08	0.0123035	0.154194	SPNCRNA.602	I	50851	51545
SPBC8E4.12c	0.3	4.32	0.0123398	0.154345	ecl3	II	4441340	4441609
SPBC725.03	0.41	4.19	0.0123703	0.154422	SPBC725.03	II	1206967	1208271
SPAC26F1.07	0.35	8.61	0.0124353	0.154848	SPAC26F1.07	I	5170789	5172112
SPBPB2B2.18	-0.9	-0.46	0.0124531	0.154848	SPBPB2B2.18	II	4502692	4503664
SPNCRNA.1680	0.49	0.71	0.0125118	0.155274	rtt109-antisense-1	II	4213720	4215008
SPBC14F5.07	-0.27	7.18	0.0126452	0.156319	doa10	II	4167478	4171911
SPBC1709.15c	-0.15	6.67	0.0126411	0.156319	cft2	II	1127954	1130425
SPAC11G7.05c	-0.17	4.73	0.0126895	0.156561	mct1	I	3969366	3971294
SPBC16D10.09	-0.12	7.98	0.0127783	0.157047	pcn1	II	3616412	3617845
SPNCRNA.1523	0.49	0.88	0.0127604	0.157047	SPBC365.11-antisense-1	II	2515001	2516186
SPNCRNA.1520	0.36	2.48	0.012805	0.157071	pim1-antisense-1	II	2488718	2491866
SPAC4F10.22	0.24	2.71	0.0128684	0.157545	cmc4	I	4878241	4878453
SPAC20G8.09c	-0.17	8.53	0.0130829	0.158922	nat10	I	1415452	1418825
SPBC1711.04	-0.14	6.79	0.0130959	0.158922	mtd1	II	2139698	2141050
SPBC409.15	-0.21	6.63	0.0130555	0.158922	tsr2	II	1167509	1168516
SPNCRNA.1063	-0.36	1.08	0.0130728	0.158922	SPNCRNA.1063	I	5266525	5269973
SPNCRNA.964	-0.31	2.4	0.0131059	0.158922	SPNCRNA.964	I	4142300	4143913
SPAC6C3.08	0.26	4.71	0.0131877	0.159609	nas6	I	2338103	2339312
SPAC977.16c	-1.26	4.75	0.0132194	0.159688	dak2	I	64559	66980
SPBC16A3.13	-0.35	2.4	0.0132954	0.159998	meu7	II	4272341	4274665
SPNCRNA.1137	0.48	1.41	0.0132744	0.159998	ubp16-antisense-1	III	394357	396657
SPNCRNA.764	0.41	1.88	0.0133257	0.16006	toe1-antisense-1	I	1838822	1840290
SPAC589.08c	0.23	3.6	0.013398	0.160625	dam1	I	3106191	3106934
SPBC14F5.01	-0.22	4.71	0.0134674	0.161152	SPBC14F5.01	II	4149451	4151009
SPAC10F6.17c	0.13	6.54	0.0135031	0.161275	SPAC10F6.17c	I	1239971	1241970
SPAC4F8.03	-0.17	6.74	0.0136072	0.16191	sdo1	I	2671901	2673213
SPNCRNA.1031	-0.74	0.72	0.0136069	0.16191	wsp1-antisense-1	I	4861450	4863757
SPCC1322.11	-0.17	8.91	0.0136679	0.162025	rpl2302	III	1311578	1312384
SPCC736.09c	0.36	4.22	0.0136604	0.162025	tfx1	III	329570	330657
SPNCRNA.839	0.21	4.67	0.0137071	0.162187	SPAC4A8.10-antisense-1	I	2564428	2566667
SPAC24B11.11c	0.2	6.85	0.0137657	0.162572	sid2	I	221694	223991
SPBC29A3.16	-0.21	6.35	0.0138163	0.162572	rrs1	II	2068069	2069263
SPCC306.08c	0.23	8.04	0.0138076	0.162572	mdh1	III	421646	423488
SPAC11D3.01c	0.52	4.63	0.0139164	0.162928	SPAC11D3.01c	I	108732	109195
SPAP32A8.02	0.18	7.31	0.0139202	0.162928	SPAP32A8.02	I	3405955	3409780
SPBC1604.01	0.22	6.23	0.0139235	0.162928	egt1	II	3930495	3933343
SPAC22H10.05c	0.17	7.04	0.0139661	0.163126	SPAC22H10.05c	I	2377677	2380412
SPAC22H10.02	0.14	5.49	0.0140062	0.163294	SPAC22H10.02	I	2371726	2372900
SPNCRNA.1194	-0.31	2.45	0.0141367	0.164514	hta1-antisense-1	III	1410745	1412364
SPBC2G2.08	-0.19	8.09	0.0141812	0.16473	ade9	II	3448865	3452766
SPAC4H3.01	-0.15	7.16	0.0142126	0.164785	SPAC4H3.01	I	3821682	3824461
SPBC1289.08	0.14	5.33	0.0142406	0.164785	uap1	II	4397235	4399305
SPCC338.12	0.4	5.57	0.0142637	0.164785	pbi2	III	1355008	1355680
SPAC4H3.06	-0.17	5.07	0.0143112	0.164911	SPAC4H3.06	I	3837306	3839626
SPNCRNA.1607	0.27	2.15	0.0143266	0.164911	SPNCRNA.1607	II	3496926	3498873
SPBC29A10.14	0.22	3.88	0.0144101	0.165423	rec8	II	2568893	2570993
SPCC1682.09c	-0.21	5.45	0.0144231	0.165423	ggc1	III	388657	390514
SPAC630.05	0.18	5.8	0.0146707	0.166625	gyp7	I	353783	356580
SPBC1683.12	0.14	5.4	0.0146182	0.166625	SPBC1683.12	II	166814	170140
SPBC16D10.02	-0.23	5.63	0.0146581	0.166625	trm11	II	3588806	3590386
SPBC17F3.02	0.13	6.33	0.0146593	0.166625	nak1	II	2482067	2484495
SPBC27B12.13	-0.13	8.68	0.0146852	0.166625	tom40	II	1356208	1357927
SPBC660.06	0.44	7.38	0.0145725	0.166625	SPBC660.06	II	204405	205721
SPCC794.02	0.27	4.27	0.014805	0.167685	wtf5	III	241472	245622
SPBC839.06	-0.77	5.22	0.0149448	0.168967	cta3	II	607214	611989
SPCC4E9.02	-0.16	6.36	0.0149815	0.169081	cig1	III	1227174	1229303
SPAC26F1.14c	0.3	5.3	0.0151425	0.170271	aif1	I	5146123	5148353
SPBC14C8.12	-0.23	6.62	0.0151271	0.170271	rpb8	II	2223641	2224720
SPBC1683.05	-0.2	7.21	0.0152006	0.170271	SPBC1683.05	II	147915	150574
SPBP22H7.02c	-0.16	7.02	0.0151775	0.170271	mrd1	II	1433225	1436127
SPNCRNA.881	0.38	1.79	0.0152209	0.170271	SPNCRNA.881	I	3060233	3061210
SPBC106.02c	0.22	4.53	0.0152826	0.17066	srx1	II	376253	377036
SPCC553.03	-0.16	6.5	0.0153647	0.171276	pex1	III	302314	305477
SPAC1834.11c	0.19	7.9	0.0155727	0.17179	sec18	I	4718513	4721597
SPAC1D4.03c	0.18	4.64	0.0154853	0.17179	aut12	I	641845	643775
SPAC23C4.16c	0.18	6.47	0.0154927	0.17179	atg15	I	1055849	1057578
SPAC3F10.15c	0.33	5.45	0.0155309	0.17179	spo12	I	2845471	2849267
SPBP4H10.11c	-0.16	8.36	0.0154498	0.17179	lcf2	II	2892129	2894902
SPCC417.09c	0.16	5.23	0.015573	0.17179	SPCC417.09c	III	1691219	1695091
SPCC737.03c	-0.17	6.17	0.015633	0.172153	ima1	III	1888103	1891959
SPAC17A2.02c	-0.21	8.11	0.0157155	0.172761	SPAC17A2.02c	I	3552290	3554138
SPBC13G1.12	0.16	5.57	0.0157695	0.173056	did2	II	3752317	3753680
SPAC1D4.04	-0.13	8.48	0.0158376	0.173112	cct2	I	644667	646547
SPCC1235.01	0.23	8.88	0.0158465	0.173112	SPCC1235.01	III	174097	176473
SPCC320.06	-0.12	7.28	0.0158563	0.173112	SPCC320.06	III	152941	159654
SPCC1753.02c	-0.28	6.22	0.0159658	0.173817	git3	III	1542333	1546161
SPNCRNA.1477	0.33	1.95	0.0159756	0.173817	SPNCRNA.1477	II	1938749	1939319
SPNCRNA.1021	0.31	3.77	0.0160367	0.174183	SPNCRNA.1021	I	4748524	4752562
SPAC3G9.10c	-0.18	5.55	0.0161337	0.174639	rrp41	I	3163136	3164354
SPCC622.12c	-0.19	9.35	0.0161095	0.174639	gdh1	III	1419131	1421212
SPAC1782.10c	-0.18	7.99	0.0162091	0.175158	nhp2	I	4772002	4773217
SPBC3D6.13c	0.13	8.88	0.0162505	0.175307	pdi3	II	1293360	1296034
SPAPB8E5.05	-0.52	7.22	0.0163761	0.175918	mfm1	I	4916603	4917521
SPCC594.04c	0.18	5.01	0.0163902	0.175918	SPCC594.04c	III	362375	363826
SPNCRNA.322	-0.33	1.76	0.0163684	0.175918	SPNCRNA.322	II	674049	676227
SPAC869.05c	0.35	7.42	0.0164644	0.176158	SPAC869.05c	I	5505583	5508782
SPBC26H8.03	0.18	9.85	0.0164681	0.176158	cho2	II	3945742	3948940
SPBC19F5.05c	-0.19	8.49	0.016584	0.176508	ppp1	II	3711419	3713713
SPBC713.11c	0.36	8.32	0.0165388	0.176508	pmp3	II	887573	888695
SPCC297.04c	-0.25	3.76	0.0165841	0.176508	set7	III	1880992	1882276
SPAC17A5.19	-0.25	2.89	0.0166564	0.176796	SPAC17A5.19	I	1760784	1761455
SPBC32H8.07	0.29	4.68	0.0166668	0.176796	git5	II	1463829	1465745
SPCC576.17c	-1.37	2.73	0.0167722	0.177618	SPCC576.17c	III	2111240	2113660
SPBC1347.02	-0.25	8.82	0.0168792	0.178453	fkbp39	II	4064502	4065960
SPAC1002.07c	0.25	7.05	0.0170084	0.17952	ats1	I	1807996	1809433
SPBC365.20c	0.15	5.01	0.017133	0.180536	pnc1	II	2494114	2497857
SPNCRNA.1357	0.26	2.46	0.0172276	0.181232	SPNCRNA.1357	II	437846	439998
SPAC3F10.19	0.17	6.74	0.0173204	0.181248	spd2	I	2830300	2831707
SPAP14E8.02	0.13	7.93	0.0173547	0.181248	tos4	I	1922552	1924915
SPBC19C2.13c	-0.2	5.6	0.0172592	0.181248	ctu2	II	1700751	1702122
SPBC776.16	-0.21	4.03	0.0173838	0.181248	mis20	II	3209353	3211163
SPCC1739.05	-0.2	5.59	0.0174003	0.181248	set5	III	2035624	2036993
SPCC1919.13c	-0.17	5.42	0.0173108	0.181248	SPCC1919.13c	III	2236061	2237390
SPBC713.10	-0.13	6.25	0.0175256	0.182042	tim16	II	886481	887647
SPNCRNA.1006	0.41	0.77	0.0175338	0.182042	dhc1-antisense-1	I	4625840	4627501
SPBC4.07c	0.15	8.12	0.0175853	0.182279	rpt2	II	1197778	1199431
SPAC26F1.12c	-0.16	5.99	0.0176784	0.182946	hgh1	I	5153823	5155228
SPAC222.14c	0.57	7.39	0.0178203	0.183963	sey1	I	973843	976782
SPAC4D7.10c	0.14	5.26	0.0178346	0.183963	spt20	I	5369400	5371874
SPBC609.04	0.22	5.18	0.0179797	0.185159	caf5	II	3166119	3168485
SPNCRNA.1067	0.67	0.73	0.0180304	0.185381	map1-antisense-1	I	5292484	5293268
SPAC17C9.10	-0.27	7.18	0.0181503	0.185712	stm1	I	4481792	4483837
SPBC409.09c	0.18	4.28	0.018139	0.185712	mis13	II	1154304	1155626
SPCC23B6.01c	0.19	9.33	0.0181473	0.185712	SPCC23B6.01c	III	1264347	1266936
SPCC1795.04c	0.17	7.61	0.0182385	0.186314	pre10	III	990627	992059
SPNCRNA.1078	-0.42	1.47	0.0183322	0.18697	spt20-antisense-1	I	5370228	5372083
SPAC23D3.05c	0.19	3.63	0.0186124	0.188317	SPAC23D3.05c	I	4344572	4346170
SPAC31G5.05c	-0.13	8.05	0.0185006	0.188317	SPAC31G5.05c	I	2994792	2995933
SPAC806.05	0.21	4.48	0.0186044	0.188317	SPAC806.05	I	244214	247574
SPNCRNA.623	0.18	3.77	0.0185661	0.188317	SPNCRNA.623	I	213527	215928
SPNCRNA.736	-0.26	4.11	0.0185405	0.188317	SPNCRNA.736	I	1356930	1359496
SPBC19C2.04c	-0.55	5.54	0.0186456	0.188353	ubp11	II	1676352	1678652
SPBC1604.06c	-0.21	6.76	0.0188842	0.188683	noc4	II	3920068	3921674
SPBC21B10.15	0.28	4.11	0.0187957	0.188683	SPBC21B10.15	II	1665510	1666668
SPBC2G5.02c	-0.15	6.81	0.018898	0.188683	ckb2	II	2577791	2580148
SPBC3B9.19	-0.12	8.2	0.0189158	0.188683	mge1	II	4022474	4023772
SPCC737.08	-0.28	10	0.0189122	0.188683	SPCC737.08	III	1900472	1914833
SPNCRNA.1602	-0.21	5.05	0.018742	0.188683	hop1-antisense-1	II	3472409	3474227
SPNCRNA.1628	0.37	1.46	0.0188094	0.188683	ppm1-antisense-1	II	3645288	3647532
SPNCRNA.833	0.19	3.61	0.0189074	0.188683	SPNCRNA.833	I	2527828	2529986
SPCC663.11	-0.13	5.09	0.0189631	0.188858	saf1	III	1653343	1655582
SPAC7D4.05	0.15	5.34	0.0190818	0.189195	SPAC7D4.05	I	2628635	2630262
SPCC18B5.05c	0.16	7.16	0.019078	0.189195	SPCC18B5.05c	III	726794	728895
SPNCRNA.1636	0.25	2.84	0.0190862	0.189195	SPBC31F10.02-antisense-1	II	3755596	3756574
SPAC19B12.11c	-0.18	7.05	0.0192468	0.190115	SPAC19B12.11c	I	4903418	4904283
SPAC5H10.06c	-0.2	8.2	0.0192689	0.190115	adh4	I	156430	158307
SPNCRNA.1099	-0.18	3.58	0.0192542	0.190115	SPNCRNA.1099	III	46987	47566
SPACUNK4.09	-0.25	4.82	0.0194965	0.191765	SPACUNK4.09	I	2893836	2894991
SPBC32F12.05c	-0.16	5.65	0.0194762	0.191765	cwf12	II	2793140	2794328
SPCC663.18	0.18	6.99	0.0195482	0.191977	SPCC663.18	III	1641749	1642968
SPCC4G3.13c	0.17	5.89	0.0196955	0.193125	cue1	III	445088	446630
SPAC17A5.09c	0.15	5.69	0.0197748	0.19322	glc8	I	1768709	1770113
SPBC17D1.07c	0.2	4.64	0.0197964	0.19322	npg1	II	3340660	3345299
SPBC651.05c	0.2	4.81	0.0197367	0.19322	dot2	II	1245920	1247116
SPBC2G5.03	-0.14	5.49	0.019931	0.194235	ctu1	II	2581919	2583104
SPNCRNA.687	0.6	-1.02	0.0200717	0.195308	cph1-antisense-1	I	799485	800012
SPNCRNA.607	0.42	3.15	0.0201847	0.196106	fta5-antisense-1	I	99046	101140
SPACUNK4.20	-0.41	1.43	0.0202716	0.196351	SPACUNK4.20	I	2892446	2893920
SPBC660.05	-0.86	3.88	0.0202611	0.196351	SPBC660.05	II	202257	203623
SPAC1486.09	-0.2	6.91	0.0203842	0.196598	nob1	I	3209851	3211529
SPBC18H10.20c	-0.17	7.72	0.0203481	0.196598	any1	II	1808258	1810338
SPCC1259.14c	0.34	1.45	0.02039	0.196598	meu27	III	1061503	1064195
SPBC29A3.10c	0.18	6.93	0.0204803	0.19681	atp14	II	2056588	2057705
SPCC1753.03c	-0.61	0.33	0.0205049	0.19681	rec7	III	1547051	1549069
SPCC2H8.02	-0.2	5.12	0.0204996	0.19681	SPCC2H8.02	III	827911	830947
SPAC11D3.17	-0.2	5.27	0.0206146	0.197564	SPAC11D3.17	I	141199	144768
SPBC1685.11	-0.18	5.23	0.0206529	0.197633	rlp1	II	518095	519645
SPAC2E1P5.01c	-0.15	6.67	0.0207041	0.197825	mns1	I	3322678	3324881
SPAC688.03c	0.29	3.2	0.020771	0.197869	SPAC688.03c	I	3114508	3115380
SPBC29A10.16c	-0.12	7.22	0.0207555	0.197869	SPBC29A10.16c	II	2574663	2576202
SPBC18H10.03	-0.17	8.72	0.0209878	0.199636	tif35	II	1772999	1774547
SPAC22E12.07	-0.13	7.61	0.0211259	0.200355	rna1	I	5030439	5033261
SPCP1E11.08	-0.16	7.31	0.0211265	0.200355	nsa2	III	2406230	2407614
SPCC16C4.03	0.17	6.7	0.0211939	0.200695	pin1	III	664514	666057
SPAC31A2.06	-0.12	6.55	0.021227	0.200709	atp25	I	397426	402487
SPAC18G6.02c	-0.12	6.14	0.0212974	0.201076	chp1	I	2210810	2214664
SPAC30C2.04	-0.12	8.86	0.0213873	0.201384	asc1	I	4638117	4639647
SPCC162.06c	0.17	5.06	0.0213935	0.201384	SPCC162.06c	III	1576664	1578092
SPAC13G6.07c	-0.17	10.61	0.0215061	0.201548	rps601	I	186314	187683
SPAC22F8.09	-0.21	7.4	0.0216124	0.201548	rrp16	I	4803032	4804584
SPBC1289.17	-0.21	5.35	0.021573	0.201548	Tf2-11	II	4414657	4418658
SPBC18H10.16	-0.14	6.8	0.0216329	0.201548	can1	II	1796634	1801952
SPBP22H7.04	0.14	5.2	0.021537	0.201548	SPBP22H7.04	II	1437967	1440557
SPCPB16A4.06c	-0.75	2.98	0.0215219	0.201548	SPCPB16A4.06c	III	956012	957627
SPNCRNA.1548	0.37	2.64	0.0215905	0.201548	SPBC336.13c-antisense-1	II	2764286	2765303
SPCC550.15c	-0.13	7.81	0.0216736	0.201631	SPCC550.15c	III	1221239	1223176
SPAC57A7.08	0.14	7.46	0.0217234	0.201799	pzh1	I	1527565	1529862
SPAC19A8.05c	0.15	6.04	0.0218803	0.201863	sst4	I	2477864	2480031
SPAC1A6.02	-0.15	6.29	0.0217859	0.201863	SPAC1A6.02	I	1068668	1070235
SPBP22H7.03	0.19	5.52	0.0218891	0.201863	SPBP22H7.03	II	1436249	1437475
SPCC285.07c	-0.46	0.6	0.0218689	0.201863	wtf18	III	1806589	1808756
SPNCRNA.757	-1.1	-1.1	0.0218775	0.201863	SPNCRNA.757	I	1725052	1725780
SPBP8B7.09c	-0.14	7.18	0.0219532	0.201867	los1	II	3647074	3650172
SPCC290.04	0.16	6.54	0.0219484	0.201867	ams2	III	2001145	2004364
SPNCRNA.188	-0.66	-0.86	0.0220501	0.202466	SPNCRNA.188	I	2228049	2228781
SPAC1952.02	-0.21	5.39	0.0220924	0.202508	tma23	I	4969822	4970737
SPAC1A6.08c	0.33	2.68	0.0221503	0.202508	mug125	I	1086242	1087505
SPNCRNA.795	0.26	3.48	0.0221379	0.202508	utp5-antisense-1	I	2112071	2114599
SPAC1F7.05	0.15	9.09	0.0222146	0.20272	cdc22	I	4226958	4229989
SPNCRNA.249	-0.62	0.42	0.0222373	0.20272	SPNCRNA.249	I	4565700	4566208
SPAC19B12.01	-0.18	7.56	0.0223267	0.202953	SPAC19B12.01	I	4875418	4878120
SPNCRNA.1302	0.35	2.69	0.0223099	0.202953	eno102-antisense-1	II	58453	59684
SPNCRNA.754	-1.04	-2.43	0.0223804	0.20315	bst1-antisense-1	I	1686076	1686662
SPAC8F11.04	-0.18	7.58	0.0225954	0.204791	SPAC8F11.04	I	2859388	2861935
SPNCRNA.743	0.35	2.53	0.0226257	0.204791	SPNCRNA.743	I	1481083	1482570
SPCC24B10.13	-0.14	5.2	0.022767	0.205777	skb5	III	923069	923491
SPCC1494.05c	-0.13	7.65	0.0228101	0.205874	ubp12	III	2328869	2332513
SPAC3C7.13c	0.14	5.79	0.0230802	0.206551	SPAC3C7.13c	I	2089555	2093285
SPAC4G8.07c	-0.16	5.99	0.0229413	0.206551	trm2	I	774000	776062
SPBC1711.10c	0.13	6.52	0.022974	0.206551	npl4	II	2152031	2154477
SPBC405.04c	0.21	7.19	0.0229914	0.206551	ypt7	II	3147096	3148452
SPCC1739.06c	0.21	6.89	0.0230621	0.206551	SPCC1739.06c	III	2037670	2039988
SPCC622.17	-0.16	4.16	0.0230234	0.206551	apn1	III	1435080	1436649
SPCC70.10	0.2	5.17	0.02326	0.207868	SPCC70.10	III	2370832	2371916
SPAC3H8.09c	0.15	4.91	0.0233837	0.208532	nab3	I	604312	607742
SPBC106.14c	-0.17	7.62	0.0234327	0.208532	sda1	II	404099	406902
SPNCRNA.618	0.43	0.29	0.0234088	0.208532	gpi7-antisense-1	I	176878	177943
SPBC17D1.06	-0.19	8.57	0.0234781	0.208643	dbp3	II	3338604	3340901
SPAPB1A10.06c	-0.15	7.58	0.0235306	0.208818	SPAPB1A10.06c	I	1867971	1871913
SPBC1773.07c	-0.13	8.72	0.0235956	0.209103	sbp1	II	296047	297199
SPBC2D10.06	0.2	3.46	0.0238383	0.210959	rep1	II	2976695	2978838
SPAC25B8.08	0.16	5.42	0.0239837	0.211951	SPAC25B8.08	I	4168212	4170189
SPAC144.12	-0.26	7.82	0.0240199	0.211976	rki1	I	4675116	4678174
SPAC13F5.03c	-1.87	4.26	0.0241763	0.212955	gld1	I	2174641	2177050
SPAC4F10.06	-0.19	6.7	0.0242303	0.212955	bud22	I	4838959	4840514
SPAC56E4.04c	-0.25	11.05	0.0242314	0.212955	cut6	I	1245716	1253559
SPAC12B10.16c	0.16	7.02	0.0242728	0.213024	mug157	I	4601278	4603478
SPBC776.17	-0.18	5.89	0.0244361	0.213866	rrp7	II	3211305	3212274
SPCC4G3.18	-0.14	7.75	0.0244336	0.213866	rix1	III	435804	438607
SPBC1685.12c	-0.25	3.52	0.0245196	0.214302	SPBC1685.12c	II	522659	525686
SPAC16E8.11c	0.11	6.56	0.024667	0.215294	tfb1	I	3520173	3522395
SPAC29E6.09	0.19	4.72	0.0247789	0.215974	SPAC29E6.09	I	4417364	4418680
SPCC31H12.05c	-0.14	6.08	0.0248532	0.215974	sds21	III	628570	631529
SPNCRNA.1328	0.53	1.29	0.0248242	0.215974	SPBC660.08-antisense-1	II	210126	211344
SPNCRNA.796	0.28	2.19	0.0248808	0.215974	SPNCRNA.796	I	2123296	2125833
SPAC1486.02c	0.12	6.26	0.0250109	0.216217	dsc2	I	3186322	3188100
SPBC337.10c	-0.17	7.55	0.0249997	0.216217	SPBC337.10c	II	1047833	1049923
SPNCRNA.700	0.49	1.29	0.0250083	0.216217	mss1-antisense-1	I	951028	952560
SPBC21C3.04c	-0.16	5.82	0.0250801	0.21652	SPBC21C3.04c	II	3803224	3805100
SPNCRNA.1140	0.44	1.82	0.0251876	0.217154	aphl-antisense-1	III	468550	470462
SPAC16C9.02c	-0.12	7.03	0.0252731	0.217266	SPAC16C9.02c	I	792521	793937
SPAC22G7.08	-0.17	4.53	0.0253076	0.217266	ppk8	I	749523	751846
SPAC4G8.10	0.17	4.64	0.0252878	0.217266	gos1	I	781348	783419
SPAC513.06c	0.14	5.35	0.0253717	0.217266	dhd1	I	2914746	2920279
SPNCRNA.959	0.36	1.21	0.0253477	0.217266	pcf2-antisense-1	I	4119468	4120689
SPAC6B12.05c	-0.11	6.52	0.0254403	0.21756	ies2	I	2418661	2419945
SPAC139.02c	-0.17	7.34	0.0256472	0.218345	oac1	I	1019248	1020838
SPAC23D3.07	0.15	7.64	0.0256399	0.218345	pup1	I	4350803	4352369
SPBC354.07c	0.11	8.2	0.0256665	0.218345	SPBC354.07c	II	557827	560416
SPBC354.11c	-0.32	2.33	0.0256694	0.218345	SPBC354.11c	II	574658	578723
SPAC14C4.11	0.14	9.74	0.0259571	0.219085	vtc2	I	5247703	5250638
SPAPJ760.03c	0.21	6.57	0.0258709	0.219085	adg1	I	5265435	5266589
SPBC106.03	0.13	6.86	0.0258016	0.219085	SPBC106.03	II	378360	380053
SPBC2D10.19c	-0.17	5.44	0.0259969	0.219085	alb1	II	3003351	3003938
SPBC36B7.09	-0.1	8.15	0.0259686	0.219085	gcn2	II	2395941	2401552
SPBC839.04	-0.27	8.03	0.0259222	0.219085	rpl803	II	601209	602186
SPNCRNA.1559	-0.72	-1.22	0.0259979	0.219085	SPNCRNA.1559	II	2885636	2886536
SPAC22H12.01c	0.2	5.17	0.0262132	0.219559	mug35	I	893278	894532
SPBC106.18	-0.17	9.92	0.0262447	0.219559	rpl2501	II	413462	414503
SPBC14C8.14c	-0.14	7.75	0.0262726	0.219559	pol5	II	2225986	2229087
SPBC16C6.02c	0.14	8.7	0.0263304	0.219559	vps1302	II	4322829	4332028
SPBC460.01c	-0.17	6.22	0.0261402	0.219559	SPBC460.01c	AB325691	1479	3197
SPBC660.09	0.19	5.22	0.0262897	0.219559	mug168	II	211511	212091
SPCC569.06	0.13	7.43	0.0263107	0.219559	SPCC569.06	III	2420265	2422307
SPNCRNA.268	0.69	-0.14	0.0262624	0.219559	SPNCRNA.268	I	5411152	5411543
SPBC14C8.19	-0.18	5.45	0.0263928	0.21979	tam10	II	2218540	2219196
SPBC17A3.08	-0.13	5.88	0.0264281	0.219796	SPBC17A3.08	II	1416205	1417863
SPBC21D10.07	0.15	5.27	0.0265008	0.219825	cmc1	II	2432036	2433590
SPCC1223.07c	-0.12	9.88	0.0264842	0.219825	drs1	III	1852631	1854572
SPAP8A3.12c	0.12	8.03	0.0265505	0.21995	tpp2	I	5336681	5340639
SPAC19D5.01	-0.52	3.73	0.026667	0.220341	pyp2	I	5202366	5205202
SPNCRNA.903	-0.36	2.22	0.0266542	0.220341	SPAC8E11.08c-antisense-1	I	3374997	3375669
SPBC24C6.04	-0.32	9.49	0.0267683	0.22089	SPBC24C6.04	II	2325032	2327098
SPAPB24D3.10c	-1.46	4.3	0.0268116	0.220961	agl1	I	2967916	2972064
SPAC8C9.16c	0.18	4.51	0.0269144	0.221521	mug63	I	3671926	3673470
SPAC4F8.04	-0.2	6.42	0.0269555	0.221572	SPAC4F8.04	I	2670293	2671587
SPAC212.07c	0.44	-0.04	0.0270413	0.221599	SPAC212.07c	I	13665	14555
SPAC26A3.17c	-0.12	6.47	0.0273244	0.221599	SPAC26A3.17c	I	3371257	3372581
SPAC4A8.16c	-0.14	10.25	0.0273772	0.221599	tif33	I	2580100	2583046
SPAC6B12.13	0.16	5.93	0.0271144	0.221599	SPAC6B12.13	I	2435833	2437020
SPAC824.04	0.16	6.37	0.0272255	0.221599	swd22	I	1690187	1691715
SPBC13G1.04c	-0.18	5.4	0.0273271	0.221599	abh1	II	3732634	3734079
SPBC1539.07c	0.14	7.31	0.0271022	0.221599	fmd1	II	4373541	4375131
SPBC649.04	0.2	7.1	0.0270175	0.221599	uvi15	II	539327	540117
SPBC947.04	0.14	6.09	0.0273621	0.221599	pfl3	II	669581	673842
SPBP23A10.07	-0.14	8.99	0.0271995	0.221599	rpa2	II	2008119	2011955
SPCC14G10.02	-0.24	7.42	0.0272294	0.221599	urb1	III	742948	747870
SPNCRNA.1068	0.36	1.15	0.0272913	0.221599	SPNCRNA.1068	I	5309027	5311689
SPAC9.12c	-0.15	4.8	0.0275875	0.223016	atp12	I	1486827	1488388
SPAC4A8.03c	0.12	6	0.0276475	0.223218	ptc4	I	2540745	2543232
SPCP1E11.09c	-0.13	9.04	0.0276827	0.223218	rpp103	III	2407722	2408378
SPAC688.12c	-0.18	6.5	0.0279205	0.224565	SPAC688.12c	I	3138674	3139779
SPNCRNA.1682	0.54	0.06	0.027897	0.224565	top3-antisense-1	II	4234033	4236335
SPAC56F8.12	0.57	-0.94	0.0279719	0.224695	SPAC56F8.12	I	1146833	1148085
SPAC6G9.10c	-0.17	7.97	0.028161	0.225137	sen1	I	3262405	3268066
SPBC106.10	0.17	6.38	0.0280722	0.225137	pka1	II	396752	398957
SPBC11B10.07c	0.14	6.8	0.0281416	0.225137	ivn1	II	1495924	1497640
SPCC1840.11	-0.15	6.42	0.0281687	0.225137	csl4	III	2279333	2280286
SPNCRNA.804	0.39	1.32	0.0282569	0.225559	atg12-antisense-1	I	2199428	2200071
SPCC1827.01c	-0.19	6.79	0.028336	0.225597	utp25	III	2374000	2376316
SPCC663.06c	0.2	3.68	0.0283683	0.225597	osr1	III	1644754	1645876
SPNCRNA.1144	-0.87	-1.64	0.0283082	0.225597	asp1-antisense-1	III	573503	574812
SPNCRNA.793	0.19	3.79	0.02849	0.226282	obr1-antisense-1	I	2093398	2095721
SPBC17D11.05	-0.15	10.2	0.0288993	0.229246	tif32	II	3314293	3317452
SPAC23H3.06	-0.11	6.55	0.0290965	0.22936	apl6	I	2502790	2506036
SPAC26H5.02c	0.12	5.22	0.0290263	0.22936	SPAC26H5.02c	I	4117195	4119311
SPAC3H5.10	-0.12	9.44	0.0290551	0.22936	rpl3202	I	3415408	3416099
SPBC359.01	-0.34	4.61	0.0291302	0.22936	SPBC359.01	II	104609	107221
SPCC16C4.08c	-0.16	6.11	0.0291047	0.22936	skb15	III	675369	677211
SPNCRNA.1586	0.33	1.5	0.0290793	0.22936	sec2302-antisense-1	II	3178326	3181780
SPBC839.02	0.11	6.69	0.0291968	0.229395	SPBC839.02	II	597310	599125
SPCC74.09	-1.11	2.54	0.0292069	0.229395	mug24	III	1917714	1922733
SPBC119.08	0.14	6.1	0.0294153	0.230477	pmk1	II	730796	732952
SPNCRNA.684	0.54	0.56	0.0294172	0.230477	SPNCRNA.684	I	790209	790793
SPBC21C3.14c	-0.11	8.39	0.0294575	0.230509	SPBC21C3.14c	II	3819038	3822074
SPNCRNA.642	-0.31	1.62	0.0295096	0.230632	mug177-antisense-1	I	361498	362202
SPAC922.06	-0.21	4.22	0.0298044	0.23064	SPAC922.06	I	5485096	5486287
SPAPB17E12.12c	0.24	3.7	0.0298373	0.23064	SPAPB17E12.12c	I	1284397	1285586
SPBC26H8.05c	0.15	5.33	0.0295499	0.23064	pph3	II	3954552	3956123
SPBC405.06	-0.12	6.82	0.0296318	0.23064	xdj1	II	3150474	3152864
SPBP35G2.16c	0.17	9.47	0.0298268	0.23064	ecl2	II	961007	963780
SPNCRNA.1327	0.29	1.96	0.0297851	0.23064	SPNCRNA.1327	II	205583	206910
SPNCRNA.610	-0.21	2.84	0.0296669	0.23064	SPAC11D3.15-antisense-1	I	136274	137355
SPNCRNA.654	0.66	-1.76	0.029586	0.23064	SPAC24H6.02c-antisense-1	I	489023	489562
SPNCRNA.673	0.52	0.02	0.0297636	0.23064	rad15-antisense-1	I	664677	665246
SPAC823.08c	-0.2	6.79	0.0299698	0.231102	rrp3	I	2592453	2594218
SPCC965.12	0.15	5.59	0.0299429	0.231102	SPCC965.12	III	2305902	2307857
SPAC29A4.17c	0.4	3.25	0.0300342	0.231186	SPAC29A4.17c	I	5113027	5114151
SPBC725.16	-0.16	5.77	0.0300535	0.231186	res1	II	1232588	1235587
SPCC584.04	-0.14	9.1	0.030176	0.231848	sup35	III	1535396	1538011
SPCC4G3.17	-0.19	6.91	0.0302804	0.232369	hdd1	III	438715	439928
SPAC13G6.09	-0.14	5.8	0.0303729	0.232798	SPAC13G6.09	I	190192	191947
SPAC20G4.05c	0.19	5.62	0.0305042	0.232961	SPAC20G4.05c	I	4822869	4824867
SPBC1683.11c	0.13	5.96	0.0304535	0.232961	SPBC1683.11c	II	166550	168643
SPNCRNA.545	0.61	-0.45	0.0304682	0.232961	SPNCRNA.545	II	3933388	3933894
SPAC890.05	-0.2	6.77	0.0305928	0.233357	SPAC890.05	I	5009365	5010806
SPBC216.03	0.27	5.57	0.030666	0.233635	SPBC216.03	II	901669	902987
SPBC428.11	0.23	9.08	0.0307476	0.233697	met17	II	465475	467247
SPCC1795.07	-0.14	5.99	0.0307143	0.233697	SPCC1795.07	III	981146	985207
SPAC6G9.11	0.12	8.05	0.0308465	0.234168	syb1	I	3267461	3269670
SPAC227.06	0.12	6.46	0.0311103	0.234649	yip5	I	506520	507605
SPBC19G7.09	0.2	5.84	0.0309605	0.234649	ulp1	II	2367079	2369193
SPBC24C6.02	-0.14	6.64	0.0310566	0.234649	SPBC24C6.02	II	2320336	2322561
SPCC338.08	0.23	5.58	0.0310151	0.234649	ctp1	III	1358737	1360260
SPCC548.07c	-0.79	3.46	0.0310721	0.234649	ght1	III	232288	235289
SPCC569.09	-0.5	4.23	0.0311315	0.234649	SPCC569.09	III	2413905	2414790
SPAC11D3.08c	0.18	6.41	0.0313768	0.234827	SPAC11D3.08c	I	120321	123785
SPAC19A8.16	0.33	2.67	0.03133	0.234827	prl65	I	2472433	2472961
SPAC4D7.09	-0.13	7.47	0.0313531	0.234827	tif223	I	5367360	5369378
SPBC25H2.03	0.12	5.85	0.0313297	0.234827	SPBC25H2.03	II	3276584	3279552
SPNCRNA.645	-0.34	2.73	0.0312172	0.234827	SPAC13C5.04-antisense-1	I	430088	431033
SPNCRNA.932	1.09	-2.79	0.0312681	0.234827	SPAC15E1.10-antisense-1	I	3732641	3733195
SPBC409.19c	0.1	6.12	0.0314282	0.234935	SPBC409.19c	II	1171307	1174224
SPAC2C4.11c	-0.16	6.23	0.0315044	0.234952	rbp28	I	4278378	4279620
SPCP20C8.03	-0.37	1.12	0.0314929	0.234952	SPCP20C8.03	III	32624	33393
SPAC56F8.05c	-0.14	7.67	0.0315824	0.235101	mug64	I	1134418	1136038
SPNCRNA.1100	0.23	2.14	0.0315984	0.235101	hsp3101-antisense-1	III	47513	48882
SPBP4H10.09	-2.05	-2.09	0.0316685	0.235347	rsv1	II	2888450	2889979
SPAC5H10.04	0.2	3.21	0.0317593	0.235357	SPAC5H10.04	I	152851	155515
SPBC646.06c	0.14	5.28	0.031781	0.235357	agn2	II	932654	934311
SPNCRNA.721	-0.34	1.67	0.0317713	0.235357	SPNCRNA.721	I	1191107	1192276
SPAC19B12.05c	-0.1	7.4	0.0318507	0.235599	fcp1	I	4890740	4893805
SPBC1709.12	0.18	6.44	0.0319264	0.235884	rid1	II	1122785	1126031
SPAC1834.05	-0.11	7.07	0.032029	0.236143	alg9	I	4702256	4704743
SPAC30D11.05	-0.13	5.83	0.0320729	0.236143	aps3	I	1109349	1111221
SPBC1A4.07c	-0.13	7.47	0.0320548	0.236143	sof1	II	1988498	1990473
SPAC2E1P5.03	0.1	7.08	0.0321435	0.236367	erj5	I	3326830	3329028
SPBC2D10.10c	-0.36	8.62	0.0321798	0.236367	fib1	II	2982427	2983735
SPCC16A11.04	-0.11	6.44	0.0322149	0.236367	snx12	III	874032	877803
SPCC790.02	0.11	6.49	0.0322652	0.236463	pep3	III	2242247	2245648
SPAC6F6.10c	0.11	7.7	0.0324745	0.237722	arc2	I	2749724	2751060
SPAC10F6.03c	-0.28	8.62	0.0325598	0.237799	cts1	I	1211195	1213553
SPCP1E11.10	-0.09	6.42	0.0325455	0.237799	SPCP1E11.10	III	2408742	2409461
SPBC1711.07	-0.17	7.26	0.0326671	0.238308	rrb1	II	2145592	2147913
SPNCRNA.1153	0.27	3.32	0.0328292	0.239217	SPCC18B5.02c-antisense-1	III	717659	718923
SPAC24H6.11c	-0.18	6.71	0.0330522	0.240565	SPAC24H6.11c	I	464120	468581
SPCC1450.09c	0.2	4.15	0.0331488	0.240992	SPCC1450.09c	III	1741202	1745250
SPAC1142.04	-0.15	8.24	0.0332348	0.241342	SPAC1142.04	I	3631499	3633874
SPNCRNA.1271	0.64	-0.8	0.033275	0.241357	ckk2-antisense-1	III	2204097	2205588
SPBC15D4.05	-0.15	5.7	0.0334209	0.24214	SPBC15D4.05	II	3020681	3022237
SPAC22A12.06c	-0.14	8.37	0.0335668	0.24251	SPAC22A12.06c	I	1163745	1165581
SPCC1682.16	0.13	8.06	0.0335865	0.24251	rpt4	III	405538	407595
SPNCRNA.511	0.23	2.47	0.0335836	0.24251	SPNCRNA.511	III	2011026	2012559
SPNCRNA.1570	-0.37	1.26	0.033629	0.242541	abc1-antisense-1	II	3001074	3003417
SPCC965.10	-0.18	6.01	0.0337595	0.243206	SPCC965.10	III	2302442	2305222
SPAC12G12.05c	0.14	6.15	0.0342159	0.243458	taf9	I	338286	339763
SPAC16C9.04c	-0.16	6.35	0.0339157	0.243458	mot2	I	796876	798833
SPAC17A5.11	0.2	3.04	0.033864	0.243458	rec12	I	1772925	1774203
SPAC1B3.13	-0.16	7.64	0.0340239	0.243458	nan1	I	4951337	4954199
SPAC688.13	0.2	3.39	0.0340685	0.243458	scn3	I	3139395	3141117
SPAC9.06c	-0.33	3.94	0.0340524	0.243458	SPAC9.06c	I	1473457	1474671
SPBC16A3.18	0.17	6.56	0.0341316	0.243458	cip1	II	4261818	4264189
SPBC776.07	0.14	6.84	0.033934	0.243458	SPBC776.07	II	3186348	3187470
SPBPB2B2.08	0.39	3.24	0.034203	0.243458	SPBPB2B2.08	II	4475953	4476674
SPCC1884.02	0.11	7.03	0.0341835	0.243458	nic1	III	43480	46985
SPSNORNA.21	0.22	4.77	0.0340364	0.243458	snoU14	II	1308634	1308745
SPBC1773.10c	-0.11	9.28	0.0344311	0.244715	nrs1	II	301754	303734
SPAC22F8.06	0.11	7.16	0.0346869	0.245365	pam1	I	4795276	4796348
SPAC6B12.07c	0.13	7.2	0.0346394	0.245365	SPAC6B12.07c	I	2421446	2423898
SPCC70.04c	0.17	3.65	0.0345836	0.245365	SPCC70.04c	III	2352568	2354572
SPNCRNA.1075	0.48	-0.41	0.0346973	0.245365	new12-antisense-1	I	5353770	5354310
SPNCRNA.1621	-0.22	2.18	0.0347156	0.245365	mok13-antisense-1	II	3597308	3597967
SPAC3G9.02	-0.23	4.26	0.0348501	0.245598	oar2	I	3180426	3181164
SPBC1778.08c	0.14	7.04	0.0348053	0.245598	arc3	II	3111115	3112285
SPNCRNA.1626	-0.14	6.16	0.0348646	0.245598	SPNCRNA.1626	II	3626024	3631136
SPAC18G6.11c	-0.16	7.13	0.0349795	0.246135	rrn3	I	2236712	2239308
SPCC613.12c	-0.14	5.67	0.0350483	0.246346	raf1	III	99716	102315
SPCC126.04c	0.12	5.61	0.0350912	0.246375	sgf73	III	2122510	2123996
SPAC222.03c	-0.17	6.01	0.0351889	0.246516	tim10	I	947876	948800
SPBC36.04	0.25	7.4	0.0351725	0.246516	cys11	II	847930	849485
SPBC3D6.04c	0.12	5.57	0.0352564	0.246717	mad1	II	1274839	1277059
SPAC17G6.13	0.2	6.29	0.035397	0.247428	slt1	I	3615585	3617100
SPBC3E7.12c	0.21	7.49	0.0354394	0.247452	cfh4	II	2682000	2683902
SPAC3H1.06c	0.16	7.01	0.0356477	0.248634	SPAC3H1.06c	I	1940432	1944540
SPCC584.02	0.64	-1.57	0.035725	0.2489	cuf2	III	1532126	1532753
SPAC227.17c	-0.14	7.76	0.0358574	0.249139	SPAC227.17c	I	529167	530275
SPNCRNA.774	0.66	-0.96	0.0358023	0.249139	SPNCRNA.774	I	1920876	1921644
SPNCRNA.954	-0.16	4.51	0.0358769	0.249139	SPAPB15E9.02c-antisense-1	I	3991342	3993560
SPAC1952.15c	0.28	2.06	0.035988	0.249493	rec24	I	4994792	4997222
SPAC824.07	0.14	6.13	0.0360458	0.249493	glo2	I	1696422	1697726
SPAC8C9.12c	-0.33	6.22	0.036024	0.249493	SPAC8C9.12c	I	3661062	3663364
SPCC1494.07	-0.14	7.95	0.0360993	0.249592	SPCC1494.07	III	2336552	2341383
SPAC31G5.18c	0.13	5.51	0.036268	0.249672	sde2	I	3020648	3021791
SPBC1711.12	0.11	7.41	0.0361601	0.249672	SPBC1711.12	II	2157543	2159733
SPCC970.03	-0.16	7.55	0.036236	0.249672	cbr1	III	509925	511627
SPNCRNA.671	0.29	4.37	0.0362567	0.249672	SPNCRNA.671	I	660084	664108
SPAC20H4.11c	0.27	3.93	0.0363598	0.250032	rho5	I	2131685	2133066
SPAC140.03	0.13	5.2	0.0365446	0.25022	arb1	I	1899904	1901605
SPAC1B3.11c	0.25	3.62	0.0364932	0.25022	ypt4	I	4948541	4950238
SPBC409.08	-0.74	5.29	0.036518	0.25022	SPBC409.08	II	1151272	1154300
SPCC11E10.04	-0.11	5.65	0.0364376	0.25022	ppr6	III	1457791	1459534
SPAC959.02	0.11	7.46	0.036895	0.251805	sec17	I	3388183	3389788
SPCC1322.14c	0.12	9.56	0.0368798	0.251805	vtc4	III	1318375	1321275
SPNCRNA.1202	0.18	3.64	0.0368671	0.251805	SPCC584.01c-antisense-1	III	1525414	1528475
SPAC22A12.17c	0.31	2.11	0.0369983	0.252239	SPAC22A12.17c	I	1185837	1189506
SPAC13G7.08c	-0.23	5.94	0.0372939	0.252968	crb3	I	2310271	2311973
SPBC1198.07c	0.23	5.83	0.037276	0.252968	SPBC1198.07c	II	184591	186786
SPCC16C4.14c	-0.11	7.02	0.0371681	0.252968	sfc4	III	691825	694903
SPCC550.05	-0.11	5.55	0.0371909	0.252968	nse1	III	1193982	1196023
SPCC965.06	0.16	5.52	0.0373042	0.252968	osr2	III	2292613	2294574
SPAC323.06c	0.19	4.66	0.037518	0.253895	uba5	I	3915560	3917711
SPAC4F8.02c	-0.19	5.79	0.0375209	0.253895	mrpl40	I	2673637	2674938
SPBC211.02c	-0.09	6.12	0.0376946	0.254799	cwf3	II	3870710	3873758
SPCC825.01	-0.16	8.92	0.0378052	0.255276	SPCC825.01	III	1022479	1025391
SPBP8B7.19	-0.13	8.26	0.0378468	0.255285	spt16	II	3671316	3674622
SPBP35G2.02	0.14	5.56	0.0381847	0.257291	txc1	II	963900	968891
SPAC343.03	0.17	4.17	0.0383899	0.258399	apc11	I	1643043	1644421
SPNCRNA.111	0.12	9.41	0.0384454	0.258499	SPNCRNA.111	II	3978331	3982106
SPAC57A10.06	-0.28	3.28	0.0385563	0.258698	mug15	I	1376587	1377072
SPBC1198.01	-0.17	3.95	0.0385468	0.258698	fmd2	II	172378	174315
SPAC5H10.13c	-0.15	7.2	0.0387896	0.259715	gmh2	I	167766	170137
SPAC6F12.03c	0.15	5.98	0.038761	0.259715	fsv1	I	1313236	1314511
SPAC23C11.16	0.17	6.66	0.0390423	0.260687	plo1	I	2164162	2166765
SPBC21.07c	0.18	3.28	0.0390256	0.260687	ppk24	II	3226567	3228745
SPBC2D10.03c	0.18	5.4	0.03914	0.260687	SPBC2D10.03c	II	2968263	2968967
SPNCRNA.1617	-0.4	2.24	0.0390991	0.260687	SPBC887.16-antisense-1	II	3574355	3575038
SPNCRNA.983	0.72	-1.82	0.0391302	0.260687	tsn1-antisense-1	I	4395187	4395595
SPNCRNA.1356	0.33	1.53	0.0392188	0.260938	mcp6-antisense-1	II	428944	430390
SPAC167.04	0.11	6.13	0.0393914	0.261539	pam17	I	1553587	1554941
SPACUNK4.10	0.15	9.14	0.0393597	0.261539	SPACUNK4.10	I	2891049	2892803
SPAC1F3.10c	0.11	5.73	0.0394536	0.261553	oct1	I	634898	639430
SPBC660.17c	0.1	5.6	0.0394782	0.261553	SPBC660.17c	II	233267	234309
SPCC736.12c	-0.11	7.24	0.039517	0.261553	mmi1	III	337088	340150
SPBC21B10.12	0.21	3.63	0.0396024	0.261678	rec6	II	1648948	1649671
SPCC1906.04	-0.26	2.9	0.0396183	0.261678	wtf20	III	2019973	2021941
SPBP35G2.07	-0.21	9.25	0.0396595	0.261678	ilv1	II	976926	979390
SPAC1B2.03c	-0.22	8.66	0.0397091	0.261734	SPAC1B2.03c	I	2810265	2812517
SPAC3F10.08c	-0.15	5.79	0.0397892	0.26199	faf1	I	2831474	2832797
SPAC24B11.09	-0.24	7.43	0.0398414	0.262062	mpc2	I	214093	216962
SPAC27D7.12c	-0.22	3.48	0.0399843	0.262152	but1	I	4533326	4534385
SPBC30D10.15	-0.15	6.59	0.0400201	0.262152	SPBC30D10.15	II	3065905	3067562
SPCC1450.01c	0.23	3.3	0.0399462	0.262152	SPCC1450.01c	III	1726173	1727116
SPCC1919.03c	0.11	7.04	0.039969	0.262152	amk2	III	2207485	2209022
SPAC16C9.01c	0.18	5.93	0.0401025	0.262341	SPAC16C9.01c	I	790245	792274
SPNCRNA.1584	0.33	1.08	0.0401315	0.262341	ptn1-antisense-1	II	3161772	3163104
SPBC409.13	-0.15	6.17	0.0402098	0.262583	rib4	II	1165419	1166729
SPAC22E12.03c	0.3	5.26	0.0406537	0.26347	sdj1	I	5022786	5023906
SPAC23C4.08	-0.1	6.71	0.0404813	0.26347	rho3	I	1041414	1043083
SPAC23H4.06	-0.33	8.59	0.0403899	0.26347	gln1	I	1596073	1598149
SPAC8E11.08c	-0.32	2.1	0.0406863	0.26347	SPAC8E11.08c	I	3375516	3376823
SPAC926.08c	-0.19	7.39	0.0406051	0.26347	rpf2	I	3898266	3899709
SPBC1289.11	0.17	6.38	0.0407188	0.26347	spf38	II	4404292	4405886
SPBC14C8.13	-0.19	5.44	0.0405434	0.26347	ber1	II	2225083	2228837
SPBC23G7.10c	0.27	4.42	0.0406371	0.26347	SPBC23G7.10c	II	2118146	2119536
SPCC584.11c	-0.29	7.22	0.0404306	0.26347	SPCC584.11c	III	1511044	1513341
SPAC110.03	0.1	7.94	0.0407859	0.263635	cdc42	I	1916054	1917656
SPBC902.05c	0.14	7.36	0.0408482	0.26377	idh2	II	491874	493812
SPAC1002.14	0.12	5.23	0.0409798	0.264107	itt1	I	1824570	1826248
SPAP8A3.06	0.16	5.49	0.0412529	0.264107	uaf2	I	5325582	5326435
SPBC14F5.06	-0.25	7.77	0.0412745	0.264107	rli1	II	4164564	4167261
SPBC16E9.07	-0.15	4.63	0.0411482	0.264107	mug100	II	1926374	1928346
SPBC30D10.07c	-0.12	6.42	0.0412687	0.264107	SPBC30D10.07c	II	3085930	3088899
SPBC30D10.18c	-0.11	7.66	0.0412151	0.264107	rpl102	II	3060505	3061591
SPBC36.03c	-0.49	7.16	0.0412408	0.264107	mfs3	II	843017	845684
SPBPB2B2.06c	0.21	7.88	0.0409948	0.264107	SPBPB2B2.06c	II	4469018	4471207
SPNCRNA.15	0.65	-0.43	0.0411231	0.264107	prl15	II	1329046	1329760
SPAC8C9.10c	-0.22	6.14	0.0414699	0.264292	rrp14	I	3657811	3659118
SPBC336.07	0.12	5.74	0.0414377	0.264292	sfc3	II	2750876	2755161
SPCC1322.08	0.18	6.49	0.0413946	0.264292	srk1	III	1301937	1305468
SPNCRNA.606	-0.31	1.72	0.0413795	0.264292	isp3-antisense-1	I	95159	96525
SPBC14C8.07c	0.15	5.76	0.0415388	0.264466	cdc18	II	2215955	2218031
SPCC962.02c	-0.16	5.88	0.0416326	0.264798	bir1	III	545805	549313
SPAC5D6.07c	0.15	4.01	0.0417928	0.265551	pxa1	I	1500851	1502700
SPBC1773.05c	0.18	4.41	0.0419781	0.266463	tms1	II	290730	292250
SPAC821.10c	0.22	9.79	0.0422755	0.268082	sod1	I	1002838	1003600
SPCC645.14c	0.1	9.47	0.0423207	0.268102	sti1	III	1261338	1263716
SPAC1093.05	-0.16	7.46	0.0424537	0.268676	SPAC1093.05	I	4619603	4622351
SPBC25H2.14	-0.17	4.44	0.0425856	0.268975	mug16	II	3250199	3251263
SPNCRNA.1634	-0.16	3.62	0.0425601	0.268975	SPBC13G1.05-antisense-1	II	3735189	3736662
SPAC4F10.09c	-0.13	8.4	0.0426724	0.268988	noc1	I	4846619	4849543
SPCC330.01c	0.12	6.29	0.0426625	0.268988	rhp16	III	102424	106750
SPBC1604.11	0.11	7.13	0.0427855	0.26942	atp17	II	3911713	3912614
SPCC417.06c	0.66	-1.61	0.0428256	0.26942	mug27	III	1677093	1679436
SPAC17A5.15c	-0.18	9.42	0.0430672	0.269436	gus1	I	1782880	1785113
SPAC6G9.02c	-0.18	7.8	0.0430136	0.269436	nop9	I	3243108	3245369
SPAC7D4.07c	0.23	9.2	0.0430826	0.269436	trx1	I	2625316	2625855
SPBC11B10.01	0.15	6.13	0.0428981	0.269436	alg2	II	1486094	1489535
SPBC2F12.03c	-0.23	7.67	0.0429735	0.269436	ebs1	II	1734240	1738362
SPCC1795.12c	-0.18	5.42	0.0429576	0.269436	SPCC1795.12c	III	972787	973891
SPAC31G5.09c	0.14	7.3	0.0432056	0.269862	spk1	I	2999546	3001687
SPBPB10D8.01	-0.22	5.26	0.0432357	0.269862	SPBPB10D8.01	II	80899	83357
SPBC405.01	-0.13	9.45	0.043313	0.270079	ade1	II	3140566	3143304
SPAC890.04c	-0.13	7.01	0.0434406	0.270609	SPAC890.04c	I	5007016	5009628
SPBC1105.11c	0.16	9.11	0.0435896	0.271006	hht3	II	3528800	3529657
SPBC1709.01	0.26	6.13	0.0435703	0.271006	chs2	II	1095163	1098228
SPAC1A6.04c	-0.34	9.62	0.044074	0.273483	plb1	I	1074331	1077514
SPCC16A11.09c	-0.09	7.01	0.0440617	0.273483	tim23	III	885686	886972
SPAC607.02c	-0.2	5.26	0.0442101	0.274059	SPAC607.02c	I	2039370	2040627
SPBC1A4.05	-0.2	6.46	0.0446795	0.276699	blt1	II	1984412	1988552
SPAC1486.08	-0.18	5.47	0.0450053	0.277853	cox16	I	3207482	3209724
SPAC23H4.16c	0.11	5.12	0.0450782	0.277853	SPAC23H4.16c	I	1578314	1579610
SPAC9E9.14	0.11	5.81	0.0449573	0.277853	vps24	I	4469175	4470627
SPBC16E9.03c	0.18	4.7	0.0450844	0.277853	coa1	II	1920391	1921835
SPBC19G7.07c	-0.13	6.72	0.0450744	0.277853	ppr3	II	2359374	2363595
SPAC23H3.09c	-0.21	8.59	0.0452475	0.278535	gly1	I	2507707	2509630
SPAC3A11.08	0.11	6.4	0.0452828	0.278535	pcu4	I	3452867	3455747
SPBC83.17	-0.1	6.93	0.0456165	0.2801	SPBC83.17	II	1542503	1543222
SPNCRNA.1336	0.25	2.41	0.0456254	0.2801	SPNCRNA.1336	II	294730	296112
SPNCRNA.1424	-0.55	-0.37	0.0457021	0.2803	SPNCRNA.1424	II	1264952	1266264
SPAC3G9.09c	-0.15	8.73	0.0461216	0.282523	tif211	I	3166394	3167699
SPBC3B8.01c	-0.13	6.37	0.0462213	0.282523	arh1	II	3397303	3399191
SPBC839.16	0.27	11.12	0.0462424	0.282523	thf1	II	627934	631710
SPCC306.07c	-0.15	5.57	0.0462252	0.282523	SPCC306.07c	III	419629	421247
SPNCRNA.1180	0.25	2.52	0.04635	0.282908	rec11-antisense-1	III	1224631	1225817
SPBC800.06	-0.15	7.22	0.046406	0.282979	brx1	II	262562	263669
SPAC23H3.04	0.19	4.35	0.0464955	0.283148	SPAC23H3.04	I	2499035	2500236
SPAC30C2.02	-0.22	6.77	0.046529	0.283148	mmd1	I	4635485	4636898
SPAC3G9.03	-0.13	9.2	0.0465675	0.283148	rpl2301	I	3179343	3180033
SPAC144.09c	-0.16	5.5	0.0468685	0.283825	sfc2	I	4669627	4671454
SPAC1565.03	0.34	2.17	0.0468494	0.283825	SPAC1565.03	I	1294306	1295341
SPAC1687.11	-0.15	8.32	0.0469259	0.283825	spb1	I	922271	925133
SPAC186.09	-1.07	-0.36	0.0467246	0.283825	SPAC186.09	I	5552811	5554529
SPBC1709.05	-0.17	12.17	0.0469468	0.283825	sks2	II	1106347	1108511
SPNCRNA.976	-0.4	2.85	0.0468685	0.283825	SPNCRNA.976	I	4294279	4294816
SPCC338.17c	0.19	6.31	0.0471021	0.284223	rad21	III	1342923	1346239
SPNCRNA.944	-0.39	-0.28	0.0470968	0.284223	SPNCRNA.944	I	3876714	3877850
SPAC3C7.03c	-0.1	5.39	0.0472427	0.284629	rad55	I	2066442	2067904
SPBC8D2.18c	0.15	12.12	0.047259	0.284629	SPBC8D2.18c	II	1391439	1393012
SPCC13B11.03c	0.29	0.96	0.0473453	0.284648	SPCC13B11.03c	III	1594872	1596605
SPNCRNA.1192	-0.27	2.64	0.0473517	0.284648	wtf11-antisense-1	III	1400016	1400808
SPAC1486.06	-0.1	7.22	0.0475358	0.284713	npt1	I	3203863	3205821
SPAC20G8.07c	0.16	7.4	0.0475003	0.284713	erg2	I	1410106	1411256
SPAC4H3.08	0.57	2.57	0.0475612	0.284713	SPAC4H3.08	I	3841498	3843136
SPAC8E11.07c	-0.21	5.27	0.0475385	0.284713	alp31	I	3377096	3378081
SPBC215.06c	-0.16	5.45	0.0475866	0.284713	SPBC215.06c	II	4037989	4038940
SPAC2F7.02c	-0.11	6.68	0.0476497	0.284823	psr1	I	531794	533731
SPAC13G7.05	0.15	5.28	0.0477092	0.28491	are1	I	2305136	2307359
SPAC3G6.10c	-0.15	3.77	0.047841	0.285033	vps51	I	5397347	5398200
SPBC24C6.13	0.19	4.35	0.0478643	0.285033	new16	II	2340670	2341088
SPNCRNA.611	0.36	2.26	0.0477782	0.285033	SPAC11D3.18c-antisense-1	I	144733	146501
SPBC713.04c	-0.1	7.61	0.0479128	0.285055	pwp2	II	873265	876158
SPBC17G9.09	-0.38	7.23	0.0479733	0.285147	tif213	II	2187455	2189134
SPAC17H9.20	-0.15	5.66	0.0480897	0.285157	psc3	I	2036327	2040544
SPAC20G8.05c	0.14	7.82	0.0481167	0.285157	cdc15	I	1399200	1402965
SPAC57A10.04	0.21	2.65	0.0481545	0.285157	mug10	I	1370156	1371501
SPCC24B10.14c	0.23	2.57	0.0481475	0.285157	xlf1	III	924212	925737
SPAC11E3.15	-0.13	10.41	0.0482034	0.285181	rpl22	I	5314778	5315429
SPAPB1A10.13	-0.36	5.38	0.0482944	0.285453	SPAPB1A10.13	I	1887459	1890591
SPAC22A12.04c	-0.13	10.1	0.048527	0.286562	rps2201	I	1162203	1162901
SPAC25G10.01	0.12	7.27	0.04861	0.286786	SPAC25G10.01	I	4295138	4297332
SPBC17D11.08	0.22	6.17	0.048749	0.287158	SPBC17D11.08	II	3323993	3326011
SPNCRNA.869	-0.93	-0.79	0.0487635	0.287158	SPNCRNA.869	I	2979599	2980606
SPCC645.08c	-0.11	8.02	0.0489163	0.287662	snd1	III	1249494	1252275
SPNCRNA.1434	0.43	0.4	0.0489396	0.287662	SPNCRNA.1434	II	1449900	1450935
SPAC20H4.08	-0.18	5.5	0.0490753	0.288073	whi2	I	2124684	2125978
SPAC664.08c	-0.16	6.7	0.0491003	0.288073	bfr2	I	1716010	1717792
SPAC1A6.05c	-0.13	6.33	0.0492188	0.288236	ptl3	I	1079635	1081713
SPBC15C4.05	-0.12	7.85	0.0492142	0.288236	dhx29	II	2246288	2251304
SPAC6B12.04c	0.13	6.25	0.0494145	0.288319	SPAC6B12.04c	I	2415952	2418241
SPBP4H10.20	-0.11	5.61	0.0494106	0.288319	nhm1	II	2911931	2913532
SPNCRNA.1273	0.53	-0.58	0.0492818	0.288319	SPCC1919.05-antisense-1	III	2212663	2214470
SPNCRNA.1400	0.38	1.2	0.0493641	0.288319	SPNCRNA.1400	II	963076	963774
SPAC1527.01	0.11	7.63	0.0495551	0.288345	mok11	I	4375301	4382775
SPAC7D4.11c	0.1	5.77	0.049533	0.288345	sec39	I	2617856	2620433
SPCC126.08c	0.11	7.17	0.0495032	0.288345	SPCC126.08c	III	2129838	2131089
SPAC1002.13c	-0.18	10.19	0.0496235	0.288479	psu1	I	1821401	1823413
SPBC13G1.15c	0.29	1	0.0497675	0.288788	SPBC13G1.15c	II	3741388	3742251
SPBC800.02	0.21	3.62	0.0497466	0.288788	whi5	II	253148	253984
SPBC776.02c	-0.2	7.51	0.0499065	0.28933	dis2	II	3173165	3175376

[truncated: 2 more sheets: triple copy G34K vs wt p=0.05, Sheet11]
